# Supplementary material for: The ABoVE L-band and P-band airborne synthetic aperture radar surveys
Source: Copernicus journal article supplement (doi:10.5194/essd-16-2605-2024), 2024-06-04
Supplement: Supplementary file 1 [file essd-16-2605-2024-supplement.pdf]

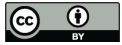

*Supplement of*

## **The ABoVE L-band and P-band airborne synthetic aperture radar surveys**

**Charles E. Miller et al.**

*Correspondence to:* Charles E. Miller ([charles.e.miller@jpl.nasa.gov](mailto:charles.e.miller@jpl.nasa.gov))

The copyright of individual parts of the supplement might differ from the article licence.

41 **Summary**

42 NASA's Arctic Boreal Vulnerability Experiment (ABoVE) conducted airborne synthetic aperture radar  
43 (SAR) surveys of over 120,000 km<sup>2</sup> in Alaska and northwestern Canada during 2017, 2018, 2019, and  
44 2022 (**Figure S1**). Here, we present an annotated guide to the L-band and P-band airborne SAR data  
45 acquired during the ABoVE airborne campaigns [Miller et al. 2019]. We provide a detailed description  
46 of the ~80 SAR flight lines and how each fits into the ABoVE experimental design. Extensive maps,  
47 tables, and hyperlinks give direct access to every flight plan as well as individual flight lines. This entry  
48 is a guide to enable interested readers to fully explore the ABoVE L- and P-band SAR data.  
49  
50

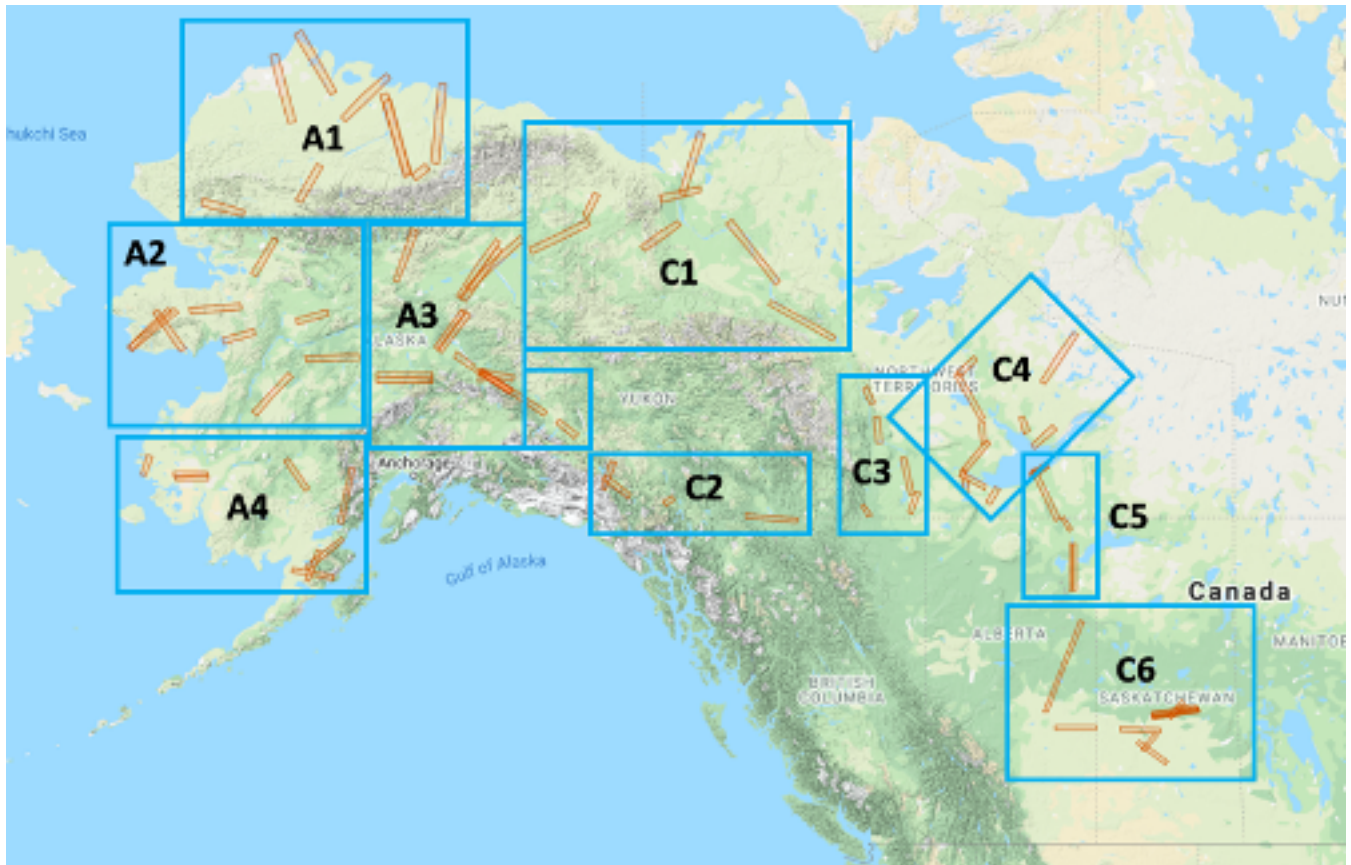

51 **Figure S1. Flight lines for L-band and P-band PolInSAR measurements capture critical bioclimatic, permafrost, and**  
52 **geographic gradients as well as key field sites and long-term measurement records across the 4 Mkm<sup>2</sup> ABoVE**  
53 **domain. The flight lines are collected into 10 composites which roughly correspond to the Alaskan (A1-A4) and**  
54 **Canadian (C1-C6) regions sampled on individual flight days. © Google Maps**  
55

56  
57  
58  
59

## 60 **Data Availability**

61 Miller, Charles E., Peter C. Griffith, Elizabeth Hoy, Naiara S. Pinto, Yunling Lou, Scott Hensley, Bruce  
62 D. Chapman, Jennifer Baltzer, Kazem Bakian-Dogaheh, W. Robert Bolton, Laura Bourgeau-Chavez,  
63 Richard H. Chen, Byung-Hun Choe, Leah Clayton, Thomas A. Douglas, Nancy French, Jean E.  
64 Holloway, Gang Hong, Lingcao Huang, Go Iwahana, Liza Jenkins, John S. Kimball, Tatiana Loboda,  
65 Michelle Mack, Philip Marsh, Roger J. Michaelides, Mahta Moghaddam, Andrew Parsekian, Kevin  
66 Schaefer, Paul R. Siqueira, Debjani Singh, Alireza Tabatabaenejad, Merritt Turetsky, Ridha Touzi,  
67 Elizabeth Wig, Cathy J. Wilson, Paul Wilson, Stan D. Wullschleger, Yonghong Yi, Howard A. Zebker<sup>22</sup>,  
68 Yu Zhang, Yuhuan Zhao, Scott J. Goetz. 2022. Summary of the ABoVE L-band and P-band Airborne  
69 SAR Surveys. ORNL DAAC, Oak Ridge, Tennessee, USA. <https://doi.org/10.3334/ORNLDAAC/2150>

70

## 71 **Table of Contents**

- 72 1. [Dataset Overview](#)
- 73 2. Alaska Flight Lines
- 74 3. Canada Flight Lines
- 75 4. P-band Flight Lines
- 76 5. Legacy Flight Lines
- 77 6. [Data Access](#)
- 78 7. [References](#)
- 79 8. [Dataset Revisions](#)

80

## 81 **1. Dataset Overview**

82 The L-band and P-band SARs are foundational measurements in the ABoVE airborne campaign  
83 strategy [Miller et al. 2019]. The ~80 flight lines described here form the framework for the remainder  
84 of ABoVE airborne remote sensing acquisitions. The baseline L-band campaigns were flown in June  
85 (DOY 164-173, **Table S1**) and September (DOY 251-263, **Table S2**) of 2017 to characterize the land  
86 surface during periods of minimum and maximum active layer thickness, respectively. Subsequent L-  
87 band campaigns in 2018 (DOY 231-241, **Table S3**), 2019 (DOY 247-260, **Table S4**), and 2022 (DOY  
88 226-237, **Table S5**) provide a time series synched to maximum annual active layer thickness. P-band  
89 campaigns were conducted in May-June (DOY 142-157, **Table S6**) and August (DOY 219-227, **Table**  
90 **S7**) of 2017. There was a 2-day P-band mini-campaign in October 2017 to extend the legacy time series  
91 of early cold season acquisitions over the Seward Peninsula, NW Alaska and North Slope Alaska (DOY  
92 280-283, **Table S8**).

93

94 ABoVE SAR flight lines (**Figure S1**) leverage legacy L- and P-band SAR transects acquired during the  
95 pre-ABoVE period; remotely-sensed permafrost active layer thickness time series derived from satellite  
96 interferometric SAR observations ([ReSALT](#)) [Schaefer et al. 2015]; SAR data from PALSAR,  
97 PALSAR-2, RadarSat, RadarSat-2, and Sentinel-1; historic or planned airborne LiDAR acquisitions;  
98 and data from existing field sites [Hoy et al. 2018]. Legacy airborne SAR flight lines include the L-band  
99 grid acquired over the Boreal Ecosystem Research and Monitoring Sites ([BERMS](#)) area near Prince  
00 Albert, SK during SMAP CanEx 2010 [Magagi et al. 2012], the P-band lines over the BERMS area

01 acquired from 2012-2015 during the Airborne Microwave Observatory of Subcanopy and Subsurface  
 02 ([AirMOSS](#)) Earth Ventures Sub-orbital (EV-S1) investigation [Allen et al. 2010; Moghaddam et al.  
 03 2016], and a collection of 10 L- and P-band flight lines acquired over the Seward Peninsula,  
 04 Northwestern Interior, and North Slope of Alaska during 2014 and 2015 [Chen et al. 2019a, 2019b].  
 05 The BERMS area observations link ABoVE to the Boreal Ecosystem–Atmosphere Study ([BOREAS](#))  
 06 studies of the 1990s [Sellers et al. 1995; 1997].  
 07

## 08 **1.1 L-band and P-band Campaign Summaries**

09 The baseline L-band campaigns were flown in June (DOY 164-173, **Table S1**) and September (DOY  
 10 251-263, **Table S2**) of 2017 to characterize the land surface during periods of minimum and maximum  
 11 active layer thickness, respectively. Subsequent L-band campaigns in 2018 (DOY 231-241, **Table S3**),  
 12 2019 (DOY 247-260, **Table S4**), and 2022 (DOY 226-235, **Table S5**) provide a time series synched to  
 13 maximum annual active layer thickness. P-band campaigns were conducted in May-June (DOY 142-  
 14 157, **Table S6**) and August (DOY 219-227, **Table S7**) of 2017. There was a 2-day P-band mini-  
 15 campaign in October 2017 to extend the legacy time series of early cold season acquisitions over the  
 16 Seward Peninsula, NW Alaska and North Slope Alaska (DOY 280-283, **Table S8**).  
 17

18 **Table S1. ABoVE L-band PolInSAR Campaign #1: June 2017**

| <b>Flight Plan</b>    | <b>Sortie Date</b> | <b>Regions Sampled (hyperlink to flight line map)</b>        |
|-----------------------|--------------------|--------------------------------------------------------------|
| <a href="#">17062</a> | 2017-06-13         | <a href="#">PAD-Transboundary Watershed</a>                  |
| <a href="#">17063</a> | 2017-06-14         | <a href="#">Great Slave Lake Region</a>                      |
| <a href="#">17064</a> | 2017-06-15         | <a href="#">Yellowknife – Fairbanks Transit</a>              |
| <a href="#">17065</a> | 2017-06-16         | <a href="#">Southwest Alaska</a>                             |
| <a href="#">17066</a> | 2017-06-17         | <a href="#">Southwest Alaska &amp; YK Delta</a>              |
| <a href="#">17067</a> | 2017-06-19         | <a href="#">Seward Peninsula &amp; NW Alaska</a>             |
| <a href="#">17068</a> | 2017-06-20         | <a href="#">Mackenzie Valley &amp; Upper Yukon Territory</a> |
| <a href="#">17069</a> | 2017-06-21         | <a href="#">North Slope Alaska &amp; Yukon Flats</a>         |
| <a href="#">17070</a> | 2017-06-22         | <a href="#">Mackenzie Valley Reflight</a>                    |

19  
 20  
 21

**Table S2. ABoVE L-Band PolInSAR Campaign #2: September 2017**

| <b>Flight Plan</b>    | <b>Sortie Date</b> | <b>Regions Sampled (hyperlink to flight line map)</b>                |
|-----------------------|--------------------|----------------------------------------------------------------------|
| <a href="#">17093</a> | 2017-09-08         | <a href="#">BERMS - PAD-Transboundary Watershed</a>                  |
| <a href="#">17094</a> | 2017-09-09         | <a href="#">Great Slave Lake Region &amp; Upper Mackenzie Valley</a> |
| <a href="#">17095</a> | 2017-09-10         | <a href="#">Yellowknife – Fairbanks Transit</a>                      |
| <a href="#">17096</a> | 2017-09-12         | <a href="#">Mackenzie Valley &amp; Upper Yukon Territory</a>         |

|                       |            |                                                      |
|-----------------------|------------|------------------------------------------------------|
| <a href="#">17097</a> | 2017-09-15 | <a href="#">Seward Peninsula &amp; NW Alaska</a>     |
| <a href="#">17098</a> | 2017-09-16 | <a href="#">North Slope Alaska &amp; Yukon Flats</a> |
| <a href="#">17099</a> | 2017-09-17 | <a href="#">Southwest Alaska &amp; YK Delta</a>      |
| <a href="#">17100</a> | 2017-09-19 | <a href="#">Interior Alaska</a>                      |
| <a href="#">17101</a> | 2017-09-20 | <a href="#">Delta Junction AK TomoSAR</a>            |

22  
23  
24  
25

**Table S3. ABoVE L-Band PolInSAR Campaign #3: August 2018**

| <b>Flight Plan</b>    | <b>Sortie Date</b> | <b>Regions Sampled<br/>(hyperlink to flight line map)</b>    |
|-----------------------|--------------------|--------------------------------------------------------------|
| <a href="#">18046</a> | 2018-08-19         | <a href="#">BERMS TomoSAR</a>                                |
| <a href="#">18047</a> | 2018-08-21         | <a href="#">PAD &amp; Great Slave Lake 1</a>                 |
| <a href="#">18048</a> | 2018-08-22         | <a href="#">Great Slave Lake Region &amp; Scotty Creek</a>   |
| <a href="#">18049</a> | 2018-08-24         | <a href="#">Yellowknife – Fairbanks Transit</a>              |
| <a href="#">18050</a> | 2018-08-26         | <a href="#">North Slope Alaska</a>                           |
| <a href="#">18051</a> | 2018-08-27         | <a href="#">Interior Alaska</a>                              |
| <a href="#">18052</a> | 2018-08-28         | <a href="#">Southwest Alaska &amp; YK Delta</a>              |
| <a href="#">18053</a> | 2018-08-29         | <a href="#">Mackenzie Valley &amp; Upper Yukon Territory</a> |

26  
27  
28

**Table S4. ABoVE L-Band PolInSAR Campaign #4: September 2019**

| <b>Flight Plan</b>    | <b>Sortie Date</b> | <b>Regions Sampled<br/>(hyperlink to flight line map)</b>    |
|-----------------------|--------------------|--------------------------------------------------------------|
| <a href="#">19059</a> | 2019-09-04         | <a href="#">PAD &amp; Great Slave Lake 1</a>                 |
| <a href="#">19060</a> | 2019-09-05         | <a href="#">Great Slave Lake Region &amp; Scotty Creek</a>   |
| <a href="#">19061</a> | 2019-09-11         | <a href="#">Yellowknife – Fairbanks Transit</a>              |
| <a href="#">19062</a> | 2019-09-12         | <a href="#">Seward Peninsula &amp; NW Alaska</a>             |
| <a href="#">19063</a> | 2019-09-13         | <a href="#">North Slope Alaska</a>                           |
| <a href="#">19064</a> | 2019-09-14         | <a href="#">Interior Alaska</a>                              |
| <a href="#">19065</a> | 2019-09-16         | <a href="#">Mackenzie Valley &amp; Upper Yukon Territory</a> |
| <a href="#">19066</a> | 2019-09-17         | <a href="#">Southwest Alaska &amp; YK Delta</a>              |

29  
30  
31

**Table S5. ABoVE L-Band PolInSAR Campaign #5: August 2022**

| <b>Flight Plan</b>    | <b>Sortie Date</b> | <b>Regions Sampled</b>                       |
|-----------------------|--------------------|----------------------------------------------|
| <a href="#">22031</a> | 2022-08-14         | <a href="#">BERMS TomoSAR</a>                |
| <a href="#">22032</a> | 2022-08-15         | <a href="#">PAD &amp; Great Slave Lake 1</a> |

|                       |            |                                                              |
|-----------------------|------------|--------------------------------------------------------------|
| <a href="#">22033</a> | 2022-08-16 | <a href="#">Great Slave Lake Region &amp; Scotty Creek</a>   |
| <a href="#">22034</a> | 2022-08-18 | <a href="#">Yellowknife – Fairbanks Transit</a>              |
| <a href="#">22035</a> | 2022-08-19 | <a href="#">Seward Peninsula &amp; NW Alaska</a>             |
| <a href="#">22036</a> | 2022-08-20 | <a href="#">North Slope Alaska</a>                           |
| <a href="#">22037</a> | 2022-08-22 | <a href="#">Mackenzie Valley &amp; Upper Yukon Territory</a> |
| <a href="#">22038</a> | 2022-08-23 | <a href="#">Southwest Alaska &amp; YK Delta</a>              |
| <a href="#">22039</a> | 2022-08-24 | <a href="#">Interior Alaska</a>                              |
| <a href="#">22040</a> | 2022-08-25 | <a href="#">British Columbia</a>                             |

32  
33

**Table S6. ABoVE P-band PolInSAR Campaign #1: May-June 2017**

| <b>Flight Plan</b>    | <b>Sortie Date</b> | <b>Regions Sampled<br/>(hyperlink to flight line map)</b>            |
|-----------------------|--------------------|----------------------------------------------------------------------|
| <a href="#">17051</a> | 2017-05-22         | <a href="#">PAD-Transboundary Watershed</a>                          |
| <a href="#">17052</a> | 2017-05-23         | <a href="#">Great Slave Lake Region &amp; Upper Mackenzie Valley</a> |
| <a href="#">17053</a> | 2017-05-25         | <a href="#">Yellowknife – Fairbanks Transit</a>                      |
| <a href="#">17054</a> | 2017-05-26         | <a href="#">Interior &amp; Southwest Alaska</a>                      |
| <a href="#">17055</a> | 2017-05-27         | <a href="#">YK Delta &amp; NW Alaska</a>                             |
| <a href="#">17056</a> | 2017-05-29         | <a href="#">Seward Peninsula, NW Alaska &amp; Yukon Flats</a>        |
| <a href="#">17057</a> | 2017-06-05         | <a href="#">Mackenzie Valley &amp; Upper Yukon Territory</a>         |
| <a href="#">17058</a> | 2017-06-06         | <a href="#">North Slope Alaska</a>                                   |

34  
35  
36

**Table S7. ABoVE P-Band PolInSAR Campaign #2: August 2017**

| <b>Flight Plan</b>    | <b>Sortie Date</b> | <b>Regions Sampled<br/>(hyperlink to flight line map)</b>            |
|-----------------------|--------------------|----------------------------------------------------------------------|
| <a href="#">17075</a> | 2017-08-07         | <a href="#">BERMS &amp; Southern Boreal Forest</a>                   |
| <a href="#">17076</a> | 2017-08-08         | <a href="#">PAD-Transboundary Watershed &amp; Great Slave Lake 1</a> |
| <a href="#">17077</a> | 2017-08-09         | <a href="#">Great Slave Lake Region &amp; Upper Mackenzie Valley</a> |
| <a href="#">17078</a> | 2017-08-11         | <a href="#">Daring &amp; Yellowknife – Fairbanks Transit</a>         |
| <a href="#">17079</a> | 2017-08-13         | <a href="#">North Slope Alaska</a>                                   |
| <a href="#">17080</a> | 2017-08-14         | <a href="#">Southwest Alaska &amp; YK Delta</a>                      |
| <a href="#">17081</a> | 2017-08-15         | <a href="#">Delta Junction, AK tomoSAR</a>                           |
| <a href="#">17082</a> | 2017-08-17         | <a href="#">Seward Peninsula, NW Alaska, &amp; Yukon Flats</a>       |
| <a href="#">17083</a> | 2017-08-18         | <a href="#">Mackenzie Valley &amp; Upper Yukon Territory</a>         |

37  
38  
39

40 **Table S8. ABoVE P-Band PolInSAR Campaign #3: October 2017**

| Flight Plan           | Sortie Date | Regions Sampled<br>( <a href="#">hyperlink to flight line map</a> ) |
|-----------------------|-------------|---------------------------------------------------------------------|
| <a href="#">17109</a> | 2017-10-07  | <a href="#">North Slope Alaska</a>                                  |
| <a href="#">17110</a> | 2017-10-10  | <a href="#">Seward Peninsula</a>                                    |

41

42 **2 Alaskan Flight Lines**

43 The Alaskan SAR flight lines are broken into four  
 44 main regional collections: A1) North Slope Alaska,  
 45 A2) Seward Peninsula and Northwest Alaska, A3)  
 46 Eastern Interior, and A4) Southwest Alaska and the  
 47 Yukon-Kuskokwim Delta (**Figure S1**). Legacy L- and  
 48 P-band flight lines from the AirMOSS EV-S1  
 49 investigation [Allen et al. 2010; Moghaddam et al.  
 50 2016] in the Seward Peninsula, NW Alaska, and the  
 51 North Slope were adapted for ABoVE use. The P-  
 52 band acquisitions are designed to overlap with the  
 53 near field portions of the L-band lines. Line IDs for  
 54 the L-band and P-band flight lines differ slightly  
 55 because they acquire data with slightly different off-  
 56 nadir viewing geometries [Miller et al. 2019].  
 57 Acquisition of P-band flight lines in the central  
 58 Interior was not possible due to a military radar keep-  
 59 out zone centered near Clear, AK (**Figure S2**).  
 60

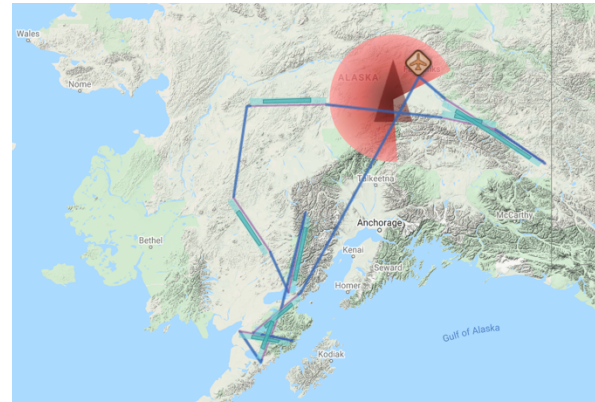

**Figure S2.** The military radar at Clear, AK creates a large P-band operations keep-out zone in the central Interior (red areas). The aircraft symbol marks our Fairbanks International Airport (PAFA) base of operations. Data acquisitions (blue bars) are from Flight Plan 17054. © Google Maps

## 61 2.1 Region A1: North Slope Alaska

62 **Figure S3** shows the flight  
63 lines for Region A1: North  
64 Slope Alaska. Details for  
65 individual L-band SAR flight  
66 lines are given in **Table S9**.  
67 The P-band flight line details  
68 are given in **Table S21**.  
69 The North Slope region  
70 features several important  
71 legacy flight lines established  
72 by AirMOSS (**Table S34**,  
73 **Table S35**). Of particular note  
74 are the lines covering  
75 Utqiagvik (Barrow, 15018)  
76 and the Dalton Highway from  
77 Deadhorse on the Arctic  
78 Coastal Plain to the Brooks  
79 Range foothills (18519). Both  
80 of these lines leverage long-  
81 term ground-based  
82 measurements and provide  
83 critical calibration and  
84 validation data for higher level  
85 data products.

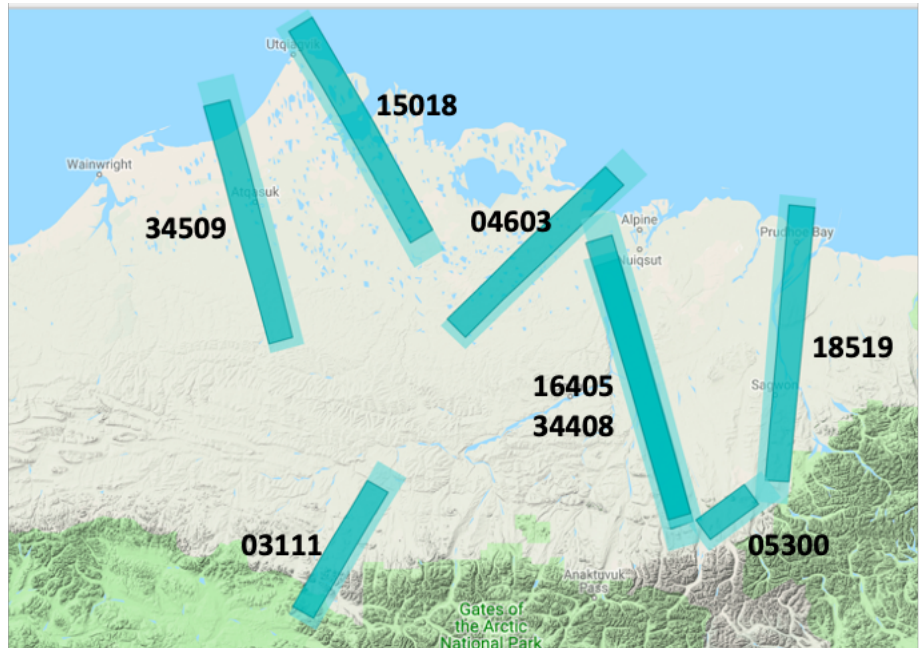

66 **Figure S3. L-band SAR flight lines (light blue bars) collected during ABoVE for Region A1: North Slope Alaska. Flight line IDs are listed next to each line. These lines provide regional sampling for many areas where ground-based measurements have characterized local landscapes such as Atqasuk (Line 34509), Utqiagvik (Line 15018), Deadhorse and the Dalton Highway (Line 18519), and Toolik Lake (Line 05300). © Google Maps**

87 **Line 03111: Ivotuk.** The Ivotuk flight line overlaps the legacy line 03109 (**Table S35**) and is anchored  
88 by the Ivotuk flux tower ([US-IVO](#)) [Zona et al. 2016; Davidson et al. 2017], a CALM 1 km grid  
89 (Ivotuk, site [U26](#)), and three GTN-P permafrost boreholes near Ivotuk. The flight line extends ~135 km  
90 from the southern edge of the Brooks Range foothills in the south to the Colville River in the north.  
91 Vegetation cover is mostly upland tundra with increasing soil saturation closer to the river.

93 **Line 34509: Atqasu.** The Atqasuk flight line overlaps the legacy line 34506 (**Table S35**) and is  
94 anchored by the Atqasuk flux tower ([US-ATQ](#)) [Zona et al. 2016], CALM 1 km grid at Atqasuk (site  
95 [U3](#)), and a UNAVCO GPS base station at Atqasuk. The flight line extends ~160 km from the southern  
96 edge of the Arctic Coastal Plain across the Meade River to the Arctic Ocean coast. It overflies  
97 numerous lakes with known CH<sub>4</sub> seeps [Walter Anthony et al. 2016]. Vegetation cover consists of  
98 mostly graminoid and tussock tundra with many dried lake beds distributed across the landscape.

00 **Line 15018: Barrow.** The Barrow (Utqiagvik) flight line overlaps the legacy line 15008 (**Table S35**). It  
01 is anchored by the extensive science infrastructure in and around the Barrow Peninsula including: DOE  
02 [NGEE-Arctic](#) experimental sites; Barrow area flux towers ([US-BRW](#), [US-BES](#), [US-BEO](#), [US-NGB](#))



03 [Oechel 2000; Dengel 2020]; the NEON Utqiagvik D18 tundra relocatable terrestrial site ([BARR](#)) and  
04 Airborne Observation Platform ([AOP](#)) box; the NOAA-CMDL Barrow Atmospheric Baseline  
05 Observatory ([BRW](#)); DOE Atmospheric Research and Monitoring [North Slope Alaska](#) (NSA) site;  
06 Barrow area CALM sites [U1](#) and [U2](#); a cluster of a dozen GTN-P boreholes on the Barrow Peninsula  
07 and one at Kuyanak (TSP.[814](#)); the Barrow Domain remotely sensed active layer thickness (ReSALT)  
08 time series [Schaefer et al. 2015; Liu et al. 2015a]; ground penetrating radar transects for active layer  
09 thickness and volumetric water content [Jafarov et al. 2017]; In situ soil moisture and thaw depth  
10 measurements [Wilson 2018]; and numerous long-term experimental plots. The flight line extends  
11 southeast ~165 km from Point Barrow over the Elson Lagoon and terminates south of Teshekpuk Lake.  
12 It samples a multitude of lakes, dry lakebeds, small rivers and tundra polygons.

13  
14 **Line 04063: Inigok.** The Inigok flight line is anchored by the CALM sites at Inigok ([U21](#)) and Fish  
15 Creek ([U22](#)) as well as GTN-P boreholes at North Inigok (NING, TSP.[813](#)), West Fish Creek 1 (FCK,  
16 TSP.[825](#)), Atigaru (ATI, TSP.[827](#)), and South Harrison (SOH, TSP.[828](#)). The flight line extends  
17 northeast ~150 km from the southern edge of the Arctic Coastal Plain to the Arctic Ocean coast halfway  
18 between Teshekpuk Lake and the Colville Delta.

19  
20 **Lines 34408 and 16405: AnaktE and AnaktW.** The Anaktuvuk flight lines map the 2007 Anaktuvuk  
21 River fire scar [Jones et al. 2009; Mack et al. 2011], running ~200 km from near Toolik Lake in the  
22 south to the Colville River in the north ([Figure S4](#)). The fire scar is bounded by the Anaktuvuk and  
23 Kuparuk Rivers on the east and west, respectively, and ranges from 15 to 20 km in width. More than  
24 50% of the area burned severely [Jones et al. 2009] and it is thought to be the largest Arctic tundra fire  
25 in the last 5,000 years [Hu et al. 2010]. Anchor points include three flux towers in the southern end of  
26 the scar [Rocha et al. 2011a,b], and numerous ABoVE field plots [Chen et al. 2016]. The spacing of the  
27 L-band flight lines is based on the narrower P-band swath and allows complete mapping of the  
28 complete fire scar by both L-band and P-band SARs. These lines are used to study changes in soil  
29 moisture, surface roughness, ALT, etc. in disturbed vs undisturbed areas. Interferometric SAR will be  
30 used to map surface elevation changes and track the evolution of permafrost degradation within the scar  
31 compared to LiDAR surface elevation data [Jones et al. 2015] and PALSAR time series [Liu et al. 2014;  
32 Iwahana et al. 2016].

33

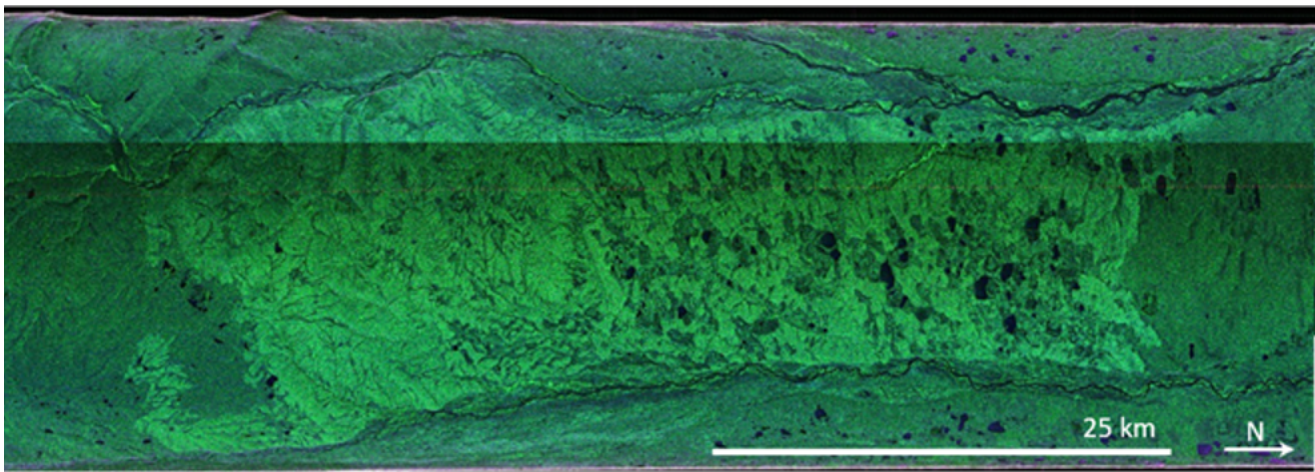

34  
35 **Figure S4. P-band PolSAR composite image showing complete mapping of the 2007 Anaktuvuk River fire scar (light**  
36 **green area in the center of the image) on 13 August 2017. Intrinsic resolution of the P-band PolSAR imagery is**  
37 **approximately 12 meters and reveals shaper features along the fire scar boundaries as well as indications of increased**  
38 **surface roughness and permafrost degradation within the fire scar compared to the adjacent undisturbed areas**  
39 **(darker green). Lakes, ponds, and rivers appear as black areas in this image.**  
40  
41

42 **Line 18519: Dhorse.** The Deadhorse flight line overlaps the legacy line 18516 (Table S35). It extends  
43 ~190 km from Prudhoe Bay south over the energy exploration infrastructure in Deadhorse and then  
44 south along the Dalton Highway. It is anchored by seven CALM sites, including the 1 km grids at West  
45 Dock (U5), Betty Pingo (U7A), and Happy Valley (U9B); the ReSALT thermokarst time series and  
46 GPR transects along the Pipeline approximately 15 km south of Deadhorse [Liu et al. 2015]; and myriad  
47 field sites that have been established adjacent to the highway over the years. In particular, ABoVE  
48 researchers monitored high resolution soil moisture and soil dielectric constant vertical profiles along  
49 the highway to validate L- and P-band retrievals of active layer properties [Chen et al. 2016; 2018; 2019  
50 a,b; Bakian-Dogaheh et al. 2020] and enable modeling [Yi et al. 2018]. Schaefer and coworkers also  
51 acquired numerous ground penetrating radar (GPR) transects to validate the ReSALT and airborne SAR  
52 active layer thickness retrieval algorithms [Chen et al. 2016].  
53

54 **Line 05300: Toolik.** The Toolik flight line extends ~80 km along the Dalton Highway from Pump  
55 Station #3 over Imnavait Creek to Toolik Lake. It is anchored by the extensive scientific infrastructure  
56 surrounding the [Arctic Long Term Ecological Research](#) (LTER) site at Toolik Lake; the NEON D18  
57 tundra sites Toolik (TOOL, core terrestrial), Oksrukuyik Creek (OKSR, core aquatic), and Toolik Lake  
58 (TOOK, relocatable aquatic) as well as the northern portion of the Toolik AOP flight box; CALM active  
59 layer thickness measurements at Imnaviat Creek WET (U11B) and MAT (U11C), Toolik MAT (U12B),  
60 and Toolik LTER (U13) as well as the Toolik 1 km grid (U12A); ground penetrating radar (GPR)  
61 [Gusmeroli et al. 2015; Chen et al. 2016]; in situ soil measurements including soil dielectric properties,  
62 temperature, and moisture profiles, ALT, and measurements of soil organic matter, bulk density,  
63 porosity, texture, and coarse root biomass [Bakian-Dogaheh et al. 2020]; in situ active layer thickness  
64 measurements [Chen et al. 2020]; high-resolution shrub biomass maps [Greaves et al. 2018]; and three

65 Innvait Creek flux towers [Euskirchen et al. 2012]. Road access and proximity to many long-term data  
 66 records made this a high priority area for many ABoVE field activities.

67  
 68  
 69

**Table S9. Region A1 (North Slope Alaska) L-band Line Summary Data**

| <b>Line ID</b> | <b>Short Name</b> | <b>Flight Plan</b>                                                                                                        | <b>Date</b>                                                        | <b>Comments</b>                                                                                                                                  |
|----------------|-------------------|---------------------------------------------------------------------------------------------------------------------------|--------------------------------------------------------------------|--------------------------------------------------------------------------------------------------------------------------------------------------|
| 03111          | Ivotuk            | <a href="#">22036</a><br><a href="#">19063</a><br><a href="#">17097</a><br><a href="#">17067</a>                          | 2022-08-20<br>2019-09-13<br>2017-09-15<br>2017-06-19               | Ivotuk flux tower, CALM site, GTN-P boreholes                                                                                                    |
| 34509          | Atqasu            | <a href="#">22036</a><br><a href="#">19063</a><br><a href="#">18050</a><br><a href="#">17098</a><br><a href="#">17069</a> | 2022-08-20<br>2019-09-13<br>2018-08-26<br>2017-09-16<br>2017-06-21 | Atqasuk flux tower; CALM site                                                                                                                    |
| 15018          | Barrow            | <a href="#">22036</a><br><a href="#">19063</a><br><a href="#">18050</a><br><a href="#">17098</a><br><a href="#">17069</a> | 2022-08-20<br>2019-09-13<br>2018-08-26<br>2017-09-16<br>2017-06-21 | Legacy line; NGEE-Artic, NEON, BEO flux towers, CALM sites                                                                                       |
| 04603          | Inigok            | <a href="#">22036</a><br><a href="#">19063</a><br><a href="#">18050</a><br><a href="#">17098</a><br><a href="#">17069</a> | 2022-08-20<br>2019-09-13<br>2018-08-26<br>2017-09-16<br>2017-06-21 | North Slope CALM sites, boreholes                                                                                                                |
| 34408          | AnaktE            | <a href="#">22036</a><br><a href="#">19063</a><br><a href="#">18050</a><br><a href="#">17098</a><br><a href="#">17069</a> | 2022-08-20<br>2019-09-13<br>2018-08-26<br>2017-09-16<br>2017-06-21 | Anaktuvuk River fire scar, eastern transect                                                                                                      |
| 16405          | AnaktW            | <a href="#">22036</a><br><a href="#">19063</a><br><a href="#">18050</a><br><a href="#">17098</a><br><a href="#">17069</a> | 2022-08-20<br>2019-09-13<br>2018-08-26<br>2017-09-16<br>2017-06-21 | Anaktuvuk River fire scar, western transect                                                                                                      |
| 18519          | Dhorse            | <a href="#">22036</a><br><a href="#">19063</a><br><a href="#">18050</a><br><a href="#">17098</a><br><a href="#">17069</a> | 2022-08-20<br>2019-09-13<br>2018-08-26<br>2017-09-16<br>2017-06-21 | North-South transect running from the Arctic Ocean coast through Deadhorse and south along the Dalton Highway; covers numerous calibration sites |

|       |        |                       |            |                                     |
|-------|--------|-----------------------|------------|-------------------------------------|
| 05300 | Toolik | <a href="#">22036</a> | 2022-08-20 | Toolik Lake Research area, NEON box |
|       |        | <a href="#">19063</a> | 2019-09-13 |                                     |
|       |        | <a href="#">18050</a> | 2018-08-26 |                                     |
|       |        | <a href="#">17098</a> | 2017-09-16 |                                     |
|       |        | <a href="#">17069</a> | 2017-06-21 |                                     |

70

71

72

73

## 2.2 Region A2: Seward Peninsula and the Northwest Interior

74

**Figure S5** shows the transects for Region A2: Seward Peninsula and the Northwest Interior. Details for

75

individual L-band SAR flight lines are given in

76

**Table S10**; the P-band acquisition details are

77

given **Table S22**. The Seward Peninsula region

78

features flight lines over the NGEE-Arctic

79

Council, Kougarok, and Teller watersheds where

80

intensive ground-based measurements provide

81

critical validation data for the SAR products as

82

well as other geophysical characterizations that

83

can be used to help contextualize the SAR data

84

[Wilson et al. 2018]. The other northwestern

85

Alaska flight lines extend the time series from

86

legacy acquisitions [**Table S34**, **Table S35**; Chen

87

et al. 2016] and surveys of fire disturbance in the

88

Noatak River Valley [Higuera et al. 2011].

89

**Line 25516: Huslia.** The Huslia flight line

90

overlaps the legacy line 25509 (**Table S35**).

91

Located south of Huslia, AK in the Koyukuk

92

NWR, it extends ~100 km parallel to the Yukon

93

River. It samples low mountains, taiga, and

94

boreal wetlands.

95

**Line 25517: Koyuk.** The Koyuk flight line overlaps the legacy line 25510 (**Table S35**). It starts about

96

60 km west of Koyukuk, AK and extends ~125 km over the coastal mountains to Koyuk, AK on Norton

97

Bay. It is anchored by the GTN-P borehole at Koyuk (TSP.[768](#)).

98

**Line 32519: Council.** The Council flight line overlaps the legacy line 32511 (**Table S35**). It extends

99

~160 km from Golovin, AK on the Norton Sound over Council and past Kougarok, AK into the heart of

00

the Seward Peninsula, overlapping with the Teller lines (04806 and 04901) near Kougarok, AK. It is

01

anchored by the DOE [NGEE-Arctic](#) Council watershed; CALM sites at Council ([U27](#)) and Kougarok

02

([U28](#)); GTN-P boreholes at White Mountain (TSP.[771](#)) and Last Bridge (TSP.[1188](#)); and the Council

03

flux tower ([US-NGC](#)) [Dengel et al. 2020]. Detailed digital elevation maps, soil moisture, active layer

04

05

06

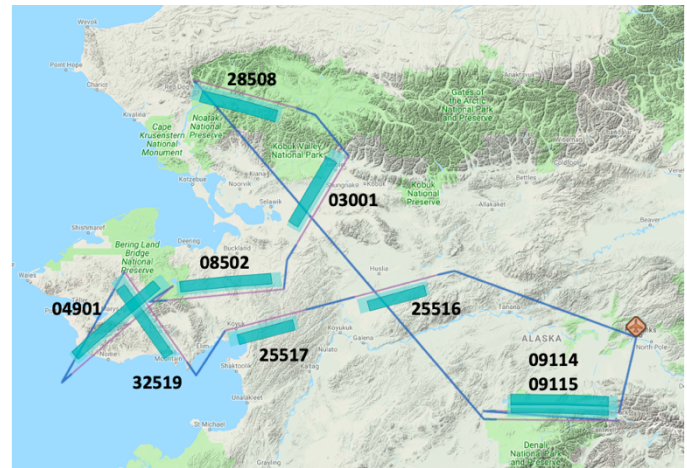

**Figure S5. L-band SAR flight lines (light blue bars) collected during ABoVE for Region A2: Seward Peninsula and Northwest Interior. Flight line IDs are listed next to each line. Flight lines 09114 and 09115 are part of the Eastern Interior (Region A3) collection but were acquired during this sortie due to extra available flight time. © Google Maps**

07 thickness, and surface classification data from the NGEE-Arctic team provide same day validation for  
08 the ABoVE airborne SAR measurements and joint analysis of these data constitute a major component  
09 of the ABoVE – NGEE-Arctic scientific partnership [Wilson et al. 2018].  
10

11 **Lines 04806 and 04901: Teller.** The Teller flight lines start in the Norton Sound just north of Sledge  
12 Island and extend inland ~190 km northeast past Kougarok towards Upper Hanum Creek, overlapping  
13 with the Council flight line (32519) near Kougarok. Flight line 04901 is anchored by the DOE [NGEE-](#)  
14 [Arctic](#) Teller and Kougarok watersheds; GTN-P boreholes at Pilgrim Hot Springs (TSP.[1803](#)), Kuzitin  
15 River (TSP.[1189](#)), and Last Bridge (TSP.[1188](#)). Flight line 04806 overflies the Teller watershed and the  
16 Kougarok ([U28](#)) CALM site. This line also captures fire scars in the Kougarok area [Liljedahl et al.  
17 2007; Iwahana et al. 2016; Tsuyuzaki et al. 2018]. Similar to the Council flight line (32519), these lines  
18 are key contributors to the ABoVE – NGEE-Arctic scientific partnership [Wilson et al. 2018].  
19

20 NOTE: In 2017 there was a mismatch between the P-band and the L-band lines covering the Teller and  
21 Kougarok sites due to geographic projection errors on the Seward Peninsula present in the online flight  
22 planning system. As a consequence, L-band line 04806 created for the 2017 campaign captured Teller  
23 to some extent but missed Kougarok entirely, and it did not align with P-band line 04900. To correct  
24 this error, we created L-band line 04901 which was properly aligned with P-band line 04900. L-band  
25 line 04901 was acquired in 2018 and 2019. We lost year-to-year change detections compared to L-band  
26 04806 but gained alignment with P-band 04900 and achieved better coverage of the NGEE-Arctic  
27 intensive field sites.  
28

29 **Line 08502: Kougar.** The Kougarok flight line overlaps the legacy line 08534 (**Table S35**). It extends  
30 ~145 km from the center of the Seward Peninsula to the edge of the western Interior. It overflies a mix  
31 of mountainous terrain and low-lying Bering Taiga.  
32

33 **Line 03001: Ambler.** The Ambler flight line overlaps the legacy line 03108 (**Table S35**). It starts about  
34 50 km southeast of Selawik, and extends ~145 km northeast past Ambler and into the southern Brooks  
35 Range. It is anchored by GTN-P boreholes at Kugurak Cabin Tundra (TSP.[1802](#)) and Ambler  
36 (TSP.[780](#)). This line samples areas of continuous permafrost.  
37

38 **Line 28508: Noatak.** The Noatak flight line travels ~100 km parallel to the southern edge of the Brooks  
39 Range along the upper Noatak River from Kelly Bar Airport to Mount Angayukaqaraq. This flight line  
40 monitors post-fire recovery recorded at ~80 ground plots [Loboda et al. 2017] and classified for  
41 fractional cover of fuel types [He et al. 2019a,b]. It was not collected in 2019.  
42  
43  
44  
45

**Table S10. Region A2: Seward Peninsula and Northwestern Interior L-band Line Summary Data**

| <b>Line ID</b> | <b>Short Name</b> | <b>Flight</b>                                                                                                             | <b>Date</b>                                                        | <b>Comments</b>                                                                           |
|----------------|-------------------|---------------------------------------------------------------------------------------------------------------------------|--------------------------------------------------------------------|-------------------------------------------------------------------------------------------|
| 25516          | Huslia            | <a href="#">22035</a><br><a href="#">19062</a><br><a href="#">18054</a><br><a href="#">17097</a><br><a href="#">17067</a> | 2022-08-19<br>2019-09-12<br>2018-09-01<br>2017-09-15<br>2017-06-19 | Interior Alaska, Huslia village                                                           |
| 25517          | Koyuk             | <a href="#">22035</a><br><a href="#">19062</a><br><a href="#">18054</a><br><a href="#">17097</a><br><a href="#">17067</a> | 2022-08-19<br>2019-09-12<br>2018-09-01<br>2017-09-15<br>2017-06-19 | Interior Alaska, boreal forest, coastal mountains                                         |
| 32519          | Council           | <a href="#">22035</a><br><a href="#">19062</a><br><a href="#">18054</a><br><a href="#">17097</a><br><a href="#">17067</a> | 2022-08-19<br>2019-09-12<br>2018-09-01<br>2017-09-15<br>2017-06-19 | NGEE-Arctic Council watershed and flux tower; Kougarok watershed                          |
| 04806          | Teller            | <a href="#">22035</a><br><a href="#">19062</a><br><a href="#">17097</a><br><a href="#">17067</a>                          | 2022-08-19<br>2019-09-12<br>2017-09-15<br>2017-06-19               | NGEE-Arctic Teller watershed, Kougarok watershed, Kougarok area fire disturbance/recovery |
| 04901          | Teller            | <a href="#">22035</a><br><a href="#">19062</a><br><a href="#">18054</a>                                                   | 2022-08-19<br>2019-09-12<br>2018-09-01                             | NGEE-Arctic Teller watershed, Kougarok watershed, Kougarok area fire disturbance/recovery |
| 08502          | Kougar            | <a href="#">22035</a><br><a href="#">19062</a><br><a href="#">18054</a><br><a href="#">17097</a><br><a href="#">17067</a> | 2022-08-19<br>2019-09-12<br>2018-09-01<br>2017-09-15<br>2017-06-19 | Seward Peninsula CALM sites, boreholes                                                    |
| 03001          | Ambler            | <a href="#">22035</a><br><a href="#">19062</a><br><a href="#">18054</a><br><a href="#">17097</a><br><a href="#">17067</a> | 2022-08-19<br>2019-09-12<br>2018-09-01<br>2017-09-15<br>2017-06-19 | Boreal forest-foothills gradient, boreholes                                               |
| 28508          | Noatak            | <a href="#">22035</a><br><a href="#">18054</a><br><a href="#">17097</a><br><a href="#">17067</a>                          | 2022-08-19<br>2018-09-01<br>2017-09-15<br>2017-06-19               | Fire disturbance/recovery                                                                 |

49 **2.3 Region A3: Eastern Interior**

50 **Figure S6** shows the transects for Region  
51 A3: The Eastern Interior. Details for  
52 individual L-band SAR flight lines are  
53 given in **Table S11**; the P-band  
54 acquisition details are given in **Table S23**.  
55 ABoVE flight lines in the Eastern Interior  
56 capture the dense concentration of  
57 ground-based science infrastructure  
58 including: the NEON sites at Delta  
59 Junction, AK, the Caribou/Poker Creek  
60 Research Watershed, and Healy, AK; the  
61 NSF Boreal Forest LTER site at Bonanza  
62 Creek; and National Park Service sites in  
63 the Denali National Preserve.

64 Additionally, the flight lines in the Yukon  
65 Flats NWR overlap legacy acquisitions of  
66 permafrost state [Minsley et al. 2012] as  
67 well as water surface elevation (WSE)  
68 observations by AirSWOT [Pitcher et al.

69 2019a,b]. ABoVE SAR data provide characterizations of the boreal forest and enable comparisons and  
70 fusion with the extensive airborne LiDAR data acquired throughout the Eastern Interior, particularly by  
71 NASA’s LVIS [Blair et al. 2018] and G-LiHT [Alonzo et al. 2020; Chen et al. 2020] systems. A  
72 detailed analysis of the tomographic SAR (tomoSAR) flights over Delta Junction, AK (**Table S12**,  
73 **Table S24**) is given in Section 6 of the main text.

74  
75 **Line 20026: Coldfo.** The Coldfoot flight line overlaps the legacy line 20015 (**Table S32**). It extends  
76 ~175 km from the southern edge of the Brooks Range near Linda Creek Airport southwest along the  
77 Dalton Highway over the villages of Coldfoot and Prospect Creek, terminating in the mountains north  
78 of the Yukon River. It is anchored by the CALM site at Old Man ([U16](#)) and GTN-P boreholes at  
79 Coldfoot (TSP.[834](#)) and Old Man (TSP.[749](#)). Vegetation is a combination of upland tundra and boreal  
80 forest covering discontinuous permafrost.

81  
82 **Lines 21508 YFlatW and 21609 YflatE; 04707: FtYuko.** These three flight lines survey the Yukon  
83 Flats NWR and its complex permafrost wetland systems. Flight lines 21508 and 21069 sample along  
84 AEM reconnaissance lines collected by Minsley et al. [2012] to characterize areas of continuous and  
85 discontinuous permafrost. Flight line 04707 covers the Fort Yukon area where Minsley et al. acquired  
86 high density AEM survey lines. These lines also overlap with the AirSWOT airborne Ka-band survey of  
87 over 3300 km<sup>2</sup> acquired in June 2015 [Pitcher et al. 2019a,b] and the ABoVE AirSWOT airborne Ka-  
88 band data acquired in June and Aug 2017 [Fayne et al. 2019, 2020; Kyzivat et al. 2019]. Extensive on-  
89 water validation data were acquired in 2017 and 2018.

90

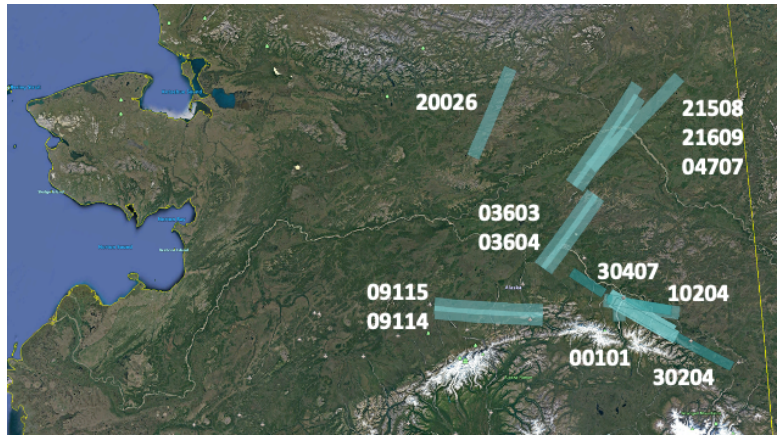

**Figure S6. L-band SAR flight lines (light blue bars) collected during ABoVE for Region A3: Eastern Interior. Flight line IDs are listed next to each line. Given the proximity to the PAFA base of operations, these flight lines were typically acquired on multiple sorties during each campaign. The Delta Junction tomoSAR flight lines (Table S12) overlap with the northern end of Line 30204. © Google Earth**

91 **Lines 03603 BonanW and 03604 BonanE.** The Bonanza Creek lines extend ~150 km over the city of  
92 Fairbanks, Alaska within the interior boreal forest, an area of discontinuous permafrost. This area  
93 supports extensive scientific infrastructure due to its proximity to Fairbanks and its road network.  
94 The lines are anchored by the Bonanza Creek Experimental Forest and Caribou Poker Creek Watershed  
95 (both associated with the NSF Bonanza Creek Long Term Ecological Research ([BNZ LTER](#)) area); the  
96 NEON D19 taiga field site at the Caribou-Poker Creek Research Watershed ([BONA](#)); the US Army  
97 Corps of Engineers Cold Regions Research and Engineering Laboratory ([CRREL](#)) [Permafrost Tunnel](#)  
98 [Research Facility](#) [Douglas et al. 2019; 2020; 2021]; multiple boreal flux towers (see [Euskirchen and  
99 Edgar 2014-2016a,b.; Euskirchen and Edgar, 2015-2016; Kobayashi et al. 2011]); and the NOAA  
00 Global Monitoring Laboratory Earth System Research Laboratories Tall Tower in Fox, AK ([CRV](#))  
01 [Karion et al. 2016]. Additional field measurements within the lines include multiple US Forest Service  
02 Cooperative Alaska Forest Inventory (CAFI) field sites [Malone et al. 2009]; measurements of carbon  
03 flux, winter respiration, and thaw depth [see Minions et al. 2019; and Natali et al. 2018]; numerous  
04 CALM sites; and a U.S. Climate Reference Network site ([Fairbanks 11 NE](#)). This region also contains a  
05 rich fire history with multiple burned areas. These survey lines have also been imaged by LVIS,  
06 AVIRIS, AirSWOT, CFIS and G-LiHT as part of the ABoVE airborne campaign [Miller et al. 2019].  
07

08 *Mitigation due to a no-fly implemented in 2022:* The BonanW\_03603 L-band flight line images ground  
09 sites where long-term observations are made by multiple state and federal agencies. ABoVE acquired L-  
10 band data along this flight line in 2017, 2018, and 2019, creating a time series that captures rapid  
11 change across these sites. Following the 2019 flights, a FAA no-fly zone centered on Murphy Dome  
12 was created at the request of DOD. ABoVE requested a waiver so that NASA could continue this time  
13 series of airborne observations with L-band SAR flights in August 2022. The request was not granted.  
14 Consequently, we designed two new lines to mitigate the impact of the exclusion zone and to cover the  
15 established ground sites: **BonanW\_03603b** and **BonanA\_05605**. BonanW\_03603b is a shorter version  
16 of BonanW\_03603. Data acquired in 2022 (and any subsequent years) image about 86 km of the  
17 northeast end of the original line and are suitable for InSAR or other intercomparisons with pre-2022  
18 acquisitions of bonanW\_03603. BonanA\_05605 covers the ground sites that were lost from the  
19 southwest end of BonanW\_03603, but at a different look angle. BonanA\_05605 also provides a new  
20 look angle for some of the key sites imaged in BonanE\_03604.  
21

22 **Lines 09115: DenalN and 09114: DenalS.** The Denali lines run east-west for ~180 km from near Lake  
23 Minchumina in the west, across the Denali National Preserve, and past Healy, AK. These lines are  
24 anchored by vegetation structure and composition inventory and monitoring sites managed by the  
25 National Park Service (<https://www.nps.gov/im/cakn/dena.htm>); the NEON D19 taiga field site at  
26 Healy, AK ([Healy](#)); and the Eight Mile Lake flux tower ([US-EML](#); Schuur 2008-). The SAR  
27 acquisitions support ABoVE field teams investigating winter respiration [Minions et al. 2019; and  
28 Natali et al. 2018] and permafrost dynamics [Schuur et al. 2009; Natali et al. 2014; Plaza et al. 2019].  
29

30 **Lines 00101: DJNEON, 30407: DeltJA, 10204: DeltJB, and 30204: DeltJC.** The Delta Junction lines  
31 survey extensively studied boreal forest sites in Interior Alaska clustered near Delta Junction, AK. This  
32 is an area of discontinuous permafrost extent with low ground ice content, blanketed by a mosaic of fire



33 disturbances. The Delta Junction lines are anchored by the NEON D19 taiga field site at Delta Junction,  
34 AK ([DEJU](#)); airborne electro-magnetic (AEM) surveys conducted by the Alaska Division of Geological  
35 and Geophysical Surveys [Burns et al. 2008]; and numerous US Forest Service Cooperative Alaska  
36 Forest Inventory (CAFI) field site locations [Malone et al. 2009]. Additionally, both L- and P-band  
37 tomoSAR data were acquired over Delta Junction to test boreal forest structural characterization  
38 algorithms (**Table S12**, **Table S24**). The tomoSAR data are detailed in Section 6 of the main text.

39

40 **Line 21612: HDZAOI (new in 2022).** The Husky Drop Zone line covers an area of interest ~25 km  
41 southeast of Fairbanks ([Figure S7](#)). The Husky Drop Zone exhibits signs of active permafrost  
42 degradation and disturbance (clearing) in the area has led to top-down thaw of permafrost. Drilling in  
43 the summer of 2022 confirmed that the top of near-surface permafrost in the Husky Drop Zone clearing  
44 is ~10m below the ground surface while the top of near-surface permafrost in undisturbed forested areas  
45 nearby is 1-3 m depth. Each summer new thaw pits are exposed and polygonal ground features expand.  
46 The area has been extensively studied by the US Army Corps of Engineers Cold Regions Research and  
47 Engineering Laboratory (CRREL) for the past ten years. Activities include repeat acquisitions of  
48 airborne LiDAR, electrical resistivity tomography, ground penetrating radar, drilling, and manual thaw  
49 depth measurements [Douglas et al. 2016].

50

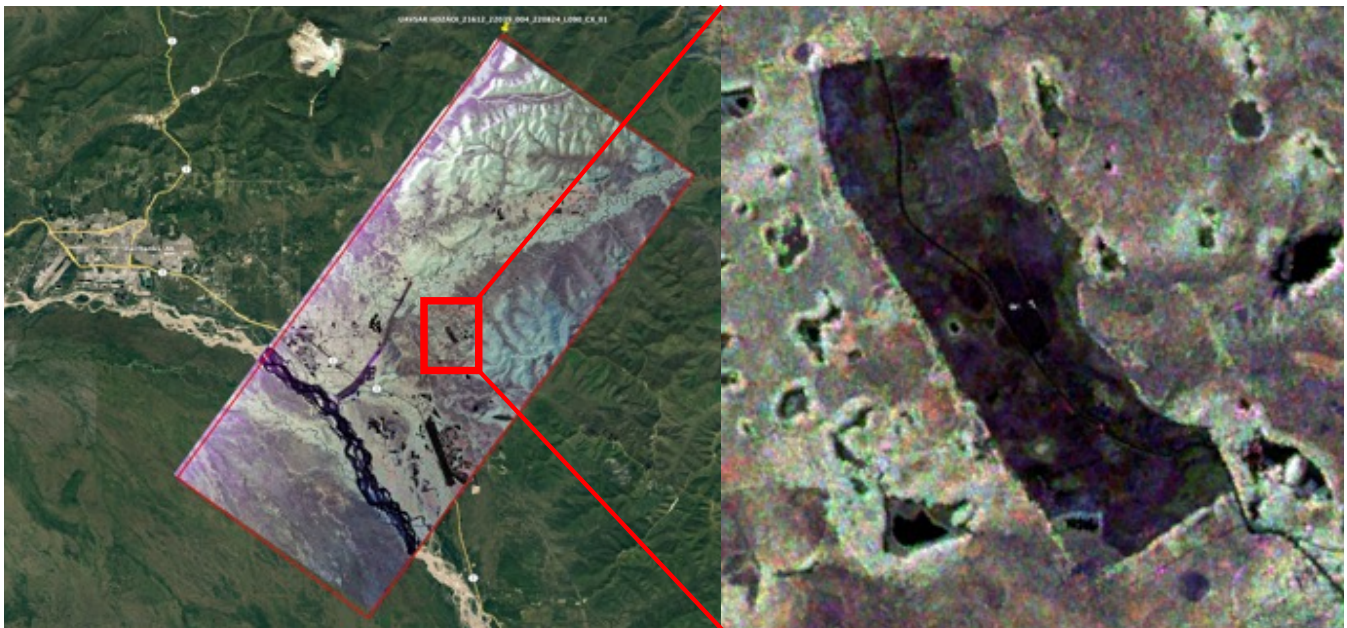

51

52

53

54

**Figure S7. LEFT: Quicklook image for the L-band SAR acquisition over Husky Drop Zone (HDZAOI\_21612). Fairbanks is seen on the left side of the image. RIGHT: Detail showing the distinctly different surface reflectance properties inside the HDZ due to permafrost degradation. The image is ~1000 m x 1000 m. © Google Earth.**

55

56

57

58

59 **Table S11. Region A3: Eastern Interior L-band Line Summary**

| <b>Line ID</b> | <b>Short Name</b> | <b>Flight Plan</b>                                                                                                                                                                                                            | <b>Date</b>                                                                                                                | <b>Comments</b>                                                                                                                                 |
|----------------|-------------------|-------------------------------------------------------------------------------------------------------------------------------------------------------------------------------------------------------------------------------|----------------------------------------------------------------------------------------------------------------------------|-------------------------------------------------------------------------------------------------------------------------------------------------|
| 20026          | Coldfo            | <a href="#">22036</a><br><a href="#">19063</a><br><a href="#">18050</a><br><a href="#">17097</a><br><a href="#">17067</a>                                                                                                     | 2022-08-20<br>2019-09-13<br>2018-08-26<br>2017-09-15<br>2017-06-19                                                         | CALM and GTN-P sites; tundra-taiga ecotone                                                                                                      |
| 21508          | YflatW            | <a href="#">22037</a><br><a href="#">19064</a><br><a href="#">17098</a><br><a href="#">17069</a>                                                                                                                              | 2022-08-22<br>2019-09-14<br>2017-09-16<br>2017-06-21                                                                       | Overlap with AEM surveys, AirSWOT and in situ water surface elevation measurements                                                              |
| 21609          | YflatE            | <a href="#">22037</a><br><a href="#">19064</a><br><a href="#">18051</a><br><a href="#">17098</a><br><a href="#">17069</a>                                                                                                     | 2022-08-22<br>2019-09-14<br>2018-08-27<br>2017-09-16<br>2017-06-21                                                         | Overlap with AEM surveys, AirSWOT and in situ water surface elevation measurements                                                              |
| 04707          | FtYuko            | <a href="#">22037</a><br><a href="#">19064</a><br><a href="#">18051</a><br><a href="#">17098</a><br><a href="#">17069</a>                                                                                                     | 2022-08-22<br>2019-09-14<br>2018-08-27<br>2017-09-16<br>2017-06-21                                                         | Overlap with AEM surveys, AirSWOT and in situ water surface elevation measurements                                                              |
| 03603          | BonanW            | <a href="#">22039</a><br><a href="#">19065</a><br><a href="#">19064</a><br><a href="#">19063</a><br><a href="#">19062</a><br><a href="#">19061</a><br><a href="#">18051</a><br><a href="#">17100</a><br><a href="#">17065</a> | 2022-08-24<br>2019-09-16<br>2019-09-14<br>2019-09-13<br>2019-09-13<br>2019-09-12<br>2018-08-27<br>2017-09-19<br>2017-06-16 | Bonanza Creek LTER site, LiDAR over burn recovery scars                                                                                         |
| 03604          | BonanE            | <a href="#">22039</a><br><a href="#">19064</a><br><a href="#">19063</a><br><a href="#">19062</a><br><a href="#">18051</a><br><a href="#">17100</a><br><a href="#">17065</a>                                                   | 2022-08-24<br>2019-09-14<br>2019-09-13<br>2019-09-13<br>2018-08-27<br>2017-09-19<br>2017-06-16                             | Bonanza Creek LTER site, LiDAR over burn recovery scars                                                                                         |
| 05605          | BNZalt            | <a href="#">22039</a>                                                                                                                                                                                                         | 2022-08-24                                                                                                                 | Additional Bonanza Creek area line collected in 2022 to mitigate against omissions in truncated line 03603 due to a temporary no broadcast rule |

|       |        |                                                                                                                                                                             |                                                                                                |                                                   |
|-------|--------|-----------------------------------------------------------------------------------------------------------------------------------------------------------------------------|------------------------------------------------------------------------------------------------|---------------------------------------------------|
| 09115 | DenalN | <a href="#">19064</a><br><a href="#">18052</a><br><a href="#">17100</a><br><a href="#">17066</a>                                                                            | 2019-09-14<br>2018-08-28<br>2017-09-19<br>2017-06-17                                           | National Park Service ground sites                |
| 09114 | DenalS | <a href="#">22039</a><br><a href="#">22038</a><br><a href="#">19064</a><br><a href="#">18052</a><br><a href="#">17100</a><br><a href="#">17065</a>                          | 2022-08-24<br>2022-08-23<br>2019-09-14<br>2018-08-28<br>2017-09-19<br>2017-06-16               | National Park Service ground sites                |
| 00101 | DJNEON | <a href="#">22034</a><br><a href="#">19064</a><br><a href="#">18051</a><br><a href="#">17095</a><br><a href="#">17064</a>                                                   | 2022-08-18<br>2019-09-14<br>2018-08-27<br>2017-09-10<br>2017-06-15                             | NEON D19 taiga field site near Delta Junction, AK |
| 30407 | DeltJA | <a href="#">22034</a><br><a href="#">19061</a><br><a href="#">18049</a><br><a href="#">17095</a><br><a href="#">17064</a>                                                   | 2022-08-18<br>2019-09-12<br>2018-08-24<br>2017-09-10<br>2017-06-15                             | Delta Junction, AK boreal forest                  |
| 10204 | DeltJB | <a href="#">22034</a><br><a href="#">19061</a><br><a href="#">18049</a><br><a href="#">17101</a><br><a href="#">17100</a><br><a href="#">17095</a><br><a href="#">17064</a> | 2022-08-18<br>2019-09-12<br>2018-08-24<br>2017-09-20<br>2017-09-19<br>2017-09-10<br>2017-06-15 | Delta Junction, AK boreal forest                  |
| 30204 | DeltJC | <a href="#">22034</a><br><a href="#">19061</a><br><a href="#">18052</a><br><a href="#">17100</a><br><a href="#">17066</a>                                                   | 2022-08-18<br>2019-09-12<br>2018-08-28<br>2017-09-19<br>2017-06-17                             | Delta Junction, AK boreal forest                  |
| 21612 | HDZAOI | <a href="#">22039</a>                                                                                                                                                       | 2022-08-24                                                                                     | Husky Drop Zone AOI – Permafrost degradation      |

60  
61  
62  
63  
64  
65  
66  
67  
68

69 **Table S12. Delta Junction L-band TomoSAR Flight Lines**

| <b>Line ID</b> | <b>Short Name</b> | <b>Flight Plan</b>    | <b>Date</b> | <b>Comments</b>            |
|----------------|-------------------|-----------------------|-------------|----------------------------|
| 12237          | DeltaA            | <a href="#">17101</a> | 2017-09-20  | TomoSAR offset 36 meters   |
| 30232          | DeltaA            | <a href="#">17101</a> | 2017-09-20  | TomoSAR offset 36 meters   |
| 12239          | DeltaC            | <a href="#">17101</a> | 2017-09-20  | TomoSAR offset 50 meters   |
| 30234          | DeltaC            | <a href="#">17101</a> | 2017-09-20  | TomoSAR offset 50 meters   |
| 12240          | DeltaD            | <a href="#">17101</a> | 2017-09-20  | TomoSAR offset 57 meters   |
| 30235          | DeltaD            | <a href="#">17101</a> | 2017-09-20  | TomoSAR offset 57 meters   |
| 12241          | DeltaE            | <a href="#">17101</a> | 2017-09-20  | TomoSAR offset 64 meters   |
| 30236          | DeltaE            | <a href="#">17101</a> | 2017-09-20  | TomoSAR offset 64 meters   |
| 12242          | DeltaF            | <a href="#">17101</a> | 2017-09-20  | TomoSAR offset 71 meters   |
| 30237          | DeltaF            | <a href="#">17101</a> | 2017-09-20  | TomoSAR offset 71 meters   |
| 12243          | DeltaG            | <a href="#">17101</a> | 2017-09-20  | TomoSAR offset 83 meters   |
| 30238          | DeltaG            | <a href="#">17101</a> | 2017-09-20  | TomoSAR offset 83 meters   |
| 30239          | DeltaH            | <a href="#">17101</a> | 2017-09-20  | TomoSAR offset 119 meters  |
| 12227          | DeltaR            | <a href="#">17101</a> | 2017-09-20  | TomoSAR Reference Line 41k |
| 30221          | DeltaR            | <a href="#">17101</a> | 2017-09-20  | TomoSAR Reference Line 41k |

70  
71  
72  
73  
74  
75

76 **2.4 Region A4: Southwest Alaska and the Yukon-Kuskokwim Delta**

77 **Figure S8** shows the transects for Region A4:  
78 Southwest Alaska and the Yukon-Kuskokwim  
79 Delta. Details for individual L-band flight  
80 lines are given in **Table S13**; the P-band  
81 acquisition details are given in **Table S25**.  
82 ABoVE surveys in southwest Alaska were  
83 anchored by climate monitoring sites from the  
84 Southwest Alaska Inventory & Monitoring  
85 Network ([SWAN](#)). SWAN consists of five  
86 parklands in Southwest Alaska: Alagnak  
87 National Wild River, Aniakchak National  
88 Monument and Preserve, Katmai National  
89 Park and Preserve, Kenai Fjords National  
90 Park, and Lake Clark National Park and  
91 Preserve [Bennett et al. 2006]. Surveys in the  
92 Yukon-Kuskokwim Delta were designed to  
93 capture field sites where ABoVE researchers  
94 were measuring the impacts of fire disturbance  
95 on active layer thickness, soil moisture, and  
96 other permafrost state variables [Liu et al.  
97 2014; Michaelides et al. 2019] as well as CO<sub>2</sub>  
98 and CH<sub>4</sub> fluxes [Natali et al. 2018]. The  
99 Innoko Flats NWR flight line in the lower Yukon Valley surveyed a vast palsa-wetlands complex with  
00 permafrost in various stages of degradation [Johnston et al. 2014; Jones et al. 2017]. The Poorman  
01 (08911) flight line covered a forested area of the western Interior with extensive tree ring data [Hoy et  
02 al. 2018].

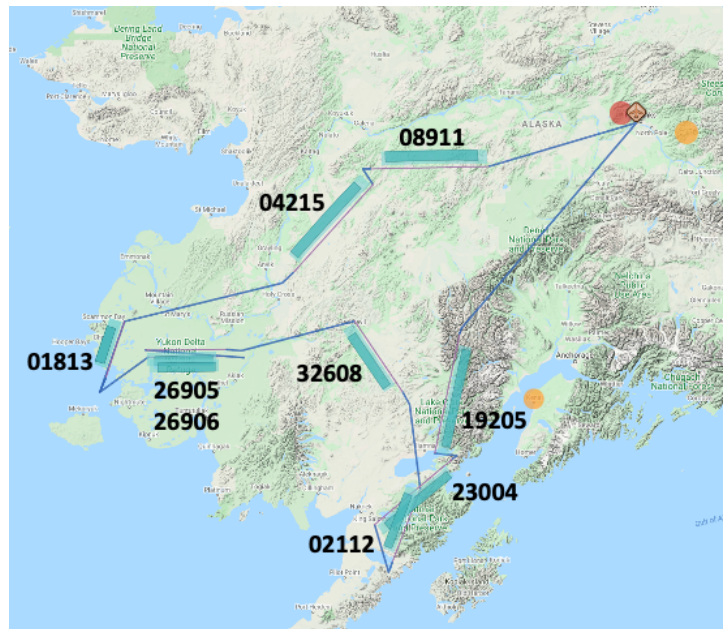

**Figure S8. Flight Plan 19066, flown 17 Sep 2019, showing the L-band SAR flight lines in Southwest Alaska and the Yukon-Kuskokwim Delta. Line 28020 (KatmaB) was omitted from this plan due to aircraft endurance limitations. © Google Maps**

03  
04 **Line 19205: Lclark** The Lake Clark line extends ~200 km from the Chigmit Mountains southwest  
05 across the Lake Clark National Park and Preserve to the shores of Iliamna Lake, terminating near  
06 Iliamna, AK. The line is anchored by the SWAN/Lake Clark inventory and monitoring sites ([LACL](#))  
07 and the U.S. CRN site at Port Alsworth, AK ([AK Port Alsworth 1 SW](#)). It is covered by an assortment  
08 of conifer forests, sedge meadows, salt marshes and lagoons.

09  
10 **Lines 23004: KatmaA; 28020: KatmaB; 02112: KatmaC** These three lines crisscross the Katmai  
11 National Park and Preserve, on the northern portion of the Alaska Peninsula, survey portions of two  
12 physiographic provinces—the Aleutian Range and the Nushagak-Bristol Bay Lowlands, and overpass  
13 the Naknek Lake. These lines are anchored by ~50 SWAN inventory and monitoring sites ([KATM](#)) and  
14 the [U.S. CRN](#) site at King Salmon, AK ([AK King Salmon 42 SE](#)). The 2022 Copper Creek fire  
15 destroyed one of the SWAN network sites in July 2022, but observations were continued and the 02112  
16 line captured immediate post-fire conditions in August 2022

17

18 **Line 32608: Sriver.** The Sleetmute line extends ~130 km from the Nushagak Hills of southern Alaska  
 19 northwest over the Kuskokwim and Holitna Rivers past Sleetmute, AK and terminates near Red Devil  
 20 Airport. This line is anchored by ~130 tree core sampling sites and supports boreal forest remote  
 21 sensing studies [Saatchi et al. 2019].

22  
 23 **Lines 26905 YKDelA and 26906 YKDelB.** The Yukon-Kuskokwim Delta lines extend ~130 km each,  
 24 surveying east-west transects of discontinuous permafrost in the Bering Tundra ecoregion northwest of  
 25 Bethel, AK. These lines are specifically designed to map large tundra fire scars from 2015 to evaluate  
 26 the impacts of fire on the permafrost state and carbon fluxes. The lines are anchored by CO<sub>2</sub> and CH<sub>4</sub>  
 27 summer flux and winter respiration measurements [Minions et al. 2019; and Natali et al. 2018]; ground  
 28 penetrating radar transects [Michaelides et al. 2019]; and vegetation composition across fire history  
 29 gradients [Frost et al. 2020].

30  
 31 **Line 01813: Chevak.** The Chevak line extends ~85 km from the Bering Sea coast just west of Hazen  
 32 Bay north over Chevak, AK across the Yukon-Kuskokwim Delta, ending just east of Scammon Bay.  
 33 The line is anchored by a 2009 LiDAR survey conducted for the US Fish and Wildlife Service  
 34 [Airborne Imaging, 2011] and field data collected in 2016 to map sporadic permafrost in the area  
 35 [Whitley et al. 2018a,b]. This region is defined by its flat coastal plain with elevated permafrost plateaus  
 36 throughout the floodplain and is a critical waterfowl habitat.

37  
 38 **Line 04215: Innoko** The Innoko line extends ~175 km northwest from Shageluk, AK across the Innoko  
 39 Flats National Wildlife Refuge. The line is anchored by field sites established to study permafrost thaw  
 40 chronosequences [Jorgenson 2013] and carbon fluxes [Johston et al. 2014; Jones et al. 2017]. Much of  
 41 the area is underlain by permafrost, and over half is covered by wetlands, thermokarst bogs, and fens  
 42 [Woodward et al. 2011]. Over 100,000 ha of the Lower Innoko River area burned in 2015 [Potter et al.  
 43 2018], making this an area for potential long-term study.

44  
 45 **Line 08911: Poorma** The Poorman line extends ~170km, starting south of the Yukon River near  
 46 Galena, AK and running west through discontinuous permafrost and boreal forest of the [Nowitna](#)  
 47 [National Wildlife Refuge](#), slightly north of the village of Poorman, AK. This line is anchored by more  
 48 than 250 tree core sampling sites [Hoy et al. 2018]. It is an acquisition of opportunity, lying along the  
 49 return route from the Yukon-Kuskokwim Delta back to Fairbanks, AK.

50  
 51 **Table S13. Region A4: Southwest Alaska and the Yukon-Kuskokwim Delta L-band Flight Line**  
 52 **Summary**

| Line ID | Short Name | Flight Plan           | Date       | Comments                                |
|---------|------------|-----------------------|------------|-----------------------------------------|
| 19205   | Lclark     | <a href="#">22038</a> | 2022-08-23 | National Park Service SWAN ground sites |
|         |            | <a href="#">19066</a> | 2019-09-17 |                                         |
|         |            | <a href="#">17099</a> | 2017-09-17 |                                         |
|         |            | <a href="#">17066</a> | 2017-06-17 |                                         |

|       |        |                                                                                                                           |                                                                    |                                                                                                                 |
|-------|--------|---------------------------------------------------------------------------------------------------------------------------|--------------------------------------------------------------------|-----------------------------------------------------------------------------------------------------------------|
|       |        | <a href="#">17065</a>                                                                                                     | 2017-06-16                                                         |                                                                                                                 |
| 23004 | KatmaA | <a href="#">22038</a><br><a href="#">19066</a><br><a href="#">17099</a><br><a href="#">17065</a>                          | 2022-08-23<br>2019-09-17<br>2017-09-17<br>2017-06-16               | National Park Service SWAN ground sites                                                                         |
| 28020 | KatmaB | <a href="#">17099</a><br><a href="#">17065</a>                                                                            | 2017-09-17<br>2017-06-16                                           | National Park Service SWAN ground sites                                                                         |
| 02112 | KatmaC | <a href="#">22038</a><br><a href="#">19066</a><br><a href="#">17099</a><br><a href="#">17065</a>                          | 2022-08-23<br>2019-09-17<br>2017-09-17<br>2017-06-16               | National Park Service SWAN ground sites                                                                         |
| 32608 | Sriver | <a href="#">22038</a><br><a href="#">19066</a><br><a href="#">18052</a><br><a href="#">17099</a><br><a href="#">17066</a> | 2022-08-23<br>2019-09-17<br>2018-08-28<br>2017-09-17<br>2017-06-17 | Snake River tree rings sampling                                                                                 |
| 26905 | YKDelA | <a href="#">22038</a><br><a href="#">19066</a><br><a href="#">18052</a><br><a href="#">17099</a><br><a href="#">17066</a> | 2022-08-23<br>2019-09-17<br>2018-08-28<br>2017-09-17<br>2017-06-17 | YK Delta 2015 fire scars; POLARIS portable flux towers/flux chambers; GPR transects; soil moisture measurements |
| 26906 | YKDelB | <a href="#">22038</a><br><a href="#">19066</a><br><a href="#">18052</a><br><a href="#">17099</a><br><a href="#">17066</a> | 2022-08-23<br>2019-09-17<br>2018-08-28<br>2017-09-17<br>2017-06-17 | YK Delta 2015 fire scars; POLARIS portable flux towers/flux chambers; GPR transects; soil moisture measurements |
| 01813 | Chevak | <a href="#">22038</a><br><a href="#">19066</a><br><a href="#">18052</a><br><a href="#">17099</a><br><a href="#">17066</a> | 2022-08-23<br>2019-09-17<br>2018-08-28<br>2017-09-17<br>2017-06-17 | YK Delta wildlife survey; USGS LiDAR survey; ground measurements                                                |
| 04215 | Innoko | <a href="#">22038</a><br><a href="#">19066</a><br><a href="#">18052</a><br><a href="#">17099</a><br><a href="#">17066</a> | 2022-08-23<br>2019-09-17<br>2018-08-28<br>2017-09-17<br>2017-06-17 | Permafrost surveys; extensive bog/fen/wetland complex                                                           |
| 08911 | Poorma | <a href="#">22038</a><br><a href="#">19066</a><br><a href="#">18052</a><br><a href="#">17099</a><br><a href="#">17066</a> | 2022-08-23<br>2019-09-17<br>2018-08-28<br>2017-09-17<br>2017-06-17 | Interior Alaska, boreal forest                                                                                  |

### 55 3 Canadian Flight Lines

56 The Canadian SAR flight lines ([Figure S1](#)) are broken into six regional collections: C1) Lower  
57 Mackenzie Valley and Northern Yukon Territory, C2) Southern Yukon Territory, C3) Upper Mackenzie  
58 Valley, C4) Great Slave Lake Region, C5) Transboundary Watershed, and C6) Southern Boreal  
59 Forest/BERMS. Legacy L- and P-band flight lines in the BERMS area from the CANEX 2010  
60 campaign [Magagi et al. 2012] and the AirMOSS EV-S1 investigation [Chapin et al. 2012; 2018]  
61 provide the potential to establish longer time series.

62

#### 63 3.1 Region C1: Lower Mackenzie Valley and Northern Yukon Territory

64 [Figure S9](#) shows the flight lines for Region C1: Lower Mackenzie Valley and Northern Yukon

65 Territory. Details for individual L-band  
66 PolInSAR flight lines are given in [Table S14](#); the  
67 P-band acquisition details are given in [Table S26](#).  
68 Region C1 features flight lines that overlap the  
69 Mackenzie River Valley transects for the CALM  
70 and GTN-P networks, annual GNWT/CFS forest  
71 health surveys, megaslumps on the Peel Plateau  
72 [Kokelj et al. 2015; Kokelj et al. 2017], and  
73 multiple legacy LiDAR surveys. The Mackenzie  
74 Delta and the Inuvik-Tuktoyaktuk corridor have  
75 been extensively targeted by RadarSat and  
76 RadarSat-2 [Touzi et al. 2019] and include the  
77 Havipak and Trail Valley Creek [Wilcox et al.  
78 2019; Walker et al. 2020] field sites. The lines in  
79 the northern Yukon Territory survey the Old  
80 Crow Flats/Porcupine River wetlands complex.

81

82 **Line 29904: Nwells.** The Norman Wells flight line begins about 20 km southeast of Tulita and extends  
83 ~225 km northwest along the Mackenzie River past Norman Wells and terminates north of Mountain  
84 River. It is anchored by CALM sites at Mountain River (thaw tube, [C9A](#)), Pump Station/Norman Wells  
85 ([C10](#)), Norman Wells grid and thaw tube ([C11](#)), and Great Bear River/Tulita ([C12](#)) as well as GTN-P  
86 boreholes clustered in and around Norman Wells: Pump Station-1 ([TSP.257](#)), KP2 offrow ([TSP.278](#)),  
87 KP5 offrow ([TSP.279](#)), Kee Scarp ([TSP.276](#), [TSP.288](#)), and Canyon Creek ([TSP.258](#), [TSP.259](#),  
88 [TSP.260](#), [TSP.261](#), [TSP.262](#)). Oil exploration and production facilities fan out from Norman Wells. The  
89 landscape is dominated by coniferous forest atop discontinuous permafrost.

90

91 **Line 32200: FtGood.** The Fort Good Hope flight line begins southeast of Fort Good Hope and then  
92 extends ~225 km northwest along the Mackenzie River past the bend at Thunder River. This flight line  
93 provides critical coverage of bioclimatic gradients along the lower Mackenzie River Valley even though  
94 there are no long-term monitoring sites in this transect. The landscape is dominated by coniferous forest  
95 atop discontinuous permafrost.

96

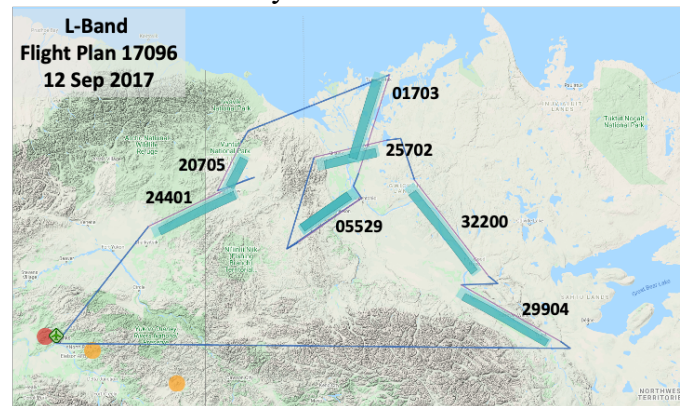

**Figure S9. L-band Flight Plan 17096 flown on 12 September, 2017 over Region C1. These lines cover the Lower Mackenzie Valley, the Mackenzie Delta, and the Old Crow/Porcupine River wetlands in the Northern Yukon Territory. © Google Maps**



97 **Line 25702: Aklavik.** The Aklavik flight line begins east of Inuvik and extends ~125 km west across  
98 the middle of the Mackenzie Delta past Aklavik and then onto the Peel Plateau. It is anchored by a 2008  
99 legacy LiDAR survey [Marsh et al. 2009] which can be used to assess changes over time in the digital  
00 elevation map [Whalen et al. 2009], water surface elevation [Hopkinson et al. 2011], and open water  
01 masks [Craστο et al. 2015] as well as to characterize vegetation cover gradients across the Delta and into  
02 the neighboring tundra environments. Comparisons are also possible with the extensive RadarSat and  
03 RadarSat-2 acquisitions.

04  
05 **Line 05529: FtMcPh.** The Fort McPherson flight line begins in the Yukon Territory, ~25 km east of  
06 Yukon – Northwest Territories border, then extends ~135 km northeast following the Dempster  
07 Highway across the Peel Plateau past Fort McPherson to the main channel of the Mackenzie River. It is  
08 anchored by a legacy LiDAR survey along the Dempster Highway [NWT Center for Geomatics,  
09 personal communication]. This line offers opportunities to quantify mass flow and expansion of the  
10 numerous megaslumps – retrogressive thaw slumps greater than 10 ha – that have formed in the Peel  
11 Plateau’s Stony Creek watershed as a result of catastrophic permafrost degradation [Kokelj et al. 2015;  
12 Kokelj et al. 2017]. Additionally, this flight line enables the study of the transition from dense boreal  
13 forest in the southern edge of the Mackenzie Delta to the tundra of the Peel Plateau. Of particular  
14 interest are the fluvial drainages that extend tree lined tendrils deeper into the Peel Plateau than  
15 observed in adjacent terrain. Access from the Dempster Highway to many sites along this flight line  
16 offer the potential for future ground-based work to complement the SAR acquisitions.

17  
18 **Line 01703: TukHwy.** The Tuktoyaktuk Highway flight line begins ~25 km southwest of Inuvik, NT  
19 then extends ~170 km northeast following the Inuvik-Tuktoyaktuk Highway past Tuktoyaktuk, NT to  
20 the Arctic Ocean. It is anchored by a series of RadarSat-2 acquisition tiles, a legacy LiDAR survey  
21 along the Highway [NWT Center for Geomatics, personal communication], and a legacy LiDAR survey  
22 over Trail Valley Creek [Marsh et al. 2010]. Intensive field data collections were conducted by  
23 members of the Canada Centre for Remote Sensing (CCRS) along the ITH in 2016 and again in 2017  
24 during the airborne P-band and L-band overflights. iButton temperature data loggers were installed in  
25 many sites along the ITH to measure the annual variations of near-surface soil temperature. These  
26 measurements enabled estimates of the active layer thickness [Zhang et al. 2021] and were combined  
27 with the field data collected in 2017 to validate the ALT retrievals from polarimetric L-band (ALOS2  
28 and UAVSAR) and P-band (AIRMOSS). Preliminary results using the Touzi decomposition (Touzi et  
29 al. 2009; 2021a) to analyze these data suggests that polarimetric L-band measurements permit the  
30 characterization of permafrost ALT at depths up to 50 cm, while P-band measurements permits the  
31 characterization of even deeper permafrost [Touzi et al. 2021b]. Similar results were found for  
32 enhanced mapping discontinuous permafrost and peatlands North Alberta [Touzi et al. 2018; 2019b].  
33 The airborne SAR data complement studies of Arctic Ocean shoreline degradation near Tuktoyaktuk  
34 [Banks et al. 2012; 2014] and lake drainage events [Marsh et al. 2009]. Tundra vegetation cover on the  
35 Tuktoyaktuk Peninsula has also been characterized using multi-frequency X-, C-, and L-bands  
36 [Ullmann et al. 2017]. This flight line also captures the Canadian Changing Cold Regions Network  
37 (CCRN) site at [Trail Valley Creek](#) and the [ShrubTundra](#) sites about 28 km north of Inuvik used to study  
38 shrub expansion [Myers-Smith et al. 2011]. Access from the Inuvik-Tuktoyaktuk Highway to many

39 sites along this flight line offer the potential for ground-based work to complement the SAR  
 40 acquisitions.

41  
 42 **Lines 20705: OldCrA and 24401: OldCrB.** The Old Crow A flight line travels ~80 km across the Old  
 43 Crow Flats, a Ramsar wetland of International Importance in the northern Yukon Territory, terminating  
 44 near the village of Old Crow, YT. This line covers multiple long-term field sites used to assess  
 45 thermokarst induced changes in lake area [Lantz et al. 2015]. The Old Crow B flight line originates  
 46 northeast of Old Crow and then extends ~185 km southwest along the Porcupine River towards  
 47 Chaklyitsik, AK.

48  
 49 **Table S14. Region C1: Lower Mackenzie Valley and Northern Yukon Territory L-band Flight**  
 50 **Line Summary**

| Line ID | Short Name | Flight Plan                                                                                                               | Date                                                               | Comments                                                                        |
|---------|------------|---------------------------------------------------------------------------------------------------------------------------|--------------------------------------------------------------------|---------------------------------------------------------------------------------|
| 29904   | Nwells     | <a href="#">17096</a><br><a href="#">17068</a>                                                                            | 2017-09-12<br>2017-06-20                                           | CALM and GTN-P borehole sites; oil exploration and production near Norman Wells |
| 32200   | FtGood     | <a href="#">22037</a><br><a href="#">19065</a><br><a href="#">17096</a><br><a href="#">17070</a><br><a href="#">17068</a> | 2022-08-22<br>2019-09-16<br>2017-09-12<br>2017-06-22<br>2017-06-20 | Boreal forest and fire disturbance; wetlands and water surface elevation (WSE)  |
| 25702   | Aklavi     | <a href="#">22037</a><br><a href="#">19065</a><br><a href="#">18053</a><br><a href="#">17096</a><br><a href="#">17070</a> | 2022-08-22<br>2019-09-16<br>2018-08-29<br>2017-09-12<br>2017-06-22 | Legacy LiDAR and RadarSat data; Makenzie Delta WSE                              |
| 05529   | FtMcPh     | <a href="#">22037</a><br><a href="#">19065</a><br><a href="#">18053</a><br><a href="#">17096</a><br><a href="#">17070</a> | 2022-08-22<br>2019-09-16<br>2018-08-29<br>2017-09-12<br>2017-06-22 | Legacy LiDAR data; retrogressive thaw megaslumps                                |
| 01703   | TukHwy     | <a href="#">22037</a><br><a href="#">19065</a><br><a href="#">18053</a><br><a href="#">17096</a><br><a href="#">17068</a> | 2022-08-22<br>2019-09-16<br>2018-08-29<br>2017-09-12<br>2017-06-20 | Legacy LiDAR and RadarSat data; Trail Valley Creek site; ShrubTundra sites      |
| 20705   | OldCrA     | <a href="#">22037</a><br><a href="#">19065</a><br><a href="#">18053</a><br><a href="#">17096</a><br><a href="#">17068</a> | 2022-08-22<br>2019-09-16<br>2018-08-29<br>2017-09-12<br>2017-06-20 | Long-term monitoring of thermokarst-driven lake change                          |
| 24401   | OldCrB     | <a href="#">22037</a>                                                                                                     | 2022-08-22                                                         | Old Crow; Porcupine River                                                       |

|  |  |                       |            |  |
|--|--|-----------------------|------------|--|
|  |  | <a href="#">19065</a> | 2019-09-16 |  |
|  |  | <a href="#">18053</a> | 2018-08-29 |  |
|  |  | <a href="#">17096</a> | 2017-09-12 |  |
|  |  | <a href="#">17068</a> | 2017-06-20 |  |

51  
52  
53

### 54 3.2 Region C2: Southern Yukon Territory

55 **Figure S10** shows the flight lines for  
56 Region C2: Southern Yukon Territory.  
57 Details for individual L-band SAR flight  
58 lines are given in **Table S15**; the P-band  
59 acquisition details are given in **Table S27**.  
60 These lines form a transect across the  
61 Boreal Montaigne ecoregion linking  
62 Boreal Interior (A3) and Continental  
63 Boreal (C3) – an important bioclimatic  
64 gradient. They also cover intensively  
65 studied field sites at Watson Lake, YT,  
66 Wolf Creek, YT, and Kluane Lake, YT.  
67 These lines are typically acquired during  
68 transit between Yellowknife, NT and  
69 Fairbanks, AK.

70  
71 **Line 27510: Watson.** This ~200 km

72 flight line is centered on Watson Lake, YT and travels east-west along the highway corridor. It is  
73 anchored by more than 50 permanent sampling plots from the Yukon Geological Survey Permafrost  
74 Monitoring Network [Lipovsky et al. 2014; Smith et al. 2017]. Land cover is predominantly boreal  
75 forest over sporadic discontinuous permafrost zone, where 10-50% of the terrain is underlain by  
76 permafrost, and permafrost appears to be degrading rapidly (mean annual temperature > -0.5° C)  
77 [Lipovsky et al. 2014].

78  
79 **Line 23602: WolfCr.** The Wolf Creek flight line extends for ~55 km over the [Wolf Creek Research](#)  
80 [Basin](#) just south of Whitehorse, YT. This line is anchored by the four Wolf Creek flux towers and three  
81 permanent sampling plots from the Yukon Geological Survey Permafrost Monitoring Network [Smith  
82 et al. 2017]. Surface land cover consists of dense boreal forest at lower elevations, sparse forest, open  
83 meadow and shrub tundra at the higher elevations, and exposed alpine areas with mostly bare rock at  
84 the highest elevations. The trees in the lower elevation forests are some of the largest in the ABoVE  
85 domain (R. Janowicz, personal communication). Similar to Watson Lake, permafrost appears to be  
86 degrading rapidly (mean annual temperature > -0.5° C). Drunken forests surrounding the Whitehorse  
87 monitoring station are additional visual indicators of thawing or degrading permafrost [Lipovsky et al.  
88 2014].

89  
90 **Lines 30806: KluanA and 01902: KluanB.** The Kluane Lake flight lines are anchored by the Kluane  
91 Lake Research Station ([KLRS](#)) [Danby et al. 2014]. Flight line 30806 extends ~120 km along the length  
92 of Kluane Lake along the Alaska Highway past Haines Junction. It captures ~20 permanent sampling  
93 plots from the Yukon Geological Survey Permafrost Monitoring Network [Smith et al. 2017] as well as  
94 forests recovering after devastating spruce beetle infestation in the 1990s [Campbell et al. 2019]. Flight  
95 line 01902 is oriented perpendicular to the southern edge of the lake and extends ~110 km into the

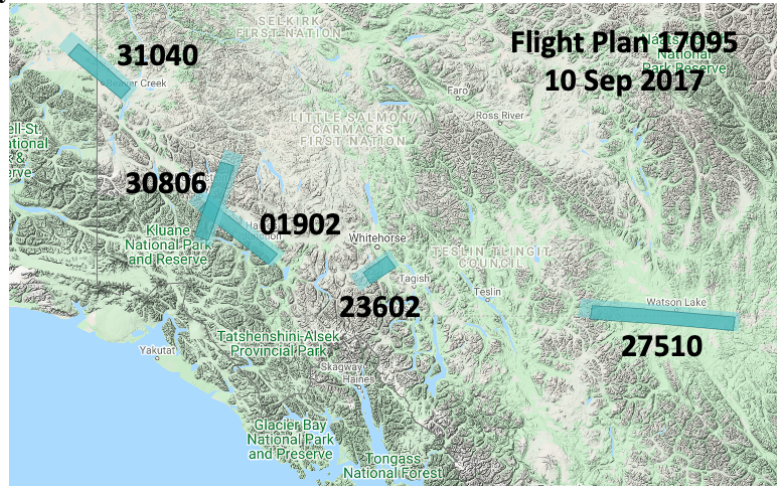

**Figure S10. Flight lines across the southern Yukon Territory (Region C2) link the Eastern Interior of Alaska (Region A3) with the upper Mackenzie River Valley in the Northwest Territories (Region C3). © Google Maps**

96 forest on the eastern shore. This line captures Hyperion and Landsat imagery that has been used to study  
97 forest structure and treeline dynamics [Danby et al. 2003]. It also captures the Kaskawulsh Glacier as it  
98 feeds Slims River and Kluane Lake (**Figure S11**).  
99  
00

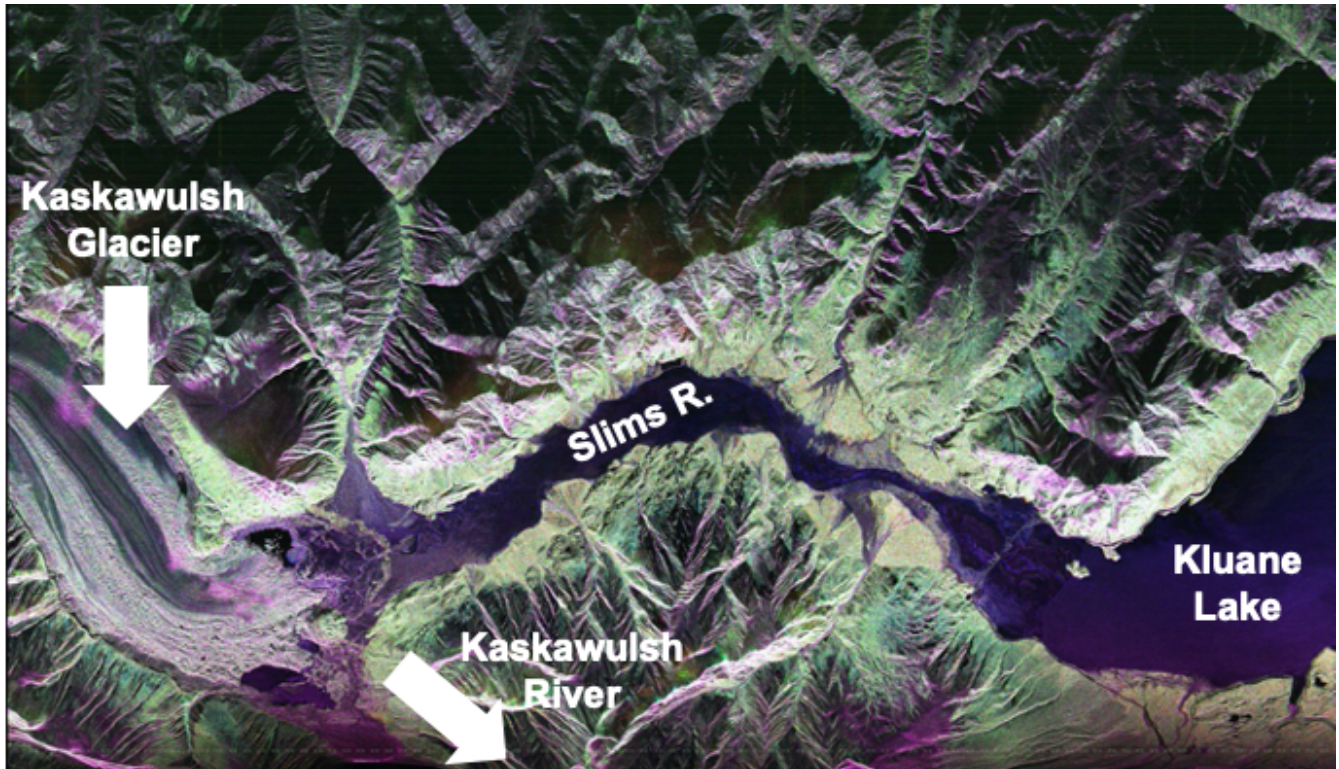

01  
02 **Figure S11.** L-band SAR imagery from line 01902 collected 15 June 2017 clearly shows water flowing from the  
03 Kaskawulsh Glacier into the Slims River and Kluane Lake. “River Piracy” occurred abruptly in Spring 2016 when  
04 the Kaskawulsh Glacier retreated, triggering a shift in its melt which began flowing into the Kaskawulsh River rather  
05 than the Slims River. This resulted in a drop of ~1 meter in Kluane Lake level and radically altered the regional  
06 drainage pattern [Shugar et al. 2017].  
07

08 **Line 31040: SnagYK.** The Snag flight line originates southeast of Snag, YT and travels ~95 km  
09 northwest along the Alaska Highway past Beaver Creek and across the border into Alaska. This line is  
10 anchored by five permanent sampling plots from the Yukon Geological Survey Permafrost Monitoring  
11 Network [Smith et al. 2017]. This line continues the series of flight lines that capture the bioclimatic  
12 gradients from Fairbanks, AK to Whitehorse, YT.  
13

14 **Lines 21611: GaribA and 03606 GaribB (new in 2022; not shown in Fig 9?).** At the request of The  
15 Geological Survey of Canada, we added two new lines in British Columbia as the NASA aircraft  
16 transitioned from the ABoVE domain back to AFRC in Palmdale CA (Lines GaribA\_21611 and  
17 GaribB\_03606). These lines run parallel to each other for ~150 km on a NE-SW course which surveys  
18 from the Squamish River Delta to Lillooet. These lines characterize a particularly valued corridor in the

19 Coast Mountains of BC that is defined by varied geology, receding alpine glaciers, active fluvial  
 20 processes, varied and changing vegetation. SAR imagery will be utilized by a variety of stake holders  
 21 for the assessment of volcanic risks, active faulting, rapid onset alpine geohazards and ongoing glacier  
 22 mass balance monitoring. Airborne hyperspectral imagery and LiDAR have been acquired over parts of  
 23 the corridor to explore glacier change and other active geological processes in the area. The flight path  
 24 prioritizes the high alpine setting including Warren Glacier, Overlord Glacier, Weart Glacier and Matier  
 25 Glacier which are presently undergoing rapid retreat as a consequence of recent climate change.

26  
27  
28

**Table S15. Region C2: Southern Yukon Territory L-band Flight Line Summary**

| Line ID | Short Name | Flight Plan                                                                                                               | Date                                                               | Comments                                                                   |
|---------|------------|---------------------------------------------------------------------------------------------------------------------------|--------------------------------------------------------------------|----------------------------------------------------------------------------|
| 27510   | Watson     | <a href="#">22034</a><br><a href="#">19061</a><br><a href="#">17095</a><br><a href="#">17064</a>                          | 2022-08-18<br>2019-09-12<br>2017-09-10<br>2017-06-15               | Watson Lake YT research nexus; YGS Permafrost Monitoring Network           |
| 23602   | WolfCr     | <a href="#">22034</a><br><a href="#">19061</a><br><a href="#">18049</a><br><a href="#">17095</a><br><a href="#">17064</a> | 2022-08-18<br>2019-09-12<br>2018-08-24<br>2017-09-10<br>2017-06-15 | Wolf Creek Research Basin; YGS Permafrost Monitoring Network               |
| 30806   | KluanA     | <a href="#">22034</a><br><a href="#">19061</a><br><a href="#">18049</a><br><a href="#">17095</a><br><a href="#">17064</a> | 2022-08-18<br>2019-09-12<br>2018-08-24<br>2017-09-10<br>2017-06-15 | Kluane Lake Research Station; legacy Hyperion data                         |
| 01902   | KluanB     | <a href="#">17095</a><br><a href="#">17064</a>                                                                            | 2017-09-10<br>2017-06-15                                           | Kluane Lake Research Station; legacy Hyperion data                         |
| 31040   | SnagYK     | <a href="#">22034</a><br><a href="#">18049</a><br><a href="#">17095</a><br><a href="#">17064</a>                          | 2022-08-18<br>2018-08-24<br>2017-09-10<br>2017-06-15               | Snag YT and Alaska/Canada border region; YGS Permafrost Monitoring Network |
| 21611   | GaribA     | <a href="#">22034</a>                                                                                                     | 2022-08-18                                                         | BC Coast Mountains; active faulting; glacier mass balance                  |
| 03606   | GaribB     | <a href="#">22034</a>                                                                                                     | 2022-08-18                                                         | BC Coast Mountains; active faulting; glacier mass balance                  |

29  
30

31 **3.3 Region C3: Upper Mackenzie Valley**

32 **Figure S12** shows the flight lines for Region C3: the Upper  
33 Mackenzie Valley. Details for individual L-band PolInSAR flight  
34 lines are given in **Table S16**; the P-band acquisition details are  
35 given in **Table S28**. The Upper Mackenzie Valley region features  
36 flight lines over long-term boreal forest inventory data from the  
37 Canadian Forestry Service’s CIPHA and HELCIA plots; long-  
38 term permafrost, hydrology and ecology time series records from  
39 the [CCRN](#) site at [Scotty Creek, NWT](#); and the [Scotty Creek](#) and  
40 [Smith Creek](#) flux towers. Together, these sites provide data  
41 critical to understanding the performance of airborne SAR for  
42 investigating boreal forests and peatlands.

43  
44 **Line 33021: Fliard.** This ~60 km flight line is centered on Fort  
45 Liard, NT and captures landscapes on either side of the Liard  
46 River. It is anchored by ~45 HELCIA and CFS NWT inventory  
47 plots. This line enables studies of boreal forest structure and  
48 above ground biomass in the most productive forests in the  
49 Northwest Territories [R. Hall, personal communication].  
50

51 **Lines 20027: ScottyIOP and 16713: Scotty.** These flight lines  
52 sample the [Scotty Creek Research Watershed](#) [Quinton et al.  
53 2019] and the surrounding taiga plains. Flight line 20027 extends  
54 northeast ~95 km from the British Columbia border and  
55 terminates east of Trout Lake, NT. It overflies remote sensing  
56 areas of interest (AOI) 9, 7, 6, and 5 established by the  
57 Consortium for Permafrost Ecosystems in Transition ([CPET](#)).  
58 Each of the AOIs has a 6 x 6 km<sup>2</sup> footprint. Imagery stacking over these sites includes recent Landsat  
59 (30 m resolution) and World View 1,2 (50 cm resolution) datasets and historical aerial photographs  
60 acquired in 1970/71 (1.2 m resolution). Detailed statistical characterization of the land covers within  
61 these AOIs is being developed at high resolutions, providing information on proportions of major land  
62 cover types and changes to the land cover types over a 40-year period. Flight line 16713 begins east of  
63 Trout Lake and extends northwest ~165 km towards Fort Simpson, NT overflying AOIs 6, 5, 4, 3, and 2  
64 as well as the Scotty Creek watershed and flux towers (Scotty Creek Landscape, [CA-SCC](#), and Scotty  
65 Creek Bog, [CA-SCB](#)). These lines will enable multi-disciplinary investigations into permafrost  
66 ecosystem vulnerability and change [Quinton et al. 2016].  
67

68 **Lines 17402: FtSimp and 15406: Wrigle.** Flight line 17402 starts north of Fort Simpson, NT, crosses  
69 the Mackenzie River between Miles 255 and 270, then extends north parallel to the river on the eastern  
70 bank to Mile 326. It is anchored by the Willowlake River CALM sites ([C14A,B](#)). Flight line 15406  
71 starts near Mile 336 and proceeds ~75 km northwest over Wrigley, NT. It is anchored by the Smith  
72 Creek flux tower ([CA-SMC](#)) and the Ochre River CALM site ([C13](#)). These lines link the Upper and

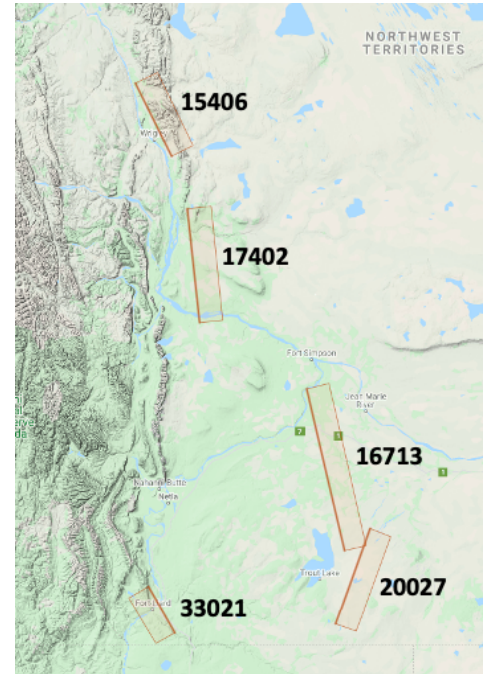

**Figure S12. Flight lines for the Upper Mackenzie Valley (Region C3) cover the flux towers at Scotty Creek (16713) and Smith Creek (17402) as well as the boreal forest near Fort Liard (33021), the most productive region in the NWT. © Google Maps**

73 Lower Mackenzie Valley (Region C1), defining a transect between the Taiga Plains and the Subarctic  
 74 Tundra ecoregions.

75

76

77 **Table S16. Region C3: Upper Mackenzie Valley L-band Flight Line Summary**

| Line ID | Short Name | Flight                                                                                                                    | Date                                                               | Comments                                                            |
|---------|------------|---------------------------------------------------------------------------------------------------------------------------|--------------------------------------------------------------------|---------------------------------------------------------------------|
| 33021   | Fliard     | <a href="#">22034</a><br><a href="#">19061</a><br><a href="#">17099</a><br><a href="#">17066</a><br><a href="#">17065</a> | 2022-08-18<br>2019-09-11<br>2017-09-17<br>2017-06-17<br>2017-06-16 | Fort Liard NT; HELCIA plots; highly productive boreal forest        |
| 16713   | Scotty     | <a href="#">22033</a><br><a href="#">19061</a><br><a href="#">17099</a><br><a href="#">17065</a>                          | 2022-08-16<br>2019-09-11<br>2017-09-17<br>2017-06-16               | Scotty Creek Research Watershed; permafrost monitoring; flux towers |
| 20027   | ScottyIOP  | <a href="#">22034</a><br><a href="#">17099</a><br><a href="#">17065</a>                                                   | 2022-08-18<br>2017-09-17<br>2017-06-16                             | Scotty Creek Intensive Observation sites near Trout Lake            |
| 17402   | FtSimp     | <a href="#">19066</a><br><a href="#">18052</a><br><a href="#">17099</a><br><a href="#">17066</a>                          | 2019-09-17<br>2018-08-28<br>2017-09-17<br>2017-06-17               | Fort Simpson NT area; HELCIA and CALM site                          |
| 15406   | Wrigle     | <a href="#">19066</a><br><a href="#">17099</a><br><a href="#">17065</a>                                                   | 2019-09-17<br>2017-09-17<br>2017-06-16                             | Wrigley NT area; Smith Creek flux tower; CALM site                  |

78

79



80 **3.4 Region C4: Great Slave Lake**  
81 **Region**

82 **Figure S13** shows the flight lines for  
83 Region C4: the Great Slave Lake Region.  
84 Details for individual L-band SAR flight  
85 lines are given in **Table S17**; the P-band  
86 acquisition details are given in **Table S29**.  
87 Many of these lines are anchored to road-  
88 accessible ground sites where research is  
89 being conducted on fire severity and the  
90 post-fire recovery of areas burned during  
91 the 2014-15 wildfire seasons [Walker et  
92 al. 2018a,b; 2019a,b; Bourgeau-Chavez et  
93 al. 2016, 2017, 2019a,b, French et al.  
94 2020a,b] as well as soil moisture, ALT,  
95 peatland mapping and biomass  
96 [Bourgeau-Chavez et al. 2016, 2017,  
97 2019a,b], and long-term boreal forest  
98 inventory data from the Canadian Forestry  
99 Service's CIPHA and HELCIA plots. Soil  
00 moisture was sampled for both L- and P-  
01 band at 6, 12, 20 and 50 cm depths  
02 [Bourgeau-Chavez et al. 2019, Schaefer  
03 XXX]. Other research in this area focuses  
04 on wetland inundation monitoring [French  
05 et al. 2018], lake and river WSE, studies  
06 of the tundra-taiga ecotone, and exploiting  
07 long term flux measurements at Daring  
08 Lake, NT ([CA-DL1](#), [CA-DL2](#)) [Lafleur et  
09 al. 2018; Meyer et al. 2020].

10  
11 **Line 03402: HayRiv.** The Hay River line  
12 begins southwest of Enterprise, NT, then  
13 follows the Mackenzie Highway and the river northeast for ~60 km, terminating at Hay River, NT on  
14 the shores of Great Slave Lake. It is anchored by numerous CIPHA and HELCIA plots, and caribou  
15 tracking data [Serrouya et al. 2021]. This line was added in 2019 to complement intensive field work  
16 [G. Castilla, private communication] and LiDAR acquisitions [C. Hopkinson, private communication]  
17 along the Hay River corridor.

18  
19 **Lines 11703: Kakisa1 and 34809: Kakisa2.** The Kakisa Lake lines were designed to cover sites where  
20 field work was conducted in peatlands and 2014-15 burn scars [Bourgeau-Chavez et al. 2016; 2017;  
21 2019a,b; Walker et al. 2019a,b]. Line 11703 follows NT Highway 1 from Enterprise, NT northwest for

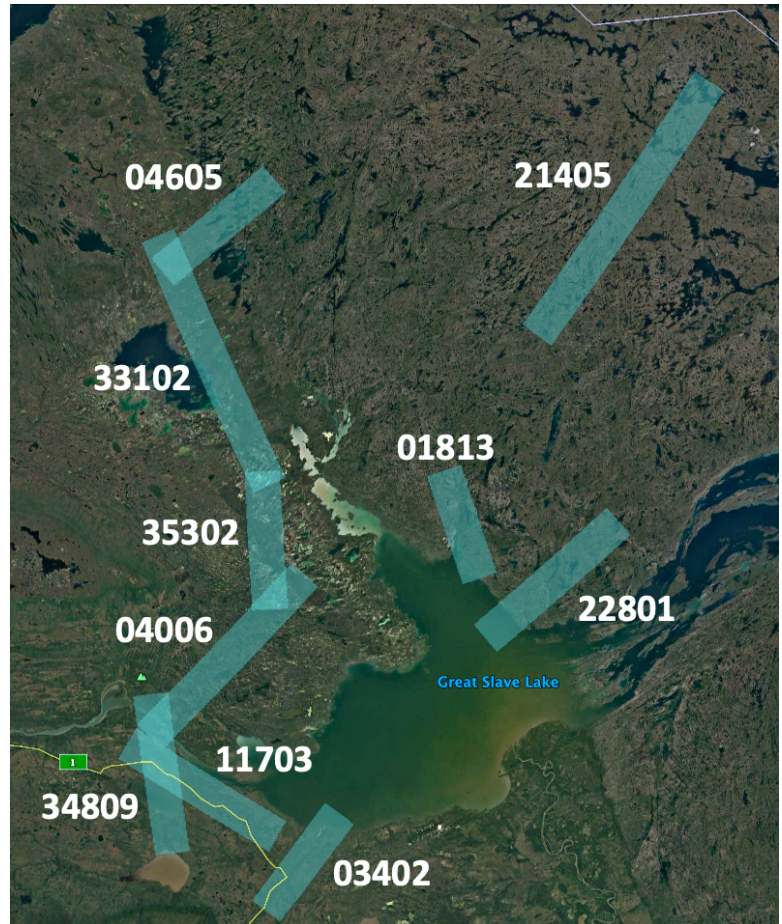

**Figure S13. L-band SAR lines in the Great Slave Lake Region (C4) sample fire disturbance, long-term forest inventory plots, the tundra-taiga ecotone (TTE), and water surface elevation in the boreal forest and onto the Canadian Shield. Extensive ground-based measurements are available to validate the airborne SAR collections. Multiple flight days are required to acquire all of these lines. © Google Earth**

22 ~110 km towards Fort Providence, NT. Line 34809 extends ~100 km north from the northern shore of  
23 Tathlina Lake over Kakisa Lake and ends north of Fort Providence. These lines overfly areas severely  
24 burned in the 2014 wildfire season. Ground sites include CFS HELCIA plots and burn study sites from  
25 various ABoVE. Preliminary analyses show changes in ALT and soil moisture within the burn scars  
26 compared to adjacent unburned areas [Schaefer et al. 2019].  
27  
28

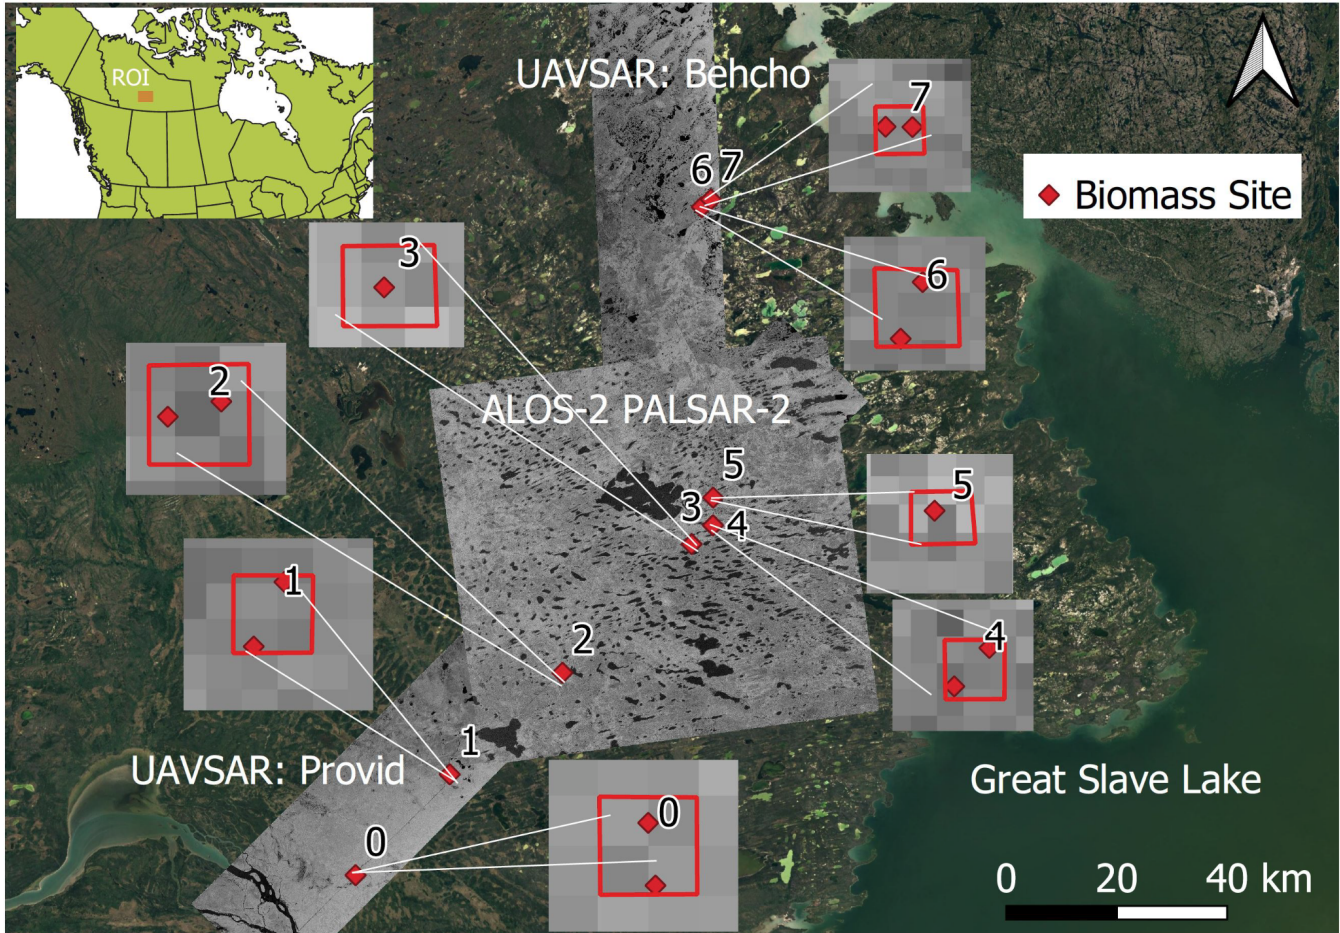

29  
30 **Figure S14.** The western extent of the Great Slave Lake region between Fort Providence (Line 0406) and Behchoko  
31 (Line 35302) was the focus of coordinated ground, satellite and airborne activities. This image shows the location of  
32 ground-validation sites for biomass and soil moisture with overlapping imagery obtained from ALOS-2 and  
33 UAVSAR L-band SAR observations. © Google Earth  
34

35 **Line 04006: FtProv.** This line originates southwest of Fort Providence, NT and extends ~140 km  
36 northeast along the Mackenzie Highway. It is anchored by numerous CFS long term forest inventory  
37 sites [Hoy et al. 2018] and electrical resistivity tomography (ERT) transects [M. Turetsky, private  
38 communication]. **Figure S14** shows that this line overflies areas severely burned in the 2014 wildfire  
39 season and was extensively sampled by ABoVE research teams [Bourgeau-Chavez et al. 2016, 2017,

40 2019a,b, 2021; Walker et al. 2019a,b]. Post fire vegetation changes have made this an attractive area for  
41 wintering woodland caribou [A. Kelly, private communication].

42

43 **Line 35302: Behcho.** The Behchoko line extends ~85 km on a north-south axis along the Mackenzie  
44 Highway to the west of Behchoko, NT. It overflies two severely burned areas from the 2014 wildfire  
45 season (**Figure S14**). It is anchored by ERT transects and long term forest inventory plots, and was  
46 extensively sampled by ABoVE research teams [Bourgeau-Chavez et al. 2016, 2017, 2019a,b, 2021;  
47 Walker et al. 2019a,b].

48

49 **Line 33102: SnareR.** This line follows the Snare River northwest for ~170 km from Great Slave Lake  
50 over the village of Whati, NT. Water surface elevation (WSE) investigations in this region inform  
51 hydroelectric power potential for Yellowknife, NT [A. Applejohn, private communication] and  
52 complement AirSWOT acquisitions [Pitcher et al. 2019a,b; Kyzivat et al. 2020]. In situ measurements  
53 have been collected to validate ABoVE SAR soil moisture and ALT products [Schaefer et al. 2019].  
54 The Snare River line was not acquired in 2018.

55

56 **Line 04605: FaberL.** The Faber Lake line extends ~90 km across two large 2014 burned areas on the  
57 northern shore of Great Slave Lake. Field work by ABoVE research teams assessed the severity of the  
58 burns [Walker et al. 2019a,b]. The Faber Lake line was acquired only in 2017; it was replaced by higher  
59 priority acquisitions.

60

61 **Line 21405: Daring.** The Daring Lake flight line extends nearly 200 km southwest from the Daring  
62 Lake Tundra Ecosystem Research Station ([TERS](#)) across the Canadian Shield. It is anchored by TERS  
63 field sites and flux towers ([CA-DL1](#), [CA-DL2](#)) [Lafleur et al. 2018; Meyer et al. 2020]. This line  
64 complements AirSWOT acquisitions [Pitcher et al. 2019a,b; Kyzivat et al. 2020] and creates a transect  
65 across the tundra-taiga transition. The Daring Lake line was not acquired in 2018.

66

67 **Line 22801: Yellow.** This line southeast of Yellowknife extends ~110 km from Great Slave Lake  
68 northeast. It is anchored by a number of Northern Contaminated Sites Program ([INAC](#)) mine  
69 remediation sites [Hoy et al. 2018] as well as peatland and fire disturbance ground sites [Bourgeau-  
70 Chavez et al. 2016, 2017, 2019a,b, 2021; Walker et al. 2019a,b; French et al. 2020a,b]. These sites are  
71 accessible via helicopter, floatplane, or boat. The Yellowknife line was not acquired in 2018.

72

73 **Line 16008: BakerC.** This line begins north of the Yellowknife airport and extends ~60 km to the  
74 southeast. It is anchored by long-term hydrological monitoring sites associated with the Baker Creek  
75 Research Watershed [Spence et al. 2018], as well as a short-term study of water-inundated vegetation  
76 [B. Chapman, personal communication, French et al. 2018]. Acquisitions for the Baker Creek line  
77 began in 2018; it was not acquired in 2017 and, therefore, has no P-band counterpart.

78

79

80

81

**Table S17. Region C4: Great Slave Lake Region L-band Flight Line Summary**

| <b>Line ID</b> | <b>Short Name</b> | <b>Flight Plan</b>                                                                                                                                                          | <b>Sortie Date</b>                                                                             | <b>Comments</b>                                                                        |
|----------------|-------------------|-----------------------------------------------------------------------------------------------------------------------------------------------------------------------------|------------------------------------------------------------------------------------------------|----------------------------------------------------------------------------------------|
| 03402          | HayRiv            | <a href="#">22032</a><br><a href="#">19060</a>                                                                                                                              | 2022-08-15<br>2019-09-05                                                                       | Canadian Forest Service Permanent Sampling Plots near Highway NT 2 along the Hay River |
| 11703          | KakisaA           | <a href="#">22033</a><br><a href="#">19060</a><br><a href="#">18048</a><br><a href="#">17094</a><br><a href="#">17063</a>                                                   | 2022-08-16<br>2019-09-05<br>2017-08-22<br>2017-09-09<br>2017-06-14                             | Burn study sites near Kakisa Lake                                                      |
| 34809          | KakisaB           | <a href="#">22032</a><br><a href="#">19060</a><br><a href="#">18048</a><br><a href="#">17094</a><br><a href="#">17063</a>                                                   | 2022-08-15<br>2019-09-05<br>2017-08-22<br>2017-09-09<br>2017-06-14                             | Burn study sites near Kakisa Lake                                                      |
| 04006          | Provid            | <a href="#">22032</a><br><a href="#">19060</a><br><a href="#">19059</a><br><a href="#">18048</a><br><a href="#">18047</a><br><a href="#">17094</a><br><a href="#">17063</a> | 2022-08-15<br>2019-09-05<br>2019-09-04<br>2017-08-22<br>2017-08-21<br>2017-09-09<br>2017-06-14 | Burn study sites accessible from Highway NT 3 near Fort Providence                     |
| 35302          | Behcho            | <a href="#">22032</a><br><a href="#">19060</a><br><a href="#">18048</a><br><a href="#">17094</a><br><a href="#">17063</a>                                                   | 2022-08-15<br>2019-09-05<br>2017-08-22<br>2017-09-09<br>2017-06-14                             | Burn study sites accessible from Highway NT 3 near Behchoko                            |
| 33102          | SnareR            | <a href="#">19060</a><br><a href="#">17094</a><br><a href="#">17063</a>                                                                                                     | 2019-09-05<br>2017-09-09<br>2017-06-14                                                         | Snare River hydrology and water surface elevation                                      |
| 04605          | FaberL            | <a href="#">17094</a><br><a href="#">17063</a>                                                                                                                              | 2017-09-09<br>2017-06-14                                                                       | Faber Lake burn study sites                                                            |
| 21405          | Daring            | <a href="#">22033</a><br><a href="#">19060</a><br><a href="#">17094</a><br><a href="#">17063</a>                                                                            | 2022-08-16<br>2019-09-05<br>2017-09-09<br>2017-06-14                                           | Taiga-tundra transition from Yellowknife to the Daring Lake Research Station           |
| 22801          | Yellow            | <a href="#">22033</a><br><a href="#">19059</a><br><a href="#">17094</a><br><a href="#">17063</a>                                                                            | 2022-08-16<br>2019-09-04<br>2017-09-09<br>2017-06-14                                           | Burn study sites southeast of Yellowknife                                              |

|       |        |                       |            |                                                              |
|-------|--------|-----------------------|------------|--------------------------------------------------------------|
| 16008 | BakerC | <a href="#">22032</a> | 2022-08-15 | Baker Creek Watershed sites north of the Yellowknife Airport |
|       |        | <a href="#">19060</a> | 2019-09-05 |                                                              |
|       |        | <a href="#">19059</a> | 2019-09-04 |                                                              |
|       |        | <a href="#">18048</a> | 2018-08-22 |                                                              |
|       |        | <a href="#">18047</a> | 2018-08-21 |                                                              |

83  
84  
85  
86  
87  
88  
89  
90

91 **3.5 Region C5: Peace-Athabasca Delta (PAD) and the Trans-Boundary Watershed**

92 **Figure S15** shows the L-band SAR flight lines  
93 for the Peace-Athabasca Delta and Transboundary  
94 Watershed (Region C5). These flight lines extend  
95 from the Peace-Athabasca Delta in northern  
96 Alberta to the Slave River Delta near Fort  
97 Resolution, NT on the southern shore of Great  
98 Slave Lake. Details for individual L-band SAR  
99 flight lines are given in **Table S18**; the P-band  
00 acquisition details are given in **Table S30**.

01  
02 Multiple ABoVE research groups and Canadian  
03 partner organizations engage in research projects  
04 across the Peace-Athabasca Delta (PAD) and the  
05 Slave River watershed. The PAD has been  
06 declared a Ramsar Convention Wetland and a  
07 UNESCO World Heritage site based on its high  
08 biological diversity. The Slave River and Delta  
09 are monitored under the [NWT Water Stewardship  
10 Strategy](#), in which Traditional Knowledge and  
11 western science are merged to create state of the  
12 art understanding of the hydrology, ecology, and  
13 biodiversity of the Slave River watershed. The  
14 ABoVE flight lines were designed in close  
15 consultation with the GNWT Science Advisor to  
16 help quantify and understand trans-boundary  
17 water flow. The L-band SAR acquisitions  
18 described here complement the LVIS LiDAR and  
19 AirSWOT Ka-band, thermal and optical data acquired in 2017 to study trans-boundary WSE and  
20 hydrologic dynamics in detail [Fayne et al. 2019; Kyzivat et al. 2019] (See Section 8).

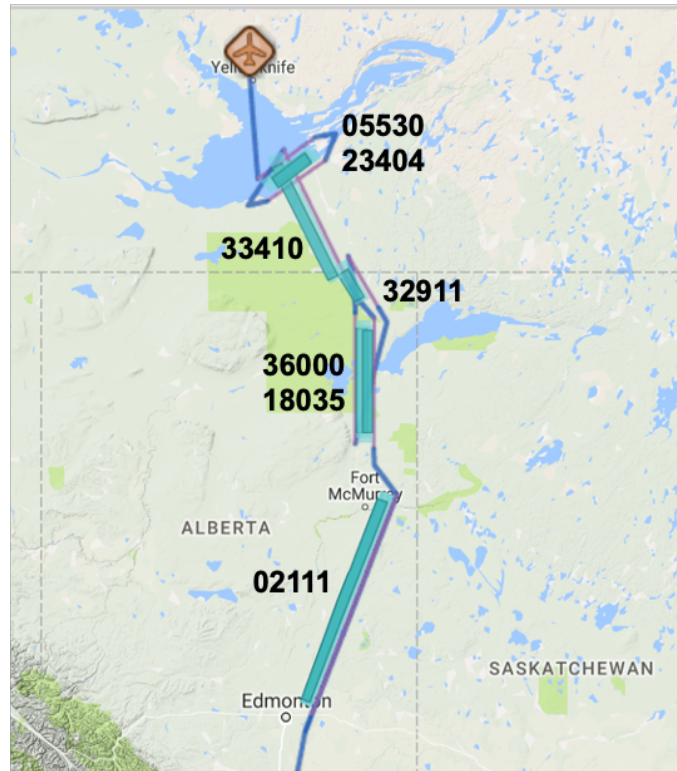

**Figure S15. L-band flight lines in the Transboundary Watershed sample from the Peace-Athabasca Delta along the Slave River to the Slave Delta on the on the southern shore of Great Slave Lake. These flight lines help characterize wetlands extent and type as well as water surface elevations. © Google Maps**

29  
30  
31  
32  
33  
34  
35  
36  
37  
38  
39  
40  
41  
42  
43  
44  
45  
46  
47  
48  
49  
50  
51  
52  
53  
54  
55  
56  
57  
58  
59  
60  
61  
62  
63  
64  
65  
66  
67  
68  
69  
70

**Lines 36000: PADeE and 18035: PADeW.**

The Peace-Athabasca Delta (PAD), a 5200 km<sup>2</sup> freshwater delta at the confluence of the Peace and Athabasca Rivers with Lake Athabasca (58.7N, 111.5W; **Figure S16**), is the largest inland river delta in the world, among the world's most globally significant boreal wetlands, and a critical habitat for millions of water fowl. Aside from some exposed bedrock features in the northern sector, the PAD consists of hundreds of interconnected wetlands, shallow lakes (<2 m depth), and active and relict distributary channels. [Pavelsky and Smith 2008]. The SAR flight lines are centered on the PAD and run north-south for ~180 km. Both L-band and P-band swaths were designed to overlap with AirSWOT Ka-band WSE data acquired in June and August 2017 [Miller et al. 2019; Fayne et al. 2019; Kyzivat et al. 2019]. The L-band swaths overlap substantially as they were placed for optimized near-field coverage of the narrower P-band and Ka-band swaths. ABoVE researchers coordinated on-water WSE and optical property measurements with the SAR swaths. **Figure S16** shows overlap of L-band image with on the water measurements made in August 2018. ABoVE researchers are also using the PAD L-Band SAR imagery to develop wetland waterfowl habitat classification methods [French et al. 2018].

**Lines 32911: FSmithS and 33410: FSmithN.**

The Fort Smith flight lines provide imagery of the Slave River from northern Alberta to the Great Slave Lake. Flight line 32911 starts about 40 km south of the Alberta-Northwest Territories border and follows the river north past Fort Smith, NT. Flight line 33410 continues the survey from the border to the Slave River Delta near Fort Resolution, NT, extending several kilometers into the Great Slave Lake to characterize Slave River outflow into the lake. These lines are anchored by numerous river gauges to calibrate WSE, and also a part of wetland waterfowl habitat assessment for ABoVE [French et al. 2018].

**Lines 05530: FtResS and Line 23404: FtResN.** The Fort Resolution flight lines are parallel transects designed to map the Slave River Delta. Each extends ~80 km perpendicular to the Slave River to map

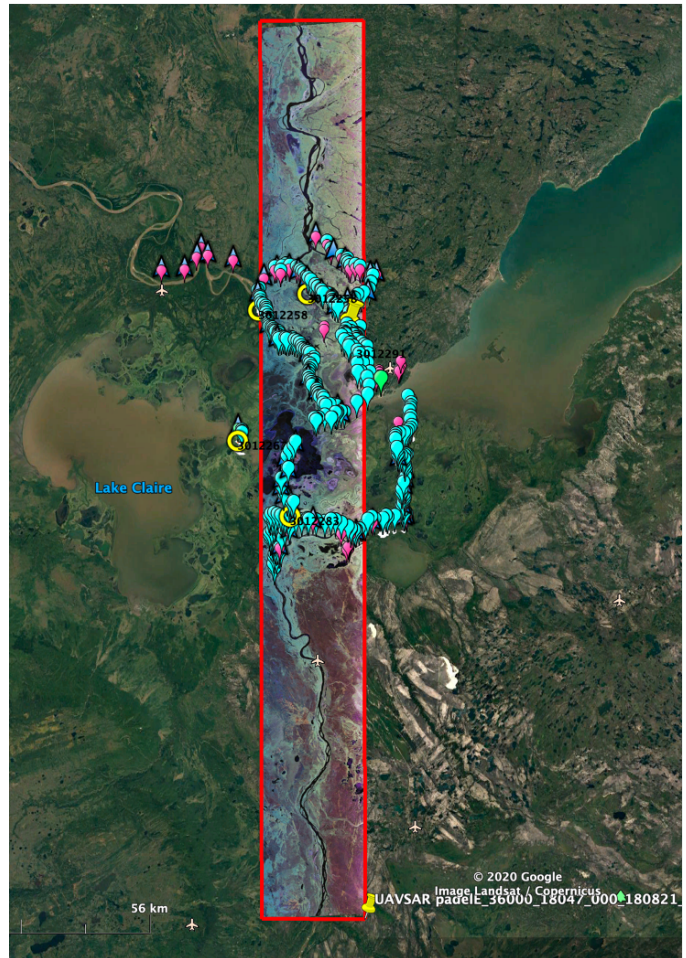

**Figure S16. L-band SAR flight line 36000 (PADeE) overlaps with on-water measurements made by ABoVE ecohydrology researchers [Smith-Pavelsky-Butman]. SAR data will help quantify water surface elevations (WSE) and provide wetlands classifications for the world's largest inland delta. © Google Earth**

71 the entire Fort Resolution Peninsula. As with the PAD flight lines 36000 and 18035, the spatial offset in  
 72 flight lines 05530 and 23404 optimizes overlap for the narrower P-band swath. The Slave River Delta is  
 73 a critical waterfowl habitat, and the SAR imagery will deliver important information on its structure and  
 74 interannual variability [French et al. 2018].

75  
 76  
 77  
 78

**Table S18. Region C5: Peace-Athabasca Delta and Trans-Boundary Watershed L-band Flight Line Summary**

| Line ID | Short Name | Flight                                                                                                                                             | Date                                                                             | Comments                                                                                                                         |
|---------|------------|----------------------------------------------------------------------------------------------------------------------------------------------------|----------------------------------------------------------------------------------|----------------------------------------------------------------------------------------------------------------------------------|
| 36000   | PADelE     | <a href="#">22033</a><br><a href="#">22032</a><br><a href="#">19059</a><br><a href="#">18047</a><br><a href="#">17093</a><br><a href="#">17062</a> | 2022-08-16<br>2022-08-15<br>2019-09-04<br>2018-08-21<br>2017-09-08<br>2017-06-13 | Water Surface Elevation (WSE) and habitat classification in the Peace-Athabasca Delta; overlap with AirSWOT Ka-band acquisitions |
| 18035   | PADelW     | <a href="#">22033</a><br><a href="#">18047</a><br><a href="#">17093</a><br><a href="#">17062</a>                                                   | 2022-08-16<br>2018-08-21<br>2017-09-08<br>2017-06-13                             | Water Surface Elevation (WSE) and habitat classification in the Peace-Athabasca Delta; overlap with AirSWOT Ka-band acquisitions |
| 32911   | FSmitS     | <a href="#">17093</a><br><a href="#">17062</a>                                                                                                     | 2017-09-08<br>2017-06-13                                                         | Water Surface Elevation (WSE) for the Slave River trans-boundary watershed                                                       |
| 33410   | FSmitN     | <a href="#">22033</a><br><a href="#">19059</a><br><a href="#">17093</a><br><a href="#">17062</a>                                                   | 2022-08-16<br>2019-09-04<br>2017-09-08<br>2017-06-13                             | Water Surface Elevation (WSE) for the Slave River trans-boundary watershed                                                       |
| 05530   | FtResN     | <a href="#">22033</a><br><a href="#">19059</a><br><a href="#">18047</a><br><a href="#">17093</a><br><a href="#">17062</a>                          | 2022-08-16<br>2019-09-04<br>2018-08-21<br>2017-09-08<br>2017-06-13               | Water Surface Elevation (WSE) and habitat classification in the Slave River Delta                                                |
| 23404   | FtResS     | <a href="#">22033</a><br><a href="#">19059</a><br><a href="#">17093</a><br><a href="#">17062</a>                                                   | 2022-08-16<br>2019-09-04<br>2017-09-08<br>2017-06-13                             | Water Surface Elevation (WSE) and habitat classification in the Slave River Delta                                                |

79  
 80  
 81  
 82



83 **3.6 Region C6: Southern Boreal Forest/BERMS**

84 **Figure S17** shows the flight lines for Region C6:  
85 Southern Boreal Forest/BERMS. Details for  
86 individual L-band SAR flight lines are given in  
87 **Table S19**; the P-band acquisition details are  
88 given in **Table S31**.

89  
90 Region C6 covers the southern edge of the boreal  
91 plains ecozone which was intensively studied  
92 during NASA’s BOREAS field campaigns in the  
93 1990s [Sellers et al. 1994; 1997]. Revisits to the  
94 area during ABoVE allow for an assessment of  
95 change over the last 20 years. This region  
96 features the Boreal Ecosystem Research and  
97 Monitoring Sites (**BERMS**) covering flux towers  
98 at Old Jack Pine (**OJP**), Old Black Spruce (**OBS**),  
99 and Old Aspen (**OAS**) vegetation types [Barr  
00 2006]. ‘Old’ refers to the monitoring site being  
01 located within a mature stand of trees. The Old  
02 Aspen site ended operations in 2017 shortly after  
03 the ABoVE flights that year. The BERMS area  
04 has been the target of previous L- and P-band  
05 SAR campaigns. Legacy acquisitions from CanEx 2010 [Magagi et al. 2012] and AirMOSS (2013-  
06 2015) [Tabatabaenejad et al. 2020] provide the opportunity to extend the ABoVE time series and  
07 investigate decadal-scale ecosystem change. ABoVE SAR flight lines also leverage the extensive forest  
08 inventory plots, HELCIA, and CIPHA sites maintained by the Canadian Forestry Service, as well as  
09 legacy LiDAR acquisitions. The region also spatially overlaps with extensive PALS airborne L-band  
10 retrievals acquired during the NASA SMAPVEX-16 campaign [McNairn et al. 2017; Colliander et al.  
11 2019] and tower mounted L-band radiometer acquisitions at the OBS site [Roy et al. 2020]; these data  
12 provide opportunities to investigate L-band active/passive microwave synergy for mapping vegetation  
13 biomass, freeze-thaw, and soil moisture conditions.

14  
15 Since this region lacks permafrost, there was no reason to acquire an early season baseline and all  
16 acquisitions have been acquired near DOY 240 (late-August to early-September). In 2018 L-band  
17 tomoSAR data were acquired over the BERMS grid in conjunction with DLR’s F-SAR multi-frequency  
18 airborne SAR (see Section 6 for additional details).

19  
20 **Line 30704: Redber.** The Redberry Lake flight line starts southeast of Saskatoon and travels ~130 km  
21 northwest and terminates north of Hafford, SK. It is anchored by the Redberry Lake WSE calibration  
22 site [Pietroniro et al. 2019] and is an important line for cross calibration with AirSWOT Ka-band radar  
23 acquisitions [Smith et al. 2017]. It includes Environment & Climate Change Canada monitoring sites;

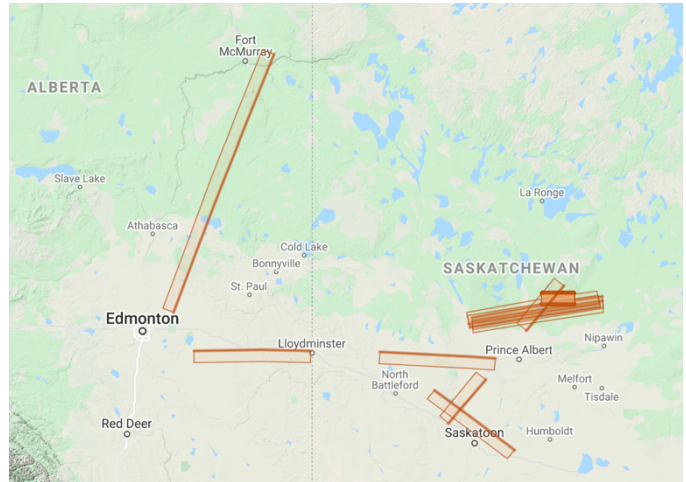

**Figure S17. L-band SAR flight lines in Region C6 sample the southern boreal forest, including the BOREAS-era BERMS sites. Both NASA’s L-band SAR and DLR’s multi-frequency F-SAR flew tomoSAR grids over the BERMS site in 2018. Legacy data from CANEX 2010 (L-band) and the AIRMOSS EV-S investigation (P-band, 2013-2015) provide the opportunity to investigate decadal-scale ecosystem change. © Google Maps**

24 GPS water level surveys of prairie pothole wetlands; and geomorphic changes along the North  
25 Saskatchewan River.

26  
27 **Line 04016: SaskS.** The Saskatoon South flight line begins northeast of Radisson, SK then travels ~70  
28 km northeast over Blaine Lake to end near Leask, SK. It is anchored by several CFS plots and also  
29 captures large agricultural areas. It includes ECCC sites; GPS water level surveys; prairie pothole  
30 wetlands; and geomorphic changes along the North Saskatchewan River.

31  
32 **Line 04018: SaskN.** The Saskatoon North flight line begins ~20 km southwest of Candle Lake, SK,  
33 then travels ~70 km northeast over Candle Lake and the BERMS research area. It is anchored by the  
34 Old Black Spruce (OBS) flux tower and numerous CFS/HELICA plots.

35  
36 **Lines 26107 BERMSA, 26106: BERMSB, 08111: BERMSC, and 08108: BERMSD.** The BERMS  
37 area flight lines BERMSA-D create a 30 km x 175 km grid over the OBS, OJP, FEN, and OAS flux  
38 towers and Candle Lake. These lines overlap substantially with the legacy L-band lines from the  
39 CANEX 2010 campaign [Magagi et al. 2012] and the P-band lines from the AirMOSS EV-S1  
40 investigation (2012-2015) [Chapin et al. 2018].

41  
42 **Line 27037: BERMSR.** The BERMSR (reference) flight line covers an east-west transect of ~55 km  
43 and is anchored by the OBS and OJP flux towers. It is a reference acquisition for the tomoSAR  
44 experiment performed in August 2018 (Flight Plan 18046) in conjunction with the German Space  
45 Agency's multi-frequency F-SAR [Pichierri et al. 2018]. Flight line details are given in **Table S20** and  
46 the results are described in Section 6 of the main text. Line 27037 was reacquired in 2019 to evaluate  
47 interannual variability.

48  
49 **Lines 27304 LloydE and 27304 LloydW.** The two Llyodminster flight lines establish a long east-west  
50 transect across the prairie in an area known to be permafrost free and provide a critical test for water  
51 mask and water surface elevation retrieval algorithms adapted for permafrost ecosystems [L. Smith,  
52 private communication]. The Llyodminster East flight line begins near Sherbrook, SK and travels ~150  
53 km west to Edam, SK. After a gap of ~100 km, data collection was restarted for the Llyodminster West  
54 line and continued for another ~150 km along the same heading.

55  
56 **Line 02111: FtMacM.** The Fort McMurray flight line originates north of Edmonton and travels nearly  
57 400 km north, terminating north of Fort McMurray. It is anchored by multiple clusters of CFS long-  
58 term plots, studies of boreal forest reclamation, and provides a south-north transect through the 2016  
59 Horse River burn scar. Field data on fire severity and pre-fire biomass were sampled at several sites in  
60 the 2016 fire [Bourgeau-Chavez et al. 2017]. This flight line covers the prairie-boreal forest ecotone.

61  
62  
63  
64  
65

**Table S19. Region C6: Southern Boreal Forest/BERMS L-band Flight Line Summary**

| Line ID | Short Name | Flight                                         | Date                     | Comments                                                                                         |
|---------|------------|------------------------------------------------|--------------------------|--------------------------------------------------------------------------------------------------|
| 30704   | Redber     | <a href="#">19057</a><br><a href="#">17092</a> | 2019-08-16<br>2017-09-07 | Calibration for AirSWOT and Water Surface Elevation (WSE) at Redberry Lake                       |
| 04016   | SaskaS     | <a href="#">19057</a><br><a href="#">17092</a> | 2019-08-16<br>2017-09-07 | AirSWOT field sites                                                                              |
| 04018   | SaskaN     | <a href="#">19057</a><br><a href="#">17092</a> | 2019-08-16<br>2017-09-07 | Transect through the BERMS research area, BOREAS Old Black Spruce (OBS) flux tower, HELICA sites |
| 26107   | BERMSA     | <a href="#">17093</a>                          | 2017-09-08               | BERMS area grid; OBS, OJP, FEN, and OAS flux towers                                              |
| 26106   | BERMSB     | <a href="#">17093</a>                          | 2017-09-08               | BERMS area grid; OBS, OJP, FEN, and OAS flux towers                                              |
| 08111   | BERMSC     | <a href="#">17093</a>                          | 2017-09-08               | BERMS area grid; OBS, OJP, FEN, and OAS flux towers                                              |
| 08108   | BERMSD     | <a href="#">17093</a>                          | 2017-09-08               | BERMS area grid; OBS, OJP, FEN, and OAS flux towers                                              |
| 27037   | BERMSR     | <a href="#">19057</a>                          | 2019-08-16               | TomoSAR reference line; interannual variability                                                  |
| 27304   | LloydE     | <a href="#">17092</a>                          | 2017-09-07               | Test for ecohydrology algorithms (permafrost free zone)                                          |
| 27304   | LloydW     | <a href="#">17092</a>                          | 2017-09-07               | Test for ecohydrology algorithms (permafrost free zone)                                          |
| 02111   | FtMacM     | <a href="#">17093</a><br><a href="#">17062</a> | 2017-09-08<br>2017-06-13 | Horse River burn transect; prairie – boreal forest ecotone                                       |

67

68

69

**Table S20. BERMS L-band TomoSAR Flight Lines**

| Line ID | Short Name | Flight Plan                                    | Date                     | Comments              |
|---------|------------|------------------------------------------------|--------------------------|-----------------------|
| 09041   | BERMSA     | <a href="#">22031</a><br><a href="#">18046</a> | 2022-08-14<br>2018-08-19 | TomoSAR 40m Baseline  |
| 26107   | BERMSA     | <a href="#">22031</a><br><a href="#">18046</a> | 2022-08-14<br>2018-08-19 | TomoSAR 40m Baseline  |
| 09043   | BERMSB     | <a href="#">22031</a><br><a href="#">18046</a> | 2022-08-14<br>2018-08-19 | TomoSAR 80m Baseline  |
| 27043   | BERMSB     | <a href="#">22031</a><br><a href="#">18046</a> | 2022-08-14<br>2018-08-19 | TomoSAR 80m Baseline  |
| 09039   | BERMSC     | <a href="#">22031</a><br><a href="#">18046</a> | 2022-08-14<br>2018-08-19 | TomoSAR 120m Baseline |
| 27039   | BERMSC     | <a href="#">22031</a><br><a href="#">18046</a> | 2022-08-14<br>2018-08-19 | TomoSAR 120m Baseline |
| 09044   | BERMSD     | <a href="#">22031</a><br><a href="#">18046</a> | 2022-08-14<br>2018-08-19 | TomoSAR 160m Baseline |
| 27044   | BERMSD     | <a href="#">22031</a><br><a href="#">18046</a> | 2022-08-14<br>2018-08-19 | TomoSAR 160m Baseline |
| 09040   | BERMSE     | <a href="#">22031</a>                          | 2022-08-14               | TomoSAR 200m Baseline |

|       |        |                                                |                          |                        |
|-------|--------|------------------------------------------------|--------------------------|------------------------|
|       |        | <a href="#">18046</a>                          | 2018-08-19               |                        |
| 27040 | BERMSE | <a href="#">22031</a><br><a href="#">18046</a> | 2022-08-14<br>2018-08-19 | TomoSAR 200m Baseline  |
| 09042 | BERMSF | <a href="#">22031</a><br><a href="#">18046</a> | 2022-08-14<br>2018-08-19 | TomoSAR 240m Baseline  |
| 27042 | BERMSF | <a href="#">22031</a><br><a href="#">18046</a> | 2022-08-14<br>2018-08-19 | TomoSAR 240m Baseline  |
| 09038 | BERMSG | <a href="#">22031</a><br><a href="#">18046</a> | 2022-08-14<br>2018-08-19 | TomoSAR 280m Baseline  |
| 27038 | BERMSG | <a href="#">22031</a><br><a href="#">18046</a> | 2022-08-14<br>2018-08-19 | TomoSAR 280m Baseline  |
| 09037 | BERMSR | <a href="#">22031</a><br><a href="#">18046</a> | 2022-08-14<br>2018-08-19 | TomoSAR Reference Line |
| 27037 | BERMSR | <a href="#">22031</a><br><a href="#">18046</a> | 2022-08-14<br>2018-08-19 | TomoSAR Reference Line |
| TM090 | BERMSR | <a href="#">18046</a>                          | 2018-08-19               | TomoSAR 280m Baseline  |
| TM270 | BERMSR | <a href="#">18046</a>                          | 2018-08-19               | TomoSAR 80m Baseline   |

70  
71  
72  
73  
74

75 **4 ABoVE P-band Flight Lines**

76 The ABoVE P-band SAR data were acquired during campaigns in May/June, August, and October of  
 77 2017 (**Tables S6-S8**). **Tables S21-S31** provide the details for individual flight lines for the Alaskan and  
 78 Canadian Sectors.

79

80

81

**Table S21. Region A1 (North Slope Alaska) P-band Flight Line Summary**

| <b>P-band Line ID</b> | <b>Short Name</b> | <b>Flight Plan</b>                                                      | <b>Date</b>                            | <b>Comments</b>                                                                                                                                                               |
|-----------------------|-------------------|-------------------------------------------------------------------------|----------------------------------------|-------------------------------------------------------------------------------------------------------------------------------------------------------------------------------|
| 03107                 | Ivotuk            | <a href="#">17109</a><br><a href="#">17079</a><br><a href="#">17056</a> | 2017-10-09<br>2017-08-13<br>2017-05-29 | Legacy line; Ivotuk flux tower, CALM site, GTN-P boreholes<br>Matches L-band line 03111                                                                                       |
| 34505                 | Atqasu            | <a href="#">17109</a><br><a href="#">17079</a><br><a href="#">17058</a> | 2017-10-09<br>2017-08-13<br>2017-06-06 | Legacy line; Atqasuk flux tower; CALM site<br>Matches L-band line 34509                                                                                                       |
| 15010                 | Barrow            | <a href="#">17109</a><br><a href="#">17079</a><br><a href="#">17058</a> | 2017-10-09<br>2017-08-13<br>2017-06-06 | Legacy line; NGEE-Artic, NEON, BEO flux towers, CALM sites<br>Matches L-band line 15018                                                                                       |
| 04600                 | Inigok            | <a href="#">17079</a><br><a href="#">17058</a>                          | 2017-08-13<br>2017-06-06               | North Slope CALM sites, boreholes<br>Matches L-band line 04603                                                                                                                |
| 33410                 | AnaktE            | <a href="#">17079</a><br><a href="#">17058</a>                          | 2017-08-13<br>2017-06-06               | Anaktuvuk River fire scar, eastern transect<br>Matches L-band line 33408                                                                                                      |
| 16404                 | AnaktW            | <a href="#">17079</a><br><a href="#">17058</a>                          | 2017-08-13<br>2017-06-06               | Anaktuvuk River fire scar, western transect<br>Matches L-band line 16405                                                                                                      |
| 18517                 | Dhorse            | <a href="#">17109</a><br><a href="#">17079</a><br><a href="#">17058</a> | 2017-10-09<br>2017-08-13<br>2017-06-06 | North-South transect running from the Arctic Ocean coast through Deadhorse and south along the Dalton Highway; covers numerous calibration sites<br>Matches L-band line 18519 |
| 05406                 | Toolik            | <a href="#">17109</a><br><a href="#">17079</a><br><a href="#">17056</a> | 2017-10-09<br>2017-08-13<br>2017-05-29 | Toolik Lake Research Station, Arctic LTER, NEON box<br>Matches L-band line 04300                                                                                              |
| 28608                 | Noatak            | <a href="#">17079</a><br><a href="#">17056</a>                          | 2017-08-13<br>2017-05-29               | Fire disturbance/recovery                                                                                                                                                     |

82

83

84

85

86

87 **Table S22. Region A2 (Seward Peninsula and Northwestern Interior P-band Flight Line Summary**

| Line ID | Short Name | Flight                                                                  | Date                                   | Comments                                                                                                                       |
|---------|------------|-------------------------------------------------------------------------|----------------------------------------|--------------------------------------------------------------------------------------------------------------------------------|
| 25507   | Huslia     | <a href="#">17109</a><br><a href="#">17082</a><br><a href="#">17055</a> | 2017-10-09<br>2017-08-17<br>2017-05-27 | Interior Alaska, Huslia village<br>Matches L-band line 25516                                                                   |
| 25508   | Koyukk     | <a href="#">17110</a><br><a href="#">17082</a><br><a href="#">17055</a> | 2017-10-10<br>2017-08-17<br>2017-05-27 | AirMOSS legacy line; Koyuk village, boreal forest, coastal mountains<br>Matches L-band line 25517                              |
| 32510   | Counci     | <a href="#">17110</a><br><a href="#">17082</a><br><a href="#">17056</a> | 2017-10-10<br>2017-08-17<br>2017-05-29 | Legacy line; NGEE-Artic Council watershed and flux tower, Kougarok watershed<br>Matches L-band line 32519                      |
| 04900   | Teller     | <a href="#">17110</a><br><a href="#">17082</a><br><a href="#">17056</a> | 2017-10-10<br>2017-08-17<br>2017-05-29 | NGEE-Arctic Teller watershed, Kougarok watershed, Kougarok area fire disturbance/recovery<br>Matches L-band lines 04806, 04901 |
| 08509   | Kougar     | <a href="#">17110</a><br><a href="#">17082</a><br><a href="#">17056</a> | 2017-10-10<br>2017-08-17<br>2017-05-29 | AirMOSS legacy line; Seward Peninsula CALM sites, boreholes<br>Matches L-band line 08502                                       |
| 03106   | Ambler     | <a href="#">17109</a><br><a href="#">17082</a><br><a href="#">17055</a> | 2017-10-09<br>2017-08-17<br>2017-05-27 | AirMOSS legacy line; boreholes, boreal forest-foothills gradient<br>Matches L-band line 03101                                  |
| 28608   | Noatak     | <a href="#">17079</a><br><a href="#">17056</a>                          | 2017-08-13<br>2017-05-29               | Fire disturbance/recovery<br>Matches L-band line 28508                                                                         |

88  
89  
90

**Table S23. Region A3: Eastern Interior P-band Flight Line Summary**

| Line ID | Short Name | Flight Plan                                                                                      | Date                                                 | Comments                                                                           |
|---------|------------|--------------------------------------------------------------------------------------------------|------------------------------------------------------|------------------------------------------------------------------------------------|
| 20007   | Coldfo     | <a href="#">17109</a><br><a href="#">17082</a><br><a href="#">17079</a><br><a href="#">17055</a> | 2017-10-09<br>2017-08-17<br>2017-08-13<br>2017-05-27 | CALM and GTN-P sites; tundra-taiga ecotone<br>Matches L-band line 20026            |
| 21507   | YflatW     | <a href="#">17082</a><br><a href="#">17056</a>                                                   | 2017-08-17<br>2017-05-29                             | Overlap with AEM surveys, AirSWOT and in situ water surface elevation measurements |
| 21608   | YflatE     | <a href="#">17082</a><br><a href="#">17056</a>                                                   | 2017-08-17<br>2017-05-29                             | Overlap with AEM surveys, AirSWOT and in situ water surface elevation measurements |
| 04707   | FtYuko     | <a href="#">17082</a><br><a href="#">17056</a>                                                   | 2017-08-17<br>2017-05-29                             | Overlap with AEM surveys, AirSWOT and in situ water surface elevation measurements |
| 00100   | DJNEON     | 17078                                                                                            | 2017-08-11                                           | NEON D19 taiga field site near Delta Junction, AK                                  |
| 30406   | DeltJA     | 17078                                                                                            | 2017-08-11                                           | Delta Junction, AK boreal forest                                                   |

|       |        |       |            |                                  |
|-------|--------|-------|------------|----------------------------------|
| 10203 | DeltJB | 17078 | 2017-08-11 | Delta Junction, AK boreal forest |
| 30203 | DeltJC | 17078 | 2017-08-11 | Delta Junction, AK boreal forest |

91  
92  
93  
94  
95  
96  
97  
98

\*\*\* Interior Alaska P-band lines forbidden due to radar keep out zone at Clear AK – See Fig 4 in Main Text. Therefore, there are no P-band lines corresponding to the BonanW, BonanE, DenalN, DenalS L-band lines \*\*\*\*

**Table S24. Delta Junction, AK P-band tomoSAR Flight Line Summary**

| Line ID | Short Name | Flight Plan           | Date       | Comments                                 |
|---------|------------|-----------------------|------------|------------------------------------------|
| 12216   | DeltaR     | <a href="#">17081</a> | 2017-08-15 | TomoSAR Reference Line 9000 mASL         |
| 30210   | DeltaR     | <a href="#">17081</a> | 2017-08-15 | TomoSAR Reference Line 9000 mASL         |
| 12217   | DeltaA     | <a href="#">17081</a> | 2017-08-15 | TomoSAR offset 120 meters                |
| 30211   | DeltaA     | <a href="#">17081</a> | 2017-08-15 | TomoSAR offset 120 meters                |
| 12218   | DeltaB     | <a href="#">17081</a> | 2017-08-15 | TomoSAR offset 135 meters                |
| 30212   | DeltaB     | <a href="#">17081</a> | 2017-08-15 | TomoSAR offset 135 meters                |
| 12219   | DeltaC     | <a href="#">17081</a> | 2017-08-15 | TomoSAR offset 105 meters                |
| 30213   | DeltaC     | <a href="#">17081</a> | 2017-08-15 | TomoSAR offset 105 meters                |
| 12220   | DeltaD     | <a href="#">17081</a> | 2017-08-15 | TomoSAR offset 150 meters                |
| 30214   | DeltaD     | <a href="#">17081</a> | 2017-08-15 | TomoSAR offset 150 meters                |
| 12221   | DeltaE     | <a href="#">17081</a> | 2017-08-15 | TomoSAR offset 75 meters                 |
| 30215   | DeltaE     | <a href="#">17081</a> | 2017-08-15 | TomoSAR offset 75 meters                 |
| 12222   | DeltaF     | <a href="#">17081</a> | 2017-08-15 | TomoSAR offset 175 meters                |
| 30216   | DeltaF     | <a href="#">17081</a> | 2017-08-15 | TomoSAR offset 175 meters                |
| 12223   | DeltaG     | <a href="#">17081</a> | 2017-08-15 | TomoSAR offset 250 meters                |
| 30217   | DeltaG     | <a href="#">17081</a> | 2017-08-15 | TomoSAR offset 250 meters                |
| 12224   | DeltaH     | <a href="#">17081</a> | 2017-08-15 | TomoSAR offset 90 meters                 |
| 30218   | DeltaH     | <a href="#">17081</a> | 2017-08-15 | TomoSAR offset 90 meters                 |
| 12216   | DeltaR     | <a href="#">17081</a> | 2017-08-15 | TomoSAR Reference Line 9000 mASL, Take 2 |
| 30210   | DeltaR     | <a href="#">17081</a> | 2017-08-15 | TomoSAR Reference Line 9000 mASL. Take 2 |

99  
00

01  
02  
03

**Table S25. Region A4: Southwest Alaska and the Yukon-Kuskokwim Delta P-band Flight Line Summary**

| <b>Line ID</b> | <b>Short Name</b> | <b>Flight Plan</b>                             | <b>Date</b>              | <b>Comments</b>                                                                                                                            |
|----------------|-------------------|------------------------------------------------|--------------------------|--------------------------------------------------------------------------------------------------------------------------------------------|
| 19204          | Lclark            | <a href="#">17080</a><br><a href="#">17054</a> | 2017-08-14<br>2017-05-26 | National Park Service SWAN ground sites<br>Matches L-band line 19205                                                                       |
| 23002          | KatmaA            | <a href="#">17080</a><br><a href="#">17054</a> | 2017-08-14<br>2017-05-26 | National Park Service SWAN ground sites<br>Matches L-band line 23004                                                                       |
| 28019          | KatmaB            | <a href="#">17080</a><br><a href="#">17054</a> | 2017-08-14<br>2017-05-26 | National Park Service SWAN ground sites<br>Matches L-band line 28020                                                                       |
| 02110          | KatmaC            | <a href="#">17080</a><br><a href="#">17054</a> | 2017-08-14<br>2017-05-26 | National Park Service SWAN ground sites<br>Matches L-band line 02112                                                                       |
| 32607          | Sriver            | <a href="#">17080</a><br><a href="#">17054</a> | 2017-08-14<br>2017-05-26 | Snake River tree rings sampling<br>Matches L-band line 32608                                                                               |
| 27030          | YKDelA            | <a href="#">17080</a><br><a href="#">17055</a> | 2017-08-14<br>2017-05-27 | YK Delta 2015 fire scars; POLARIS portable flux towers/flux chambers; GPR transects; soil moisture measurements; Matches L-band line 26905 |
| 27031          | YKDelB            | <a href="#">17080</a><br><a href="#">17055</a> | 2017-08-14<br>2017-05-27 | YK Delta 2015 fire scars; POLARIS portable flux towers/flux chambers; GPR transects; soil moisture measurements; Matches L-band line 26906 |
| 01811          | Chevak            | <a href="#">17080</a><br><a href="#">17055</a> | 2017-08-14<br>2017-05-27 | YK Delta wildlife survey; USGS LiDAR survey; ground measurements; Matches L-band line 01813                                                |
| 04214          | Innoko            | <a href="#">17080</a><br><a href="#">17055</a> | 2017-08-14<br>2017-05-27 | Permafrost surveys; extensive bog/fen/wetland complex<br>Matches L-band line 04215                                                         |
| 08919          | Poorma            | <a href="#">17080</a><br><a href="#">17054</a> | 2017-08-14<br>2017-05-26 | Interior Alaska, boreal forest<br>Matches L-band line 08911                                                                                |

04  
05  
06



07  
08  
09

**Table S26. Region C1: Lower Mackenzie Valley and Northern Yukon Territory P-band Flight Line Summary**

| <b>Line ID</b> | <b>Short Name</b> | <b>Flight Plan</b>                             | <b>Date</b>              | <b>Comments</b>                                                                                               |
|----------------|-------------------|------------------------------------------------|--------------------------|---------------------------------------------------------------------------------------------------------------|
| 30013          | Nwells            | <a href="#">17083</a><br><a href="#">17057</a> | 2017-08-18<br>2017-06-06 | CALM and GTN-P borehole sites; oil exploration and production near Norman Wells;<br>Matches L-band line 29904 |
| 32203          | GdHope            | <a href="#">17083</a>                          | 2017-08-18               | Boreal forest and fire disturbance; wetlands and water surface elevation (WSE)<br>Matches L-band line 32200   |
| 31616          | GdHope            | <a href="#">17057</a>                          | 2017-06-06               | Boreal forest and fire disturbance; wetlands and water surface elevation (WSE)<br>Matches L-band line 32200   |
| 25701          | Aklavi            | <a href="#">17083</a><br><a href="#">17057</a> | 2017-08-18<br>2017-06-06 | Legacy LiDAR and RadarSat data; Makenzie Delta WSE<br>Matches L-band line 25702                               |
| 05604          | McPher            | <a href="#">17083</a><br><a href="#">17057</a> | 2017-08-18<br>2017-06-06 | Legacy LiDAR data; retrogressive thaw megaslumps<br>Matches L-band line 05529                                 |
| 01812          | TukHwy            | <a href="#">17083</a><br><a href="#">17057</a> | 2017-08-18<br>2017-06-06 | Legacy LiDAR and RadarSat data; Trail Valley Creek site; ShrubTundra sites; Matches L-band line 01703         |
| 20605          | OldCrA            | <a href="#">17083</a><br><a href="#">17057</a> | 2017-08-18<br>2017-06-06 | Long-term monitoring of thermokarst-driven lake change<br>Matches L-band line 20705                           |
| 24400          | OldCrB            | <a href="#">17083</a><br><a href="#">17057</a> | 2017-08-18<br>2017-06-06 | Old Crow; Porcupine River<br>Matches L-band line 24401                                                        |

10  
11  
12  
13  
14

15 **Table S27. Region C2: Southern Yukon Territory P-band Flight Line Summary**

| Line ID | Short Name | Flight Plan                                    | Date                     | Comments                                                                                              |
|---------|------------|------------------------------------------------|--------------------------|-------------------------------------------------------------------------------------------------------|
| 27509   | Watson     | <a href="#">17078</a><br><a href="#">17053</a> | 2017-08-11<br>2017-05-25 | Watson Lake YT research nexus; YGS Permafrost Monitoring Network; Matches L-band line 27510           |
| 23601   | WolfCr     | <a href="#">17078</a><br><a href="#">17053</a> | 2017-08-11<br>2017-05-25 | Wolf Creek Research Basin; YGS Permafrost Monitoring Network; Matches L-band line 23602               |
| 30805   | KluanA     | <a href="#">17078</a>                          | 2017-08-11               | Kluane Lake Research Station; legacy Hyperion data<br>Matches L-band line 30806                       |
| 01901   | KluanB     | <a href="#">17078</a><br><a href="#">17053</a> | 2017-08-11<br>2017-05-25 | Kluane Lake Research Station; legacy Hyperion data<br>Matches L-band line 01902                       |
| 31030   | SnagYK     | <a href="#">17078</a><br><a href="#">17053</a> | 2017-08-11<br>2017-05-25 | Snag YT and Alaska/Canada border region; YGS Permafrost Monitoring Network; Matches L-band line 31040 |

16  
17  
18  
19  
20

**Table S28. Region C3: Upper Mackenzie Valley P-band Flight Line Summary**

| Line ID | Short Name | Flight                                         | Date                     | Comments                                                                                       |
|---------|------------|------------------------------------------------|--------------------------|------------------------------------------------------------------------------------------------|
| 33020   | Fliard     | <a href="#">17077</a><br><a href="#">17053</a> | 2017-08-09<br>2017-05-25 | Fort Liard NT; HELCIA plots; highly productive boreal forest; Matches L-band line 33021        |
| 16712   | Scotty     | <a href="#">17077</a><br><a href="#">17052</a> | 2017-08-09<br>2017-05-23 | Scotty Creek Research Watershed; permafrost monitoring; flux towers; Matches L-band line 16713 |
| 20025   | ScoAOI     | <a href="#">17077</a><br><a href="#">17053</a> | 2017-08-09<br>2017-05-25 | Scotty Creek Intensive Observation sites near Trout Lake<br>Matches L-band line 20027          |
| 17401   | WriglS     | <a href="#">17077</a><br><a href="#">17052</a> | 2017-08-09<br>2017-05-23 | Fort Simpson NT area; HELCIA and CALM site<br>Matches L-band line 17402                        |
| 15405   | WriglN     | <a href="#">17077</a><br><a href="#">17052</a> | 2017-08-09<br>2017-05-23 | Wrigley NT area; Smith Creek flux tower; CALM site<br>Matches L-band line 15406                |

21  
22  
23

24 **Table S29. Region C4: Great Slave Lake Region P-band Flight Line Summary**

| Line ID | Short Name | Flight Plan                                    | Sortie Date              | Comments                                                                                                |
|---------|------------|------------------------------------------------|--------------------------|---------------------------------------------------------------------------------------------------------|
| 11702   | KakisaA    | <a href="#">17077</a><br><a href="#">17052</a> | 2017-08-09<br>2017-05-23 | Burn study sites near Kakisa Lake<br>Matches L-band line 11703                                          |
| 34808   | KakisaB    | <a href="#">17077</a><br><a href="#">17053</a> | 2017-08-09<br>2017-05-25 | Burn study sites near Kakisa Lake<br>Matches L-band line 34809                                          |
| 04005   | Provid     | <a href="#">17077</a><br><a href="#">17052</a> | 2017-08-09<br>2017-05-23 | Burn study sites accessible from Highway NT 3 near Fort Providence; Matches L-band line 04006           |
| 35301   | Behcho     | <a href="#">17076</a><br><a href="#">17052</a> | 2017-08-08<br>2017-05-23 | Burn study sites accessible from Highway NT 3 near Behchoko; Matches L-band line 35302                  |
| 33101   | SnareR     | <a href="#">17077</a><br><a href="#">17052</a> | 2017-08-09<br>2017-05-23 | Snare River hydrology and water surface elevation<br>Matches L-band line 33102                          |
| 04601   | FaberL     | <a href="#">17077</a><br><a href="#">17052</a> | 2017-08-09<br>2017-05-23 | Faber Lake burn study sites<br>Matches L-band line 04605                                                |
| 21404   | Daring     | <a href="#">17078</a><br><a href="#">17052</a> | 2017-08-11<br>2017-05-23 | Taiga-tundra transition from Yellowknife to the Daring Lake Research Station; Matches L-band line 21405 |
| 22800   | Yellow     | <a href="#">17076</a><br><a href="#">17052</a> | 2017-08-08<br>2017-05-23 | Burn study sites southeast of Yellowknife<br>Matches L-band line 22801                                  |

25  
26 **Table S30. Region C5: Peace-Athabasca Delta and Trans-Boundary Watershed P-band Flight Line**  
27 **Summary**

| Line ID | Short Name | Flight                                         | Date                     | Comments                                                                                                                                                    |
|---------|------------|------------------------------------------------|--------------------------|-------------------------------------------------------------------------------------------------------------------------------------------------------------|
| 00026   | PADelE     | <a href="#">17076</a><br><a href="#">17051</a> | 2017-08-08<br>2017-05-22 | Water Surface Elevation (WSE) and habitat classification in the Peace-Athabasca Delta; overlap with AirSWOT Ka-band acquisitions; Matches L-band line 36000 |
| 18034   | PADelW     | <a href="#">17076</a><br><a href="#">17051</a> | 2017-08-08<br>2017-05-22 | Water Surface Elevation (WSE) and habitat classification in the Peace-Athabasca Delta; overlap with AirSWOT Ka-band acquisitions; Matches L-band line 18035 |
| 32910   | FSmitS     | <a href="#">17076</a><br><a href="#">17051</a> | 2017-08-08<br>2017-05-22 | Water Surface Elevation (WSE) for the Slave River trans-boundary watershed; Matches L-band line 32911                                                       |
| 33409   | FSmitN     | <a href="#">17076</a><br><a href="#">17053</a> | 2017-08-08<br>2017-05-25 | Water Surface Elevation (WSE) for the Slave River trans-boundary watershed; Matches L-band line 33410                                                       |
| 05528   | FtResN     | <a href="#">17076</a><br><a href="#">17053</a> | 2017-08-08<br>2017-05-25 | Water Surface Elevation (WSE) and habitat classification in the Slave River Delta; Matches L-band line 05530                                                |
| 23403   | FtResS     | <a href="#">17076</a><br><a href="#">17053</a> | 2017-08-08<br>2017-05-25 | Water Surface Elevation (WSE) and habitat classification in the Slave River Delta; Matches L-band line 23404                                                |

30 **Table S31. Region C6: Southern Boreal Forest/BERMS P-band Flight Line Summary**

| <b>Line ID</b> | <b>Short Name</b> | <b>Flight</b>                                  | <b>Date</b>              | <b>Comments</b>                                                                                                               |
|----------------|-------------------|------------------------------------------------|--------------------------|-------------------------------------------------------------------------------------------------------------------------------|
| 30703          | Redber            | <a href="#">17075</a>                          | 2017-08-07               | Calibration for AirSWOT and Water Surface Elevation (WSE) at Redberry Lake; Matches L-band line 30704                         |
| 04011          | SaskaS            | <a href="#">17075</a>                          | 2017-08-07               | AirSWOT field sites<br>Matches L-band line 04016                                                                              |
| 04015          | SaskaN            | <a href="#">17075</a>                          | 2017-08-07               | Transect through the BERMS research area, BOREAS Old Black Spruce (OBS) flux tower, HELICA sites<br>Matches L-band line 04018 |
| 26105          | BERMSA            | <a href="#">17075</a>                          | 2017-08-07               | BERMS area grid; OBS, OJP, FEN, and OAS flux towers<br>Matches L-band line 26107                                              |
| 26104          | BERMSB            | <a href="#">17075</a>                          | 2017-08-07               | BERMS area grid; OBS, OJP, FEN, and OAS flux towers<br>Matches L-band line 26106                                              |
| 08107          | BERMSC            | <a href="#">17075</a>                          | 2017-08-07               | BERMS area grid; OBS, OJP, FEN, and OAS flux towers<br>Matches L-band line 08111                                              |
| 08106          | BERMSD            | <a href="#">17075</a>                          | 2017-08-07               | BERMS area grid; OBS, OJP, FEN, and OAS flux towers<br>Matches L-band line 08108                                              |
| 27303          | LloydE            | <a href="#">17075</a>                          | 2017-08-07               | Test for ecohydrology algorithms (permafrost free zone)<br>Matches L-band line 27304                                          |
| 27303          | LloydW            | <a href="#">17075</a>                          | 2017-08-07               | Test for ecohydrology algorithms (permafrost free zone)<br>Matches L-band line 27304                                          |
| 02109          | FtMacM            | <a href="#">17076</a><br><a href="#">17051</a> | 2017-08-08<br>2017-05-22 | Horse River burn transect; prairie – boreal forest ecotone<br>Matches L-band line 02111                                       |

31  
32 \*\*\* No permafrost in this region, so early season lines not acquired, except for FtMacM, which exists in  
33 an area of sporadic permafrost \*\*\*  
34

35 **5 Legacy Flight Lines**

36 Numerous legacy flight lines for both L- and P-band SAR were available prior to the ABoVE Airborne  
 37 Campaigns. Most notably, the SMAP CANEX 2010 validation experiment acquired an intensive L-  
 38 band time series over the BERMS site in northern Saskatchewan during June 2017. These lines were  
 39 revisited with P-band acquisitions during the AIRMOSS EV-S1 investigation (2012-2015).  
 40 Additionally, the AIRMOSS team executed 1 L-band and 4 P-band campaigns in Alaska during the  
 41 2014-15 period.

42  
 43  
 44

**Table S32. Legacy L-band SAR Flight Plans**

| <b>Flight Plan</b>    | <b>Date</b> | <b>Regions Sampled (hyperlink to flight line map)</b>                    |
|-----------------------|-------------|--------------------------------------------------------------------------|
| <a href="#">15147</a> | 2015-10-05  | <a href="#">Seward Peninsula, NW Alaska, &amp; North Slope</a>           |
| <a href="#">10051</a> | 2010-06-17  | <a href="#">BERMS-C flight line</a> ; SMAP CanEx 2010 Campaign           |
| <a href="#">10050</a> | 2010-06-16  | <a href="#">BERMS boreal forest grid</a> ; SMAP CanEx 2010 Campaign      |
| <a href="#">10049</a> | 2010-06-15  | <a href="#">Kenaston SK Daily Time Series</a> ; SMAP CanEx 2010 Campaign |
| <a href="#">10048</a> | 2010-06-14  | <a href="#">Kenaston SK Daily Time Series</a> ; SMAP CanEx 2010 Campaign |
| <a href="#">10047</a> | 2010-06-13  | <a href="#">Kenaston SK Daily Time Series</a> ; SMAP CanEx 2010 Campaign |
| <a href="#">10046</a> | 2010-06-09  | <a href="#">Kenaston SK Daily Time Series</a> ; SMAP CanEx 2010 Campaign |
| <a href="#">10045</a> | 2010-06-06  | <a href="#">Kenaston SK Daily Time Series</a> ; SMAP CanEx 2010 Campaign |
| <a href="#">10044</a> | 2010-06-05  | <a href="#">Kenaston SK Daily Time Series</a> ; SMAP CanEx 2010 Campaign |
| <a href="#">10043</a> | 2010-06-02  | <a href="#">Kenaston SK Daily Time Series</a> ; SMAP CanEx 2010 Campaign |

45  
 46  
 47  
 48  
 49  
 50  
 51  
 52  
 53  
 54

55 **Table S33. Legacy P-band SAR Flight Plans**

| <b>Flight Plan</b>         | <b>Date</b> | <b>Regions Sampled (hyperlink to flight line map)</b>          |
|----------------------------|-------------|----------------------------------------------------------------|
| <a href="#">PLAN 15142</a> | 2015-10-01  | <a href="#">Seward Peninsula, NW Alaska, &amp; North Slope</a> |
| <a href="#">PLAN 15124</a> | 2015-08-29  | <a href="#">Seward Peninsula, NW Alaska, &amp; North Slope</a> |
| <a href="#">PLAN 15039</a> | 2015-04-08  | <a href="#">Seward Peninsula, NW Alaska, &amp; North Slope</a> |
| <a href="#">PLAN 14144</a> | 2014-10-09  | <a href="#">Seward Peninsula, NW Alaska, &amp; North Slope</a> |
| <a href="#">PLAN 14117</a> | 2014-08-16  | <a href="#">North Slope</a>                                    |
| <a href="#">PLAN 14116</a> | 2014-08-16  | <a href="#">Seward Peninsula, NW Alaska, &amp; North Slope</a> |
| <a href="#">PLAN 15139</a> | 2015-09-28  | <a href="#">BERMSA-D</a>                                       |
| <a href="#">PLAN 15137</a> | 2015-09-25  | <a href="#">BERMSA-D</a>                                       |
| <a href="#">PLAN 15135</a> | 2015-09-22  | <a href="#">BERMSA-D</a>                                       |
| <a href="#">PLAN 15121</a> | 2015-08-26  | <a href="#">BERMSA-D</a>                                       |
| <a href="#">PLAN 15119</a> | 2015-08-23  | <a href="#">BERMSA-D</a>                                       |
| <a href="#">PLAN 15117</a> | 2015-08-19  | <a href="#">BERMSA-D</a>                                       |
| <a href="#">PLAN 15102</a> | 2015-07-05  | <a href="#">BERMS &amp; SAFIRE, Northern Saskatchewan</a>      |
| <a href="#">PLAN 15101</a> | 2015-07-02  | <a href="#">BERMSA-D</a>                                       |
| <a href="#">PLAN 15101</a> | 2015-07-02  | <a href="#">BERMSA-D</a>                                       |
| <a href="#">PLAN 15099</a> | 2015-06-29  | <a href="#">BERMSA-D</a>                                       |
| <a href="#">PLAN 14141</a> | 2014-10-07  | <a href="#">BERMSA-D</a>                                       |
| <a href="#">PLAN 14138</a> | 2014-10-04  | <a href="#">BERMSA-D</a>                                       |
| <a href="#">PLAN 14136</a> | 2014-10-01  | <a href="#">BERMSA-D</a>                                       |
| <a href="#">PLAN 14114</a> | 2014-08-15  | <a href="#">BERMSA-D</a>                                       |
| <a href="#">PLAN 14111</a> | 2014-08-12  | <a href="#">BERMSA-D</a>                                       |
| <a href="#">PLAN 14084</a> | 2014-06-14  | <a href="#">BERMSA-D</a>                                       |
| <a href="#">PLAN 14080</a> | 2014-06-11  | <a href="#">BERMSA-D</a>                                       |
| <a href="#">PLAN 14078</a> | 2014-06-08  | <a href="#">BERMSA-D</a>                                       |
| <a href="#">PLAN 13141</a> | 2013-08-02  | <a href="#">BERMSA-D</a>                                       |
| <a href="#">PLAN 13139</a> | 2013-07-29  | <a href="#">BERMSA-D</a>                                       |
| <a href="#">PLAN 13137</a> | 2013-07-27  | <a href="#">BERMSA-D</a>                                       |
| <a href="#">PLAN 13084</a> | 2013-05-01  | <a href="#">BERMSA-D</a>                                       |
| <a href="#">PLAN 13078</a> | 2013-04-26  | <a href="#">BERMSA-D</a>                                       |
| <a href="#">PLAN 13070</a> | 2013-04-22  | <a href="#">BERMSA-D</a>                                       |
| <a href="#">PLAN 12101</a> | 2012-10-11  | <a href="#">BERMSA-D</a>                                       |
| <a href="#">PLAN 12095</a> | 2012-10-07  | <a href="#">BERMSA-D</a>                                       |
| <a href="#">PLAN 12090</a> | 2012-10-04  | <a href="#">BERMSA-D</a>                                       |

56  
57  
58  
59

## 60 5.1 Alaska SAR Legacy Flight Lines

61 The Alaska P-band SAR legacy data (**Figure S19**) are available via the ORNL DAAC [Lou et al. 2019;  
62 <https://doi.org/10.3334/ORNLDAAC/1678>]. This data set provides level 1 (L1) polarimetric radar  
63 backscattering coefficient ( $\sigma_0$ ), multi-look complex, polarimetrically calibrated, and georeferenced  
64 data products from the Airborne Microwave Observatory of Subcanopy and Subsurface (AirMOSS)  
65 radar instrument collected over 10 study sites across Northern Alaska, USA. Flight campaigns took  
66 place in August 2014, October 2014, April 2015, August 2015, September 2015, and October 2015  
67 (**Table S34**). The L1 P-band radar backscatter data can be used to derive estimates of soil water content  
68 and permafrost state. P-band flights over the North Slope during the early cold season (~DOY 280)  
69 have the promise of retrieving zero curtain layer and increasing understanding of non-growing season  
70 CO<sub>2</sub> and CH<sub>4</sub> fluxes [Zona et al. 2016; Natali et al. 2021]

71  
72 Corresponding L-band legacy data were acquired during a single sortie on 5 October 2015 (**Figure S18**,  
73 **Table S35**).  
74

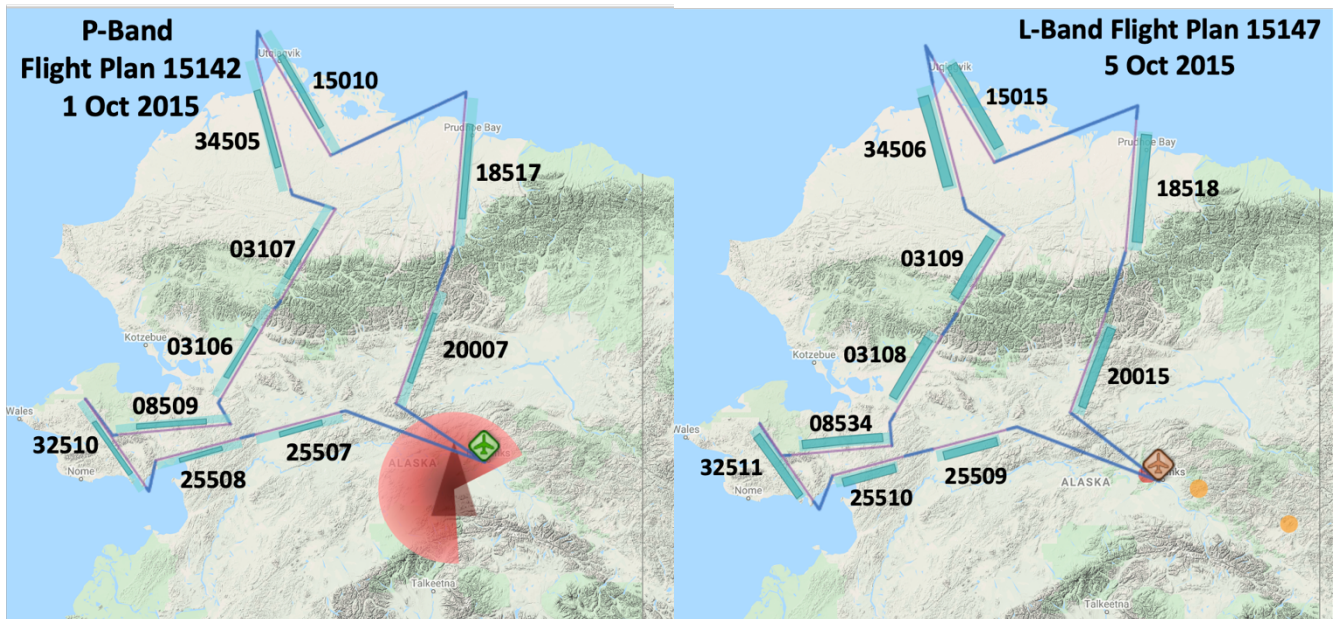

75  
76  
77  
78  
Figure S19. Alaska P-band SAR legacy lines from flight plan 15142 flown on 1 October 2015. Line IDs are given next to the lines. The large red areas in the Interior show P-band radar keep-out zones associated with the military radar at Clear, AK. © Google Maps

Figure S18. Alaska L-band legacy Flight Plan 15147 flown on 5 October, 2015. Flight line IDs are given next to each line. See Figure S19 for the corresponding P-band legacy flight lines. © Google Maps

79 **Table S34. Alaska Legacy P-band SAR Data**

| <b>Line ID</b> | <b>Short Name</b> | <b>Flight Plan</b>                                                                                                        | <b>Date</b>                                                        | <b>Comments</b>                                         |
|----------------|-------------------|---------------------------------------------------------------------------------------------------------------------------|--------------------------------------------------------------------|---------------------------------------------------------|
| 25507          | huslia            | <a href="#">15142</a><br><a href="#">15124</a><br><a href="#">15039</a><br><a href="#">14144</a><br><a href="#">14117</a> | 2015-10-05<br>2015-08-29<br>2015-04-08<br>2014-10-09<br>2014-08-16 | Legacy P-band line;<br>Matches L-band legacy line 25509 |
| 27059          | permaf            | <a href="#">14116</a>                                                                                                     | 2014-08-16                                                         | Legacy P-band line;<br>Matches L-band legacy line 25509 |
| 25508          | koyukk            | <a href="#">15142</a><br><a href="#">15124</a><br><a href="#">15039</a><br><a href="#">14144</a><br><a href="#">14117</a> | 2015-10-05<br>2015-08-29<br>2015-04-08<br>2014-10-09<br>2014-08-16 | Legacy P-band line;<br>Matches L-band legacy line 25510 |
| 25504          | permaf            | <a href="#">14116</a>                                                                                                     | 2014-08-16                                                         | Legacy P-band line;<br>Matches L-band legacy line 25510 |
| 32510          | counci            | <a href="#">15142</a><br><a href="#">15124</a><br><a href="#">15039</a><br><a href="#">14144</a><br><a href="#">14117</a> | 2015-10-05<br>2015-08-29<br>2015-04-08<br>2014-10-09<br>2014-08-16 | Legacy P-band line;<br>Matches L-band legacy line 32511 |
| 33008          | permaf            | <a href="#">14116</a>                                                                                                     | 2014-08-16                                                         | Legacy P-band line;<br>Matches L-band legacy line 32511 |
| 08509          | kougar            | <a href="#">15142</a><br><a href="#">15124</a><br><a href="#">15039</a><br><a href="#">14144</a><br><a href="#">14117</a> | 2015-10-05<br>2015-08-29<br>2015-04-08<br>2014-10-09<br>2014-08-16 | Legacy P-band line;<br>Matches L-band legacy line 08534 |
| 08601          | permaf            | <a href="#">14116</a>                                                                                                     | 2014-08-16                                                         | Legacy P-band line;<br>Matches L-band legacy line 08534 |
| 03106          | ambler            | <a href="#">15142</a><br><a href="#">15124</a><br><a href="#">15039</a><br><a href="#">14144</a><br><a href="#">14117</a> | 2015-10-05<br>2015-08-29<br>2015-04-08<br>2014-10-09<br>2014-08-16 | Legacy P-band line;<br>Matches L-band legacy line 03108 |
| 03101          | permaf            | <a href="#">14116</a>                                                                                                     | 2014-08-16                                                         | Legacy P-band line;<br>Matches L-band legacy line 03108 |
| 03107          | ivotuk            | <a href="#">15142</a><br><a href="#">15124</a><br><a href="#">15039</a>                                                   | 2015-10-05<br>2015-08-29<br>2015-04-08                             | Legacy P-band line;<br>Matches L-band legacy line 03109 |



|       |        |                                                                                                                           |                                                                    |                                                         |
|-------|--------|---------------------------------------------------------------------------------------------------------------------------|--------------------------------------------------------------------|---------------------------------------------------------|
|       |        | <a href="#">14144</a>                                                                                                     | 2014-10-09                                                         |                                                         |
| 03102 | permaf | <a href="#">14116</a>                                                                                                     | 2014-08-16                                                         | Legacy P-band line;<br>Matches L-band legacy line 03109 |
| 34505 | atqasu | <a href="#">15142</a><br><a href="#">15124</a><br><a href="#">15039</a><br><a href="#">14144</a><br><a href="#">14117</a> | 2015-10-05<br>2015-08-29<br>2015-04-08<br>2014-10-09<br>2014-08-16 | Legacy P-band line;<br>Matches L-band legacy line 34506 |
| 34503 | permaf | <a href="#">14116</a>                                                                                                     | 2014-08-16                                                         | Legacy P-band line;<br>Matches L-band legacy line 34506 |
| 15010 | barrow | <a href="#">15142</a><br><a href="#">15124</a><br><a href="#">15039</a><br><a href="#">14144</a><br><a href="#">14117</a> | 2015-10-05<br>2015-08-29<br>2015-04-08<br>2014-10-09<br>2014-08-16 | Legacy P-band line;<br>Matches L-band legacy line 15015 |
| 18517 | dhorse | <a href="#">15142</a><br><a href="#">15124</a><br><a href="#">15039</a><br><a href="#">14144</a><br><a href="#">14117</a> | 2015-10-05<br>2015-08-29<br>2015-04-08<br>2014-10-09<br>2014-08-16 | Legacy P-band line;<br>Matches L-band legacy line 18518 |
| 20007 | coldfo | <a href="#">15142</a><br><a href="#">15124</a><br><a href="#">15039</a><br><a href="#">14144</a><br><a href="#">14117</a> | 2015-10-05<br>2015-08-29<br>2015-04-08<br>2014-10-09<br>2014-08-16 | Legacy P-band line;<br>Matches L-band legacy line 20015 |

80  
81

**Table S35. Alaska Legacy L-band Flight Line Summary Data**

| <b>Line ID</b> | <b>Short Name</b> | <b>Flight Plan</b>    | <b>Date</b> | <b>Comments</b>                                       |
|----------------|-------------------|-----------------------|-------------|-------------------------------------------------------|
| 25509          | Permaf            | <a href="#">15147</a> | 2015-10-05  | Legacy L-band line; Matching P-band legacy line 25507 |
| 25510          | Permaf            | <a href="#">15147</a> | 2015-10-05  | Legacy L-band line; Matching P-band legacy line 25508 |
| 32511          | Permaf            | <a href="#">15147</a> | 2015-10-05  | Legacy L-band line; Matching P-band legacy line 32510 |
| 08534          | Permaf            | <a href="#">15147</a> | 2015-10-05  | Legacy L-band line; Matching P-band legacy line 08509 |
| 03108          | Permaf            | <a href="#">15147</a> | 2015-10-05  | Legacy L-band line; Matching P-band legacy line 03106 |
| 03109          | Permaf            | <a href="#">15147</a> | 2015-10-05  | Legacy L-band line; Matching P-band legacy line 03107 |
| 34506          | Permaf            | <a href="#">15147</a> | 2015-10-05  | Legacy L-band line; Matching P-band legacy line 34505 |
| 15015          | Permaf            | <a href="#">15147</a> | 2015-10-05  | Legacy L-band line; Matching P-band legacy line 15010 |
| 18518          | Permaf            | <a href="#">15147</a> | 2015-10-05  | Legacy L-band line; Matching P-band legacy line 18517 |
| 20015          | Permaf            | <a href="#">15147</a> | 2015-10-05  | Legacy L-band line; Matching P-band legacy line 20007 |

82

83 **5.2 L-band SAR Legacy Flight Lines - BERMS**

84 Legacy L-band boreal forest sampling over BERMS  
 85 and Kenaston SK (**Figure S20**) was performed during  
 86 the CanEx 2010 boreal forest field campaign for  
 87 SMAP [Maggai et al. 2012; Djamai et al. 2015] and as  
 88 one of the AirMOSS regular sampling sites  
 89 [Moghaddam et al. 2016].

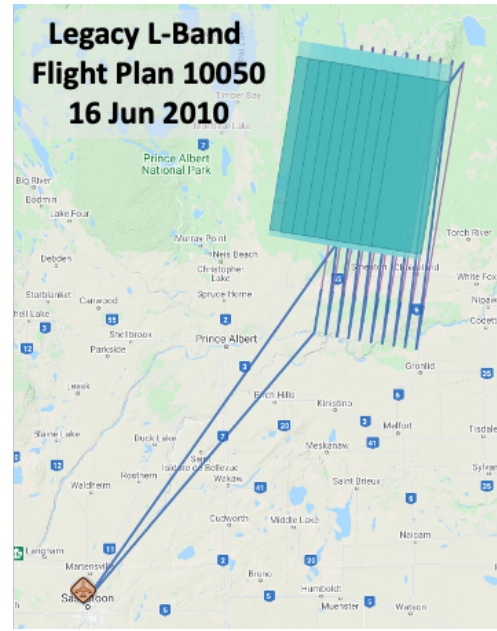

Figure S20. Legacy L-band flight lines acquired over the BERMS site during the SMAP CANEX-2010 campaign. These lines link L-band SAR acquired during ABoVE to BOREAS era measurements [Sellars et al. 1994; 1997]. See Table S3 for flight line details. © Google Maps

90  
91  
92  
93  
94  
95  
96  
97  
98  
99

**Table S36. BERMS-C Grid Legacy L-band Flight Line Summary Data**

| Line ID | Short Name | Flight Plan           | Date       | Comments                                                            |
|---------|------------|-----------------------|------------|---------------------------------------------------------------------|
| 00901   | bermsC     | <a href="#">10050</a> | 2010-06-16 | <a href="#">BERMS boreal forest grid</a> ; SMAP CanEx 2010 Campaign |
| 00902   | bermsC     | <a href="#">10050</a> | 2010-06-16 | <a href="#">BERMS boreal forest grid</a> ; SMAP CanEx 2010 Campaign |
| 00903   | bermsC     | <a href="#">10050</a> | 2010-06-16 | <a href="#">BERMS boreal forest grid</a> ; SMAP CanEx 2010 Campaign |
| 00904   | bermsC     | <a href="#">10050</a> | 2010-06-16 | <a href="#">BERMS boreal forest grid</a> ; SMAP CanEx 2010 Campaign |
| 00905   | bermsC     | <a href="#">10050</a> | 2010-06-16 | <a href="#">BERMS boreal forest grid</a> ; SMAP CanEx 2010 Campaign |
| 00906   | bermsC     | <a href="#">10050</a> | 2010-06-16 | <a href="#">BERMS boreal forest grid</a> ; SMAP CanEx 2010 Campaign |
| 00907   | bermsC     | <a href="#">10050</a> | 2010-06-16 | <a href="#">BERMS boreal forest grid</a> ; SMAP CanEx 2010 Campaign |
| 00908   | bermsC     | <a href="#">10050</a> | 2010-06-16 | <a href="#">BERMS boreal forest grid</a> ; SMAP CanEx 2010 Campaign |
| 00909   | bermsC     | <a href="#">10050</a> | 2010-06-16 | <a href="#">BERMS boreal forest grid</a> ; SMAP CanEx 2010 Campaign |
| 00910   | bermsC     | <a href="#">10050</a> | 2010-06-16 | <a href="#">BERMS boreal forest grid</a> ; SMAP CanEx 2010 Campaign |

00 **6 Acronyms and Abbreviations**

01 **Table S37. List of Acronyms and Abbreviations**

| Acronym | Name                                                                                   | Description                                                                                                                                                                                                                                                                                                                                                                                                    |
|---------|----------------------------------------------------------------------------------------|----------------------------------------------------------------------------------------------------------------------------------------------------------------------------------------------------------------------------------------------------------------------------------------------------------------------------------------------------------------------------------------------------------------|
| ABoVE   | Arctic Boreal Vulnerability Experiment ( <a href="#">ABoVE</a> )                       | NASA Terrestrial Ecology Program’s 10-year community field experiment designed to evaluate the vulnerability/resilience of Arctic ecosystems to change                                                                                                                                                                                                                                                         |
| AirMOSS | Airborne Microwave Observatory of Subcanopy and Subsurface ( <a href="#">AirMOSS</a> ) | An EV-S1 investigation deploying an airborne P-band SAR based on the UAVSAR/L-band system (PI M. Moghaddam). AirMOSS made flights over BERMS (2012-2015) and Alaska (2014, 2015) providing legacy data for ABoVE.                                                                                                                                                                                              |
| AirSWOT | Airborne instrument for supporting the SWOT mission ( <a href="#">AirSWOT</a> )        | AirSWOT is an airborne instrument for supporting the SWOT mission. AirSWOT is designed to make interferometric measurements similar to those that will be made in space by SWOT. AirSWOT data will also be used to help calibrate and validate SWOT data and can be used additionally for science studies in their own right.                                                                                  |
| ALT     | Active Layer Thickness (ALT)                                                           | Active Layer Thickness (ALT), defined as the maximum depth of seasonally thawed soil overlying permafrost, is critical for understanding the effects of climate warming, disturbance, and hydrologic changes on permafrost degradation in cold regions                                                                                                                                                         |
| BERMS   | Boreal Ecosystem Research and Monitoring Sites ( <a href="#">BERMS</a> )               | The Boreal Ecosystem Research and Monitoring Sites (BERMS) are located in the southern edge of the boreal plains ecozone in Saskatchewan, Canada. The four BERMS sites, covering 4 different forest vegetation types common to the Boreal Plains are: Fen, Old Jack Pine (OJP), Old Black Spruce (OBS), and Old Aspen (OA). ‘Old’ refers to the monitoring site being located within a mature stand of trees.  |
| BIOMASS | <a href="#">BIOMASS</a> (mission name)                                                 | Carrying a novel P-band synthetic aperture radar, the Biomass mission is designed to deliver crucial information about the state of our forests and how they are changing, and to further our knowledge of the role forests play in the carbon cycle. planned for launch by the European Space Agency (ESA) in August 2023.                                                                                    |
| BOREAS  | Boreal Ecosystem–Atmosphere Study ( <a href="#">BOREAS</a> )                           | The Boreal Ecosystem-Atmosphere Study (BOREAS) was a large-scale international interdisciplinary experiment in the boreal forests of central Canada. Its focus was improving our understanding of the exchanges of radiative energy, sensible heat, water, CO2 and trace gases between the boreal forest and the lower atmosphere.                                                                             |
| CALM    | Circumpolar Active Layer Monitoring network ( <a href="#">CALM</a> )                   | The primary goal of the Circumpolar Active Layer Monitoring (CALM) program is to observe the response of the active layer and near-surface permafrost to climate change over long (multi-decadal) time scales.                                                                                                                                                                                                 |
| CanEx   | SMAP CanEx 2010                                                                        | 2010 Canadian soil moisture field campaign run by the SMAP team over the BERMS sites [Magagi 2012]                                                                                                                                                                                                                                                                                                             |
| CCRN    | Canadian Changing Cold Regions Network ( <a href="#">CCRN</a> )                        | CCRN’s overall aims were to integrate existing and new sources of data with improved predictive and observational tools to understand, diagnose and predict interactions amongst the cryospheric, ecological, hydrological, and climatic components of the changing Earth system at multiple scales, with a geographic focus on Western Canada’s rapidly changing cold interior. CCRN operated from 2013-2018. |
| CFS     | Canadian Forest Service ( <a href="#">CFS</a> )                                        | The Canadian Forest Service is the national and international voice for Canada’s forest sector. We are part of Natural Resources Canada, a federal government department, and have an office in Ottawa and <a href="#">6 research centres</a> across the country. We collaborate closely with Canada’s provinces and territories to ensure our forests are sustainable and healthy                             |

|         |                                                                               |                                                                                                                                                                                                                                                                                                                                                                                                                                                                                                                                                                                                                                                    |
|---------|-------------------------------------------------------------------------------|----------------------------------------------------------------------------------------------------------------------------------------------------------------------------------------------------------------------------------------------------------------------------------------------------------------------------------------------------------------------------------------------------------------------------------------------------------------------------------------------------------------------------------------------------------------------------------------------------------------------------------------------------|
| CIPHA   | Climate Impacts on Productivity and Health of Aspen ( <a href="#">CIPHA</a> ) | The Canadian Forest Service’s Climate Impacts on Productivity and Health of Aspen (CIPHA) study includes a network of 180 research plots aimed at tracking dieback and changes in the growth of aspen forests across the boreal forest. <a href="#">Trembling aspen</a> , also known locally as “white poplar,” is the most abundant deciduous tree in Canada’s boreal forest, where it is important both ecologically and commercially. Recent severe droughts have led to widespread dieback and decline of aspen and other types of forests across large areas of west-central Canada, prompting concerns for the future in a changing climate. |
| DAAC    | Distributed Active Archive Center                                             | The NASA TE program data, including <a href="#">ABoVE data</a> , are archived at the ORNL DAAC                                                                                                                                                                                                                                                                                                                                                                                                                                                                                                                                                     |
| DLR     | German Space Agency ( <a href="#">DLR</a> )                                   | DLR is the Federal Republic of Germany's research centre for aeronautics and space. We conduct research and development activities in the fields of aeronautics, space, energy, transport, security and digitalisation.                                                                                                                                                                                                                                                                                                                                                                                                                            |
| DOY     | Day of Year ( <a href="#">DOY</a> )                                           | The Day-of-Year (DOY) numbering system is a common format used in research data and by the military. The Day-of-Year system ignores the existence of months and numbers each day of the year consecutively.                                                                                                                                                                                                                                                                                                                                                                                                                                        |
| EV-S1   | Earth Ventures Sub-orbital ( <a href="#">EV-1</a> )                           | The EV-S1 airborne-science investigations are Principal Investigator-led, temporally-sustained, airborne-science investigations. They are broader in scope than typical airborne-science missions due to multiple deployments, sustained science data collection and operations spanning several years. The AirMOSS EV-S1 mission and ABoVE precursor ran from 2010-2015                                                                                                                                                                                                                                                                           |
| F-SAR   | <a href="#">F-SAR</a> – DLR’s New Airborne SAR System                         | DLR’s advanced airborne SAR testbed for technology and remote sensing applications. F-SAR operates fully polarimetric at X-, C-, S-, L- and P-bands and features single-pass polarimetric interferometric SAR (PolInSAR) capabilities in X- and S-bands [Reigber 2013].; flew over the ABoVE domain in August 2018                                                                                                                                                                                                                                                                                                                                 |
| FMS     | Flight Management System ( <a href="#">FMS</a> )                              | A Flight Management System (FMS) is an on-board multi-purpose navigation, performance, and aircraft operations computer designed to provide virtual data and operational harmony between closed and open elements associated with a flight from pre-engine start and take-off, to landing and engine shut-down.                                                                                                                                                                                                                                                                                                                                    |
| GeoSAR  | Geographic Synthetic Aperture Radar (GeoSAR)                                  | GeoSAR was an airborne state-of-the-art, dual-band (P-band and X-band), dual-sided, single-pass interferometric mapping radar, designed to efficiently map wide-area, both top vegetation canopies and the terrain beneath the canopy. GeoSAR was a precursor of the UAVSAR instrument.                                                                                                                                                                                                                                                                                                                                                            |
| GNWT    | Government of the Northwest Territories ( <a href="#">GNWT</a> )              | GNWT supports ABoVE activities in the NWT, especially via its Climate and Environment & Energy programs. See the <a href="#">2030 NWT Climate Change Strategic Framework</a>                                                                                                                                                                                                                                                                                                                                                                                                                                                                       |
| GPS     | Global Positioning System ( <a href="#">GPS</a> )                             | The Global Positioning System (GPS) is a U.S.-owned utility that provides users with positioning, navigation, and timing (PNT) services. This system consists of three segments: the space segment, the control segment, and the user segment. The U.S. Space Force develops, maintains, and operates the space and control segments.                                                                                                                                                                                                                                                                                                              |
| GTN-P   | Global Terrestrial Network for Permafrost ( <a href="#">GTN-P</a> )           | The Global Terrestrial Network for Permafrost (GTN-P) is the primary international programme concerned with monitoring permafrost parameters. GTN-P was developed in the 1990s by the <a href="#">International Permafrost Association (IPA)</a> under the <a href="#">Global Climate Observing System (GCOS)</a> and the <a href="#">Global Terrestrial Observing Network (GTOS)</a> , with the long-term goal of obtaining a comprehensive view of the spatial structure, trends and variability of changes in the active layer thickness and permafrost temperature.                                                                            |
| HEL CIA | High Elevation & Latitude Climate Change Impacts & Adaptation (HEL CIA)       | A collaborative initiative under the NRCAN-CFS Forest Change Program                                                                                                                                                                                                                                                                                                                                                                                                                                                                                                                                                                               |

|             |                                                                              |                                                                                                                                                                                                                                                                                                                                                                                                                                                                                                                                                                                                                                                                                                                                                                          |
|-------------|------------------------------------------------------------------------------|--------------------------------------------------------------------------------------------------------------------------------------------------------------------------------------------------------------------------------------------------------------------------------------------------------------------------------------------------------------------------------------------------------------------------------------------------------------------------------------------------------------------------------------------------------------------------------------------------------------------------------------------------------------------------------------------------------------------------------------------------------------------------|
| InSAR       | Interferometric Synthetic Aperture Radar ( <a href="#">InSAR</a> )           | Interferometric Synthetic Aperture Radar (InSAR) is an effective way to measure changes in land surface altitude. InSAR makes high-density measurements over large areas by using radar signals from Earth-orbiting satellites to measure changes in land-surface altitude at high degrees of measurement resolution and spatial detail. Synthetic Aperture Radar (SAR) imagery is produced by reflecting radar signals off a target area and measuring the two-way travel time back to the satellite. The SAR interferometry technique uses two SAR images of the same area acquired at different times and "interferes" (differences) them, resulting in maps called interferograms that show ground-surface displacement (range change) between the two time periods. |
| ISRO        | Indian Space Research Organization ( <a href="#">ISRO</a> )                  | ISRO's vision is to harness space technology for national development, while pursuing space science research and planetary exploration. ISRO owns the LS-ASAR airborne instrument and is NASA's partner in the NISAR mission.                                                                                                                                                                                                                                                                                                                                                                                                                                                                                                                                            |
| KaSPAR      | Ka-band SWOT Phenomenology Airborne Radar ( <a href="#">KaSPAR</a> )         | The core of AirSWOT is the Ka-band SWOT Phenomenology Airborne Radar (KaSPAR). It collects two swaths of across-track interferometry data - between nadir and 1 km and between 1 km and 5 km, respectively - which can be used to obtain centimeter-level topographic maps of water surfaces. In addition, KaSPAR has an along-track interferometer that can be used to measure the temporal decorrelation of water surfaces, as well as the water radial velocity.                                                                                                                                                                                                                                                                                                      |
| LiDAR       | Light Detection and Ranging ( <a href="#">lidar</a> )                        | Lidar is a remote sensing method that uses light in the form of a pulsed laser to measure ranges (variable distances) to the Earth. These light pulses—combined with other data recorded by the airborne system — generate precise, three-dimensional information about the shape of the Earth and its surface characteristics.                                                                                                                                                                                                                                                                                                                                                                                                                                          |
| LS-ASAR     | L- and S-Band-Airborne SAR ( <a href="#">LS-ASAR</a> )                       | As a precursor to the NISAR mission, ISRO has developed a L- and S-Band-Airborne SAR (LS-ASAR) to prepare the community to maximize the scientific and societal benefits of NISAR data [Ramanujam 2016; 2019; Mehra 2019]. LS-ASAR operates in Dual, Quad, and Hybrid and Polarization modes in both L- and S-bands. It covers incidence angles from 24°-77°                                                                                                                                                                                                                                                                                                                                                                                                             |
| LTER        | Long Term Ecological Research ( <a href="#">LTER</a> )                       | The LTER Network was founded in 1980 by the National Science Foundation with the recognition that long-term research could help unravel the principles and processes of ecological science, which frequently involves long-lived species, legacy influences, and rare events. LTER's mission is to provide the scientific community, policy makers, and society with the knowledge and predictive understanding necessary to conserve, protect, and manage the nation's ecosystems, their biodiversity, and the services they provide.                                                                                                                                                                                                                                   |
| LVIS        | Land, Vegetation, and Ice Sensor ( <a href="#">LVIS</a> )                    | LVIS is an airborne, full waveform scanning laser altimeter which produces topographic maps with decimeter accuracy as well as vegetation vertical height and structure measurements [Blair 1999a,b]. LVIS became a NASA Facility Instrument in 2019.                                                                                                                                                                                                                                                                                                                                                                                                                                                                                                                    |
| NEON        | National Ecological Observatory Network ( <a href="#">NEON</a> )             | NSF's National Ecological Observatory Network (NEON) program provides open, continental-scale data across the United States that characterize and quantify complex, rapidly changing ecological processes. Its Tundra (D-19) and Taiga (D-18) observatories in Alaska are key ground truth sites for ABoVE airborne SAR data collections                                                                                                                                                                                                                                                                                                                                                                                                                                 |
| NGEE-Arctic | Next Generation Ecological Experiment-Arctic ( <a href="#">NGEE-Arctic</a> ) | The Next-Generation Ecosystem Experiments (NGEE Arctic) is a 10-year project (2012—2022) to improve our predictive understanding of carbon (C)-rich Arctic system processes and feedbacks to climate. This is achieved through experiments, observations, and synthesis of existing datasets that strategically inform model process representation and parameterization, and that enhance the knowledge base required for model initialization, calibration, and evaluation. The NGEE-Arctic Seward Peninsula and Barrow area sites provide critical ground truth data for ABoVE airborne SAR data                                                                                                                                                                      |

|          |                                                                                  |                                                                                                                                                                                                                                                                                                                                                                                                                                                                                                                                                                                                                                    |
|----------|----------------------------------------------------------------------------------|------------------------------------------------------------------------------------------------------------------------------------------------------------------------------------------------------------------------------------------------------------------------------------------------------------------------------------------------------------------------------------------------------------------------------------------------------------------------------------------------------------------------------------------------------------------------------------------------------------------------------------|
| NISAR    | NASA-ISRO SAR ( <a href="#">NISAR</a> ) mission                                  | NISAR is a joint Earth-observing mission between <a href="#">NASA</a> and the <a href="#">Indian Space Research Organization (ISRO)</a> with the goal to make global measurements of the causes and consequences of land surface changes using advanced radar imaging. To be launched in early 2023, NISAR will employ L- and S-band SARs to measure Earth's changing ecosystems, dynamic surfaces, and ice masses. NISAR will observe Earth's land and ice-covered surfaces globally with 12-day regularity on ascending and descending passes, sampling Earth on average every 6 days for a baseline 3-year mission [Rosen 2017] |
| NoFC     | Northern Forestry Centre ( <a href="#">NoFC</a> )                                | The Northern Forestry Centre is one of five research centres operated by the Canadian Forest Service. It is located in Edmonton, Alberta. It's primary research areas are: Boreal ecosystem ecology, Climate Change and forests research, Land reclamation, and Wildland fire. ABoVE SAR flight lines target many of its forest inventory, CIPHA and HELCIA sites for ground truth measurements                                                                                                                                                                                                                                    |
| NWT      | Northwest Territories (NWT)                                                      | Northwest Territories, region of northern and northwestern Canada encompassing ~1.35 Mkm <sup>2</sup> of forests and tundra. The NWT are bordered by Nunavut to the east, the provinces of <a href="#">Saskatchewan</a> , <a href="#">Alberta</a> , and <a href="#">British Columbia</a> to the south, and <a href="#">Yukon</a> to the west. NWT lands are a focal point for ABoVE airborne SAR campaigns, with Yellowknife serving as a base of operations                                                                                                                                                                       |
| OAS      | Old Aspen ( <a href="#">OAS</a> )                                                | BERMS Flux tower site; CA-Oas: Saskatchewan - Western Boreal, Mature Aspen; 53.62889° N, 106.19779° W, elevation of 600.63 m, BOREAS 1994, 1996, BERMS climate and flux measurements began Dec. 1996. The Old Aspen site ended operations in 2017 and has since been decommissioned.                                                                                                                                                                                                                                                                                                                                               |
| OBS      | Old Black Spruce ( <a href="#">OBS</a> )                                         | BERMS Flux tower site; CA-Obs: Saskatchewan - Western Boreal, Mature Black Spruce; 53.98717° N, 105.11779° W, elevation of 628.94 m, BOREAS 1994, 1996, BERMS climate measurements began Dec. 1996 and flux measurements in Apr. 1999                                                                                                                                                                                                                                                                                                                                                                                              |
| OJP      | Old Jack Pine ( <a href="#">OJP</a> )                                            | BERMS Flux tower site; CA-Ojp: Saskatchewan - Western Boreal, Mature Jack Pine; 53.91634° N, 104.69203° W, elevation of 579.27 m, BOREAS 1994, BERMS climate measurements began Mar. 1997 and flux measurements Aug. 1999                                                                                                                                                                                                                                                                                                                                                                                                          |
| ORNL     | Oak Ridge National Laboratory ( <a href="#">ORNL</a> )                           | Home of the ABoVE DAAC and NGEE-Arctic leadership                                                                                                                                                                                                                                                                                                                                                                                                                                                                                                                                                                                  |
| PALSAR   | Phased Array type L-band Synthetic Aperture Radar ( <a href="#">PALSAR</a> )     | The Phased Array type L-band Synthetic Aperture Radar (PALSAR, launched in 2006) is an active microwave sensor using L-band frequency to achieve cloud-free and day-and-night land observation. PALSAR provides 10m resolution in a conventional mode, but can acquire a 250 to 350 km width of SAR images (depending on the number of scans) at the expense of spatial resolution. The development of the PALSAR is a joint project between JAXA and the Japan Resources Observation System Organization (JAROS). PALSAR acquisitions across the ABoVE domain provide a valuable baseline for ABoVE airborne SAR comparisons.     |
| PALSAR-2 | Phased Array type L-band Synthetic Aperture Radar 2 ( <a href="#">PALSAR-2</a> ) | PALSAR-2 (launched in 2014 aboard ALOS-2) is the successor to JAXA's Phased Array type L-band Synthetic Aperture Radar (PALSAR). ALOS-2/PALSAR-2 has a spotlight mode (1m × 3m resolution in azimuth × range direction) as well as right and left viewing capabilities.                                                                                                                                                                                                                                                                                                                                                            |
| PDO      | Permafrost Dynamics Observatory (PDO)                                            | The PDO algorithm uses L-band InSAR to measure seasonal surface subsidence due to the thawing of the active layer and the P-band backscatter to measure soil moisture. The combined PDO algorithm estimates seasonal subsidence, ALT, and the vertical soil moisture profile [Michaelides 2021; Chen 2021a,b]                                                                                                                                                                                                                                                                                                                      |
| PermASAR | permafrost airborne SAR experiment ( <a href="#">PermASAR</a> )                  | DLR's permafrost airborne SAR experiment ( <a href="#">PermASAR</a> ) deployed F-SAR to northern Canada in August 2018 and April 2019. F-SAR flight lines sampled many ABoVE L-band transects                                                                                                                                                                                                                                                                                                                                                                                                                                      |

|          |                                                                                     |                                                                                                                                                                                                                                                                                                                                                                                                                                                                                                                                                                                                                            |
|----------|-------------------------------------------------------------------------------------|----------------------------------------------------------------------------------------------------------------------------------------------------------------------------------------------------------------------------------------------------------------------------------------------------------------------------------------------------------------------------------------------------------------------------------------------------------------------------------------------------------------------------------------------------------------------------------------------------------------------------|
| POLAR    | Polar Knowledge Canada ( <a href="#">POLAR</a> )                                    | Polar Knowledge Canada (POLAR) is responsible for advancing Canada’s knowledge of the Arctic, strengthening Canadian leadership in polar science and technology, and promoting the development and distribution of knowledge of other circumpolar regions, including Antarctica. POLAR operates the Canadian High Arctic Research Station (CHARS) campus and conducts world-class cutting edge Arctic research out of this extraordinary facility. POLAR is ABoVE’s primary Canadian partner.                                                                                                                              |
| PolInSAR | Polarimetric Interferometric Synthetic Aperture Radar ( <a href="#">PolInSAR</a> )  | Known by the unwieldy acronym, POLinSAR, the technique combines varying the orientation, or polarisation, of radar signals (POLarimetry) with the analysis of the phase differences in the signal to produce differential range and range-change measurements (interferometry) from two or more images captured by synthetic aperture radars (SARs). Taken together, polarimetry and interferometry offers the potential to see the Earth in three dimensions.                                                                                                                                                             |
| PPA      | Platform Precision Autopilot ( <a href="#">PPA</a> )                                | The real-time platform control system that confines the repeat flight path to within a 10 m tube over a 200 km course in conditions of calm to light turbulence; enables repeat-pass SAR interferometry for the airborne L- and P-band sensors                                                                                                                                                                                                                                                                                                                                                                             |
| RADARSAT | <a href="#">RADARSAT</a> (mission name)                                             | <a href="#">RADASAT-1</a> (launched 4 November 1995 by the Canadian Space Agency) was a C-band radar with 8m x 8m spatial resolution.<br><a href="#">RADASAT-2</a> (launched 14 December 2007) was a C-band radar with 1m x 3m spatial resolution in spotlight mode. It has routine left- and right-looking operation and increased re-visit frequency for improved monitoring efficiencies. It offers enhanced marine surveillance, ice monitoring, disaster management, environmental monitoring, resource management and mapping in the Arctic.                                                                         |
| RCM      | RADARSAT Constellation Mission ( <a href="#">RCM</a> )                              | The RADARSAT Constellation Mission (RCM) is Canada's new generation of Earth observation C-band radars. Launched on June 12, 2019 by the Canadian Space Agency, the three identical satellites are capable of scanning Earth day or night and in any weather conditions with 1m x 3m spatial resolution in spotlight mode. The three-satellite configuration allows for daily revisits of Canada's vast territory and maritime approaches, as well as access to the Arctic up to four times a day.                                                                                                                         |
| ReSALT   | remotely sensed active layer thickness (ReSALT)                                     | An algorithm which uses spaceborne InSAR measurements of the seasonal deformation of the thawing active layer to estimate the total active layer thickness [Schaefer 2015]                                                                                                                                                                                                                                                                                                                                                                                                                                                 |
| RH100    | Relative Height 100 <sup>th</sup> percentile ( <a href="#">RH100</a> )              | LVIS canopy height is provided as the mean height (in meters) above ground of the received waveform signal that was the first reflection off the top of the canopy (RH100). RH100 or relative height is the 100 <sup>th</sup> percentile of waveform energy relative to ground elevation. Derived from the L2B LIDAR metric RH100 data product.                                                                                                                                                                                                                                                                            |
| ROSE-L   | Copernicus Radar Observation System for Europe in L-band ( <a href="#">ROSE-L</a> ) | With launch planned in 2028, the new high-priority Copernicus Radar Observation System for Europe in L-band (ROSE-L) environmental monitoring mission will provide information for monitoring forest type and cover in support of biomass estimation, as well as soil moisture, vegetation and land ice – as part of Europe’s Copernicus programme. The mission will automatically map and monitor sea and land ice, greatly helping climate change research. ROSE-L will provide continuous day-and-night all-weather monitoring of Earth’s land, oceans and ice, and offer frequent images at a high spatial resolution. |
| SAR      | Synthetic Aperture Radar ( <a href="#">SAR</a> )                                    | Synthetic-aperture radar (SAR) remote sensing is usually implemented by mounting, on a moving platform such as an aircraft or spacecraft, a single beam-forming antenna from which a target scene is repeatedly illuminated with pulses of microwaves at wavelengths anywhere from a meter down to millimeters. A sequence of acquisitions from a shorter antenna are combined to simulate a much larger antenna (the synthetic aperture), thus increasing the spatial resolution data                                                                                                                                     |

|            |                                                                                |                                                                                                                                                                                                                                                                                                                                                                                                                                                                                                                                                                                                                                                                                                                                                                                                                                                                                                                                                     |
|------------|--------------------------------------------------------------------------------|-----------------------------------------------------------------------------------------------------------------------------------------------------------------------------------------------------------------------------------------------------------------------------------------------------------------------------------------------------------------------------------------------------------------------------------------------------------------------------------------------------------------------------------------------------------------------------------------------------------------------------------------------------------------------------------------------------------------------------------------------------------------------------------------------------------------------------------------------------------------------------------------------------------------------------------------------------|
| SDC        | Surface Deformation and Change ( <a href="#">SDC</a> )                         | The Surface Deformation and Change (SDC) Targeted Observable will use deformation measurements, such as Synthetic Aperture Radar Interferometry (InSAR), to understand the dynamics of earthquakes, volcanoes, landslides, glaciers, groundwater and the deep interior; for quantifying the rates and driving processes of sea-level change and landscape change; and for supporting hazard forecasts and disaster impact assessments. SDC architectures are being studied for a potential launch in the late 2020s.                                                                                                                                                                                                                                                                                                                                                                                                                                |
| Sentinel-1 | <a href="#">Sentinel-1</a> (mission name)                                      | The Sentinel-1 mission is the European Radar Observatory for the Copernicus joint initiative of the European Commission (EC) and the European Space Agency (ESA). The Sentinel-1 mission comprises a constellation of two polar-orbiting satellites, operating day and night performing C-band synthetic aperture radar imaging, enabling them to acquire imagery regardless of the weather. The Sentinel-1 mission includes C-band imaging operating in four exclusive imaging modes with different resolution (down to 5 m) and coverage (up to 400 km). It provides dual polarisation capability, very short revisit times and rapid product delivery. Sentinel-1A was launched on 3 April 2014. Sentinel-1B was launched on 25 April 2016. Each has an operational lifespan of seven years with consumables for 12 years. Sentinel-1C and Sentinel-1D are planned to replace the first two satellites at the end of their operational lifespan. |
| SMAP       | Soil Moisture Active/Passive ( <a href="#">SMAP</a> )                          | SMAP is an Earth satellite mission designed to measure and map Earth's soil moisture and freeze/thaw state to better understand terrestrial water, carbon and energy cycles                                                                                                                                                                                                                                                                                                                                                                                                                                                                                                                                                                                                                                                                                                                                                                         |
| SnowEx     | Snow Experiment ( <a href="#">SnowEx</a> )                                     | SnowEx is a five-year program initiated and funded by the NASA Terrestrial Hydrology Program to address the most important gaps in snow remote sensing knowledge. A joint SnowEx-ABOVE tundra-taiga snowscapes campaign is planned for Alaska during the January – May 2023 period.                                                                                                                                                                                                                                                                                                                                                                                                                                                                                                                                                                                                                                                                 |
| SWOT       | Surface Water and Ocean Topography ( <a href="#">SWOT</a> )                    | The SWOT mission will be NASA's first global survey of Earth's surface water. SWOT is being jointly developed by NASA and <a href="#">Centre National D'Etudes Spatiales</a> (CNES) with contributions from the <a href="#">Canadian Space Agency</a> (CSA) and <a href="#">United Kingdom Space Agency</a> .                                                                                                                                                                                                                                                                                                                                                                                                                                                                                                                                                                                                                                       |
| TomoSAR    | tomographic SAR (tomoSAR)                                                      | Synthetic aperture radar tomography (TomoSAR) at lower frequencies allows the reconstruction of the 3-D radar reflectivity of volume scatterers allowing access to their physical 3-D structure by means of multiangular SAR acquisitions. The performance of the reconstruction critically depends on the number and (spatial) distribution of the tomographic acquisitions (tracks).                                                                                                                                                                                                                                                                                                                                                                                                                                                                                                                                                              |
| UAVSAR     | Uninhabited Aerial Vehicle Synthetic Aperture Radar ( <a href="#">UAVSAR</a> ) | NASA's airborne L-band SAR; a compact pod-mounted polarimetric instrument for interferometric repeat-track observations                                                                                                                                                                                                                                                                                                                                                                                                                                                                                                                                                                                                                                                                                                                                                                                                                             |
| VWC        | Volumetric Water Content (VWC)                                                 | The volumetric water content is the ratio of the volume of water to the unit volume of soil. Volumetric water content can be expressed as ratio, percentage or depth of water per depth of soil (assuming a unit surface area), such as inches of water per foot of soil.                                                                                                                                                                                                                                                                                                                                                                                                                                                                                                                                                                                                                                                                           |

02  
03  
04



## 05 **7 Acknowledgments**

06 The L- and P-band SAR data acquisitions would not have been possible without the indefatigable  
07 support of our NASA pilots and flight crews. We thank John McGrath and the NASA AFRC C-20  
08 (N30502) team as well as Derek Rutovic and the NASA JSC G-III (N995NA) team. We also thank the  
09 instrument scientists, operators, and data processing team from the JPL Suborbital Radar Science and  
10 Engineering Team (334F) who were essential to the successful execution of these experiments and rapid  
11 processing of the resulting data products. The field work supporting the SAR campaigns was made  
12 possible by the excellent support from Dan Hodkinson, Sarah Sackett, and the ABoVE Logistics Office.  
13 Finally, we thank the data curation team at the Oak Ridge Distributed Active Archive Center for their  
14 support and expert advice.

15  
16 This work was supported by the NASA Terrestrial Ecology Program's Arctic-Boreal Vulnerability  
17 Experiment (ABoVE). A portion of this work was performed at the Jet Propulsion Laboratory,  
18 California Institute of Technology, under contract with National Aeronautics and Space Administration  
19 (80NM0018D0004).

20  
21 Copyright California Institute of Technology, 2024. All Rights Reserved. Government funding  
22 acknowledged.

23

## 24 8 References

- 25 Abe, T., Iwahana, G., Efremov, P. V., Desyatkin, A. R., Kawamura, T., Fedorov, A., Zhegusov, Y., Yanagiya,  
26 K., and Tadono, T.: Surface displacement revealed by L-band InSAR analysis in the Mayya area, Central  
27 Yakutia, underlain by continuous permafrost, *Earth Planets Space*, 72, 138, [https://doi.org/10.1186/s40623-](https://doi.org/10.1186/s40623-020-01266-3)  
28 020-01266-3, 2020.
- 29 Airborne Imaging: Final LiDAR processing & vertical accuracy report: Prepared for the U.S. Fish and Wildlife  
30 Service, in: *LiDAR Imagery & DEM Model for Yukon Delta National Wildlife Refuge—Near Angyaravak*  
31 *Bay, Alaska*, Airborne Imaging, Calgary, AB, Canada, 28, 2011.
- 32 Allen, B. D., Braun, S. A., Crawford, J. H., Jensen, E. J., Miller, C. E., Moghaddam, M., and Maring, H.:  
33 Proposed investigations from NASA’s Earth Venture-1 (EV-1) airborne science selections, in: 2010 IEEE  
34 International Geoscience and Remote Sensing Symposium, 2010 IEEE International Geoscience and Remote  
35 Sensing Symposium, 2575–2578, <https://doi.org/10.1109/IGARSS.2010.5651920>, 2010.
- 36 Alonzo, M., Dial, R. J., Schulz, B. K., Andersen, H.-E., Lewis-Clark, E., Cook, B. D., and Morton, D. C.:  
37 Mapping tall shrub biomass in Alaska at landscape scale using structure-from-motion photogrammetry and  
38 lidar, *Remote Sens. Environ.*, 245, 111841, <https://doi.org/10.1016/j.rse.2020.111841>, 2020.
- 39 Altenau, E. H., Pavelsky, T. M., Moller, D., Lion, C., Pitcher, L. H., Allen, G. H., Bates, P. D., Calmant, S.,  
40 Durand, M., and Smith, L. C.: AirSWOT measurements of river water surface elevation and slope: Tanana  
41 River, AK, *Geophys. Res. Lett.*, 44, 181–189, <https://doi.org/10.1002/2016GL071577>, 2017.
- 42 Kenaston / Brightwater Creek Mesonet Site, SK - CCRNetwork:  
43 <http://www.ccrnetwork.ca/science/WECC/prairie/brightwater-creek.php>, last access: 30 April 2021.
- 44 Bakian-Dogaheh, K., Chen, R. H., Moghaddam, M., and Tabatabaenejad, A.: Electromagnetic scattering  
45 behavior of a new organic soil dielectric model for long-wavelength radar retrieval of permafrost active layer  
46 soil properties, 2020 IEEE International Geoscience and Remote Sensing Symposium, 2020.
- 47 Bakian-Dogaheh, K., R.H. Chen, M. Moghaddam, Y. Yi, and A. Tabatabaenejad. 2020. ABoVE:  
48 Active Layer Soil Characterization of Permafrost Sites, Northern Alaska, 2018. ORNL DAAC, Oak  
49 Ridge, Tennessee, USA. <https://doi.org/10.3334/ORN LDAAC/1759>
- 50 Banks, S. N., Ullmann, T., Duffe, J., Roth, A., King, D., Demers, A.-M., Hogg, A., Schmitt, A., Baumhauer, R.,  
51 and Dech, S.: Multi-frequency analysis of high resolution quad-pol Radarsat-2 and dual-pol TerraSAR-X  
52 data for land cover classification in Arctic Coastal Ecosystems, Mackenzie Delta, beaufort sea, 3548–3551,  
53 <https://doi.org/10.1109/IGARSS.2012.6350653>, 2012.
- 54 Banks, S. N., King, D. J., Merzouki, A., and Duffe, J.: Characterizing Scattering Behaviour and Assessing  
55 Potential for Classification of Arctic Shore and Near-Shore Land Covers with Fine Quad-Pol RADARSAT-2  
56 Data, *Can. J. Remote Sens.*, 40, 291–314, <https://doi.org/10.1080/07038992.2014.979487>, 2014.
- 57 Barr, A. G., Morgenstern, K., Black, T. A., McCaughey, J. H., and Nesic, Z.: Surface energy balance closure by  
58 the eddy-covariance method above three boreal forest stands and implications for the measurement of the  
59 CO<sub>2</sub> flux, *Agric. For. Meteorol.*, 140, 322–337, <https://doi.org/10.1016/j.agrformet.2006.08.007>, 2006.
- 60 Bennett, A. J., Thompson, W. L., and Mortenson, D. C.: Vital Signs Monitoring Plan Southwest Alaska Network:  
61 Inventory and Monitoring Program, *Natl. Park Serv.*, 2006.
- 62 Blair, J. B and Hofton, M.: ABoVE LVIS L2 Geolocated Surface Elevation Product, Version 1,  
63 <https://doi.org/10.5067/IA5WAX7K3YGY>, 2018.
- 64 Blomberg, E., Ulander, L. M. H., Tebaldini, S., and Ferro-Famil, L.: Evaluating P-Band TomoSAR for Biomass  
65 Retrieval in Boreal Forest, *IEEE Trans. Geosci. Remote Sens.*, 59, 3793–3804,  
66 <https://doi.org/10.1109/TGRS.2020.3020775>, 2021.

- 67 Bourgeau-Chavez, L. L., French, N. H. F., Grelick, S. E., Jenkins, L., Battaglia, M., Serocki, E., and Billmire, M.:  
68 ABoVE: Burn Severity, Fire Progression, Landcover and Field Data, NWT, Canada, 2014, ORNL DAAC,  
69 <https://doi.org/10.3334/ORNLDAAAC/1307>, 2016.
- 70 Bourgeau-Chavez, L. L., Grelick, S. E., Jenkins, L., Battaglia, M., Serocki, E., and Billmire, M.: ABoVE: Burn  
71 Severity, Fire Progression, and Field Data, NWT, Canada, 2015-2016, ORNL DAAC,  
72 <https://doi.org/10.3334/ORNLDAAAC/1548>, 2017.
- 73 Bourgeau-Chavez, L. L., Graham, J. A., Grelick, S. E., French, N. H. F., Battaglia, M., Hansen, D., and Tanzer,  
74 D.: ABoVE: Ecosystem Map, Great Slave Lake Area, Northwest Territories, Canada, 1997-2011, ORNL  
75 DAAC, <https://doi.org/10.3334/ORNLDAAAC/1695>, 2019a.
- 76 Bourgeau-Chavez, L. L., Battaglia, M., Kane, E. S., Cohen, L. M., and Tanzer, D.: ABoVE: Post-Fire and  
77 Unburned Vegetation Community and Field Data, NWT, Canada, 2018, ORNL DAAC,  
78 <https://doi.org/10.3334/ORNLDAAAC/1703>, 2019b.
- 79 Burns, L. E., Fugro Airborne Survey Corp., and Stevens Exploration Management Corp.: Final processed  
80 database for the airborne geophysical surveys of the Alaska Highway corridor, east-central Alaska: Alaska  
81 Division of Geological & Geophysical Surveys Geophysical Report 2006-8, 1 DVD.,  
82 <https://doi.org/10.14509/17761>, 2008.
- 83 Campbell, E. M., Antos, J. A., and vanAkker, L.: Resilience of southern Yukon boreal forests to spruce beetle  
84 outbreaks, *For. Ecol. Manag.*, 433, 52–63, <https://doi.org/10.1016/j.foreco.2018.10.037>, 2019.
- 85 Chapin, E., Chau, A., Chen, J., Heavey, B., Hensley, S., Lou, Y., Machuzak, R., and Moghaddam, M.: AirMOSS:  
86 An Airborne P-band SAR to measure root-zone soil moisture, in: 2012 IEEE Radar Conference, 2012 IEEE  
87 Radar Conference, 0693–0698, <https://doi.org/10.1109/RADAR.2012.6212227>, 2012.
- 88 Chapin, E., Flores, S., Harcke, L., Hawkins, B. P., Hensley, S., Michel, T. R., Muellerschoen, R. J., Shimada, J.  
89 G., Tung, W. W., and Veeramachaneni, C.: AirMOSS: L1 S-0 Polarimetric Data from AirMOSS P-band  
90 SAR, BERMS, Canada, 2012-2015, ORNL DAAC, <https://doi.org/10.3334/ORNLDAAAC/1406>, 2018.
- 91 Chen, A. C., Parsekian, A. D., Schaefer, K., Jafarov, E. E., Panda, S. K., Liu, L., Zhang, T., and Zebker, H. A.:  
92 Pre-ABoVE: Ground-penetrating Radar Measurements of ALT on the Alaska North Slope, ORNL DAAC,  
93 <https://doi.org/10.3334/ORNLDAAAC/1265>, 2015.
- 94 Chen, R. H., Tabatabaenejad, A., and Moghaddam, M.: A time-series active layer thickness retrieval algorithm  
95 using P- and L-band SAR observations, 2016 IEEE International Geoscience and Remote Sensing  
96 Symposium (IGARSS), 3672–3675, <https://doi.org/10.1109/IGARSS.2016.7729951>, 2016.
- 97 Chen, R. H., Tabatabaenejad, A., and Moghaddam, M.: Retrieval of permafrost active layer properties using P-  
98 band airmoss and L-band UAVSAR data, 2017 IEEE International Geoscience and Remote Sensing  
99 Symposium (IGARSS), 1415–1418, <https://doi.org/10.1109/IGARSS.2017.8127230>, 2017.
- 00 Chen, R. H., Tabatabaenejad, A., and Moghaddam, M.: P-Band Radar Retrieval of Permafrost Active Layer  
01 Properties: Time-Series Approach and Validation with In-Situ Observations, IGARSS 2018 - 2018 IEEE  
02 International Geoscience and Remote Sensing Symposium, 6777–6779,  
03 <https://doi.org/10.1109/IGARSS.2018.8518179>, 2018.
- 04 Chen, R. H., Tabatabaenejad, A., and Moghaddam, M.: ABoVE: Active Layer and Soil Moisture Properties  
05 from AirMOSS P-band SAR in Alaska, ORNL DAAC, <https://doi.org/10.3334/ORNLDAAAC/1657>, 2019a.
- 06 Chen, R. H., Bakian-Dogaheh, K., Tabatabaenejad, A., and Moghaddam, M.: Modeling and Retrieving Soil  
07 Moisture and Organic Matter Profiles in the Active Layer of Permafrost Soils From P-Band Radar  
08 Observations, IGARSS 2019 - 2019 IEEE International Geoscience and Remote Sensing Symposium,  
09 10095–10098, <https://doi.org/10.1109/IGARSS.2019.8899802>, 2019b.
- 10 Chen, R. H., Tabatabaenejad, A., and Moghaddam, M.: Retrieval of Permafrost Active Layer Properties Using  
11 Time-Series P-Band Radar Observations, *IEEE Trans. Geosci. Remote Sens.*, 57, 6037–6054,  
12 <https://doi.org/10.1109/TGRS.2019.2903935>, 2019c.

- 13 Chen, R. H., Michaelides, R. J., Sullivan, T. D., Parsekian, A. D., Zebker, H. A., Moghaddam, M., and Schaefer,  
14 K. M.: Joint Retrieval of Soil Moisture and Permafrost Active Layer Thickness Using L-Band Insar and P-  
15 Band Polsar, IGARSS 2020 - 2020 IEEE International Geoscience and Remote Sensing Symposium, 4606–  
16 4609, <https://doi.org/10.1109/IGARSS39084.2020.9324660>, 2020a.
- 17 Chen, R. H., Pinto, N., Duan, X., Tabatabaenejad, A., and Moghaddam, M.: Mapping Tree Canopy Cover and  
18 Canopy Height with L-Band SAR Using LiDAR Data and Random Forests, IGARSS 2020 - 2020 IEEE  
19 International Geoscience and Remote Sensing Symposium, 4136–4139,  
20 <https://doi.org/10.1109/IGARSS39084.2020.9323738>, 2020b.
- 21 Chen, R. H., Michaelides, R. J., Sullivan, T. D., Parsekian, A. D., Zebker, H. A., Moghaddam, M., & Schaefer,  
22 K. M. (2021a). Joint retrieval of soil moisture and activere layer thickness in the northern circumpolar  
23 permafrost region using l-band InSAR and p-band polsar. *Earth and Space Science*.
- 24 Chen, Richard H., Roger J. Michaelides, Yuhuan Zhao, Lingcao Huang, Elizabeth Wig, Taylor D. Sullivan,  
25 Andrew D. Parsekian, Howard A. Zebker, Mahta Moghaddam, and Kevin M. Schaefer. "Permafrost  
26 Dynamics Observatory: Retrieval of Active Layer Thickness and Soil Moisture from Airborne Insar and  
27 Polsar Data." In *2021 IEEE International Geoscience and Remote Sensing Symposium IGARSS*, pp. 1444-  
28 1447. IEEE, 2021b. DOI: [10.1109/IGARSS47720.2021.9554288](https://doi.org/10.1109/IGARSS47720.2021.9554288)
- 29 Colliander, A., Cosh, M. H., Misra, S., Jackson, T. J., Crow, W. T., Powers, J., McNairn, H., Bullock, P., Berg,  
30 A., Magagi, R., Gao, Y., Bindlish, R., Williamson, R., Ramos, I., Latham, B., O'Neill, P., and Yueh, S.:  
31 Comparison of high-resolution airborne soil moisture retrievals to SMAP soil moisture during the SMAP  
32 validation experiment 2016 (SMAPVEX16), *Remote Sens. Environ.*, 227, 137–150,  
33 <https://doi.org/10.1016/j.rse.2019.04.004>, 2019.
- 34 Cooley, S. W., Smith, L. C., Stepan, L., and Mascaro, J.: Tracking Dynamic Northern Surface Water Changes  
35 with High-Frequency Planet CubeSat Imagery, *Remote Sens.*, 9, 1306, <https://doi.org/10.3390/rs9121306>,  
36 2017.
- 37 Crasto, N., Hopkinson, C., Forbes, D. L., Lesack, L., Marsh, P., Spooner, I., and van der Sanden, J. J.: A LiDAR-  
38 based decision-tree classification of open water surfaces in an Arctic delta, *Remote Sens. Environ.*, 164, 90–  
39 102, <https://doi.org/10.1016/j.rse.2015.04.011>, 2015.
- 40 Danby, R.: A Muniscale Study of Tree-Line Dynamics in Southwestern Yukon, *Arctic*, 56, 427–429, 2003.
- 41 Danby, R. K., Williams, A., and Hik, D. S.: Fifty Years of Science at the Kluane Lake Research Station, *Arctic*,  
42 67, iii–viii, <https://doi.org/10.14430/arctic4398>, 2014.
- 43 Davey, C. A., Redmond, K. T., and Simeral, D. B.: *Weather and Climate Inventory National Park Service*  
44 *Southwest Alaska Network, National Park Service, Fort Collins, Colorado, 2007.*
- 45 Davidson, S. J., Santos, M. J., Sloan, V. L., Watts, J. D., Phoenix, G. K., Oechel, W. C., and Zona, D.: Mapping  
46 Arctic Tundra Vegetation Communities Using Field Spectroscopy and Multispectral Satellite Data in North  
47 Alaska, USA, *Remote Sens.*, 8, 978, <https://doi.org/10.3390/rs8120978>, 2016.
- 48 Davidson, S. J., Santos, M. J., Sloan, V. L., Reuss-Schmidt, K., Phoenix, G. K., Oechel, W. C., and Zona, D.:  
49 Upscaling CH<sub>4</sub> Fluxes Using High-Resolution Imagery in Arctic Tundra Ecosystems, *Remote Sens.*, 9, 1227,  
50 <https://doi.org/10.3390/rs9121227>, 2017.
- 51 Dengel, S. and Torn, M.: NGEE Arctic CO<sub>2</sub>, CH<sub>4</sub> and Energy Eddy-Covariance (EC) Flux Tower Auxiliary  
52 Measurements, Council Road Mile Marker 71, Seward Peninsula, Alaska, 2017 - Ongoing,  
53 <https://doi.org/10.5440/1526749>, 2020.
- 54 Djamai, N., Magagi, R., Goïta, K., Hosseini, M., Cosh, M.H., Berg, A. and Toth, B., 2015. Evaluation of SMOS  
55 soil moisture products over the CanEx-SM10 area. *Journal of hydrology*, 520, pp.254-267.  
56 <https://doi.org/10.1016/j.jhydrol.2014.11.026>
- 57 Douglas, T.A., Jorgenson, M.T., Brown, D.N., Hiemstra, C.A., Liljedahl, A.K., Downer, C., Pradhan, N.,  
58 Marchenko, S., Campbell, S., Senseman, G. and Olson, K., 2016. *Addressing the Impacts of Climate Change*

- 59 *on US Army Alaska with Decision Support Tools Developed Through Field Work and Modeling*. US Army  
60 Cold Regions Research and Engineering Laboratory Fort Wainwright United States.  
61 <https://apps.dtic.mil/sti/pdfs/AD1030958.pdf>
- 62 Douglas, T. A.: ABoVE: Soil Active Layer Thaw Depths at CRREL sites near Fairbanks, Alaska, 2014-2018,  
63 ORNL DAAC, <https://doi.org/10.3334/ORN LDAAC/1701>, 2019.
- 64 Douglas, T. A., Hiemstra, C. A., and Barker, A. J.: ABoVE: End of Season Snow Depth at CRREL sites near  
65 Fairbanks, Alaska, 2014-2019, ORNL DAAC, <https://doi.org/10.3334/ORN LDAAC/1702>, 2019.
- 66 Douglas, T. A., Turetsky, M. R., and Koven, C. D.: Increased rainfall stimulates permafrost thaw across a variety  
67 of Interior Alaskan boreal ecosystems, *Npj Clim. Atmospheric Sci.*, 3, 1–7, <https://doi.org/10.1038/s41612-020-0130-4>, 2020.
- 68
- 69 Douglas, T. A., Hiemstra, C. A., Anderson, J. E., Barbato, R. A., Bjella, K. L., Deeb, E. J., Gelvin, A. B., Nelsen,  
70 P. E., Newman, S. D., Saari, S. P., and Wagner, A. M.: Recent degradation of Interior Alaska permafrost  
71 mapped with ground surveys, geophysics, deep drilling, and repeat airborne LiDAR, *Cryosphere Discuss.*, 1–  
72 39, <https://doi.org/10.5194/tc-2021-47>, 2021.
- 73 Du, J., Kimball, J. S., and Moghaddam, M.: Theoretical Modeling and Analysis of L- and P-band Radar  
74 Backscatter Sensitivity to Soil Active Layer Dielectric Variations, *Remote Sens.*, 7, 9450–9472,  
75 <https://doi.org/10.3390/rs70709450>, 2015.
- 76 Engstrom, R., Hope, A., Kwon, H., Stow, D., and Zamolodchikov, D.: Spatial distribution of near surface soil  
77 moisture and its relationship to microtopography in the Alaskan Arctic coastal plain, *Hydrol. Res.*, 36, 219–  
78 234, <https://doi.org/10.2166/nh.2005.0016>, 2005.
- 79 Euskirchen, E. S. and Edgar, C.: FLUXNET-CH4 US-BZB Bonanza Creek Thermokarst Bog, ,  
80 <https://doi.org/10.18140/FLX/1669668>, 2014a.
- 81 Euskirchen, E. S. and Edgar, C.: FLUXNET-CH4 US-BZF Bonanza Creek Rich Fen, ,  
82 <https://doi.org/10.18140/FLX/1669669>, 2014b.
- 83 Euskirchen, E. S. and Edgar, C.: FLUXNET-CH4 US-BZS Bonanza Creek Black Spruce, ,  
84 <https://doi.org/10.18140/FLX/1669670>, 2015.
- 85 Euskirchen, E. S., Bret-Harte, M. S., Scott, G. J., Edgar, C., and Shaver, G. R.: Seasonal patterns of carbon  
86 dioxide and water fluxes in three representative tundra ecosystems in northern Alaska, *Ecosphere*, 3, art4,  
87 <https://doi.org/10.1890/ES11-00202.1>, 2012.
- 88 Fayne, J. V., Smith, L. C., Pitcher, L. H., Kyzivat, E. D., Cooley, S. W., Cooper, M. G., Denbina, M. W., Chen,  
89 A. C., Chen, C. W., and Pavelsky, T. M.: Airborne observations of arctic-boreal water surface elevations  
90 from AirSWOT Ka-Band InSAR and LVIS LiDAR, *Environ. Res. Lett.*, 15, 105005,  
91 <https://doi.org/10.1088/1748-9326/abadcc>, 2020.
- 92 French, N. H. F., Bourgeau-Chavez, L. L., and Chapman, B.: Wetland monitoring in high northern latitudes for  
93 carbon and habitat assessment using synthetic aperture radar, in: *AGU Fall Meeting Abstracts*, H31N-1951,  
94 2019.
- 95 French, N. H. F., Graham, J. A., Bourgeau-Chavez, L. L., and Whitman, E.: ABoVE: Burn Severity of Soil  
96 Organic Matter, Northwest Territories, Canada, 2014-2015, ORNL DAAC,  
97 <https://doi.org/10.3334/ORN LDAAC/1694>, 2020a.
- 98 French, N. H. F., Graham, J., Whitman, E., Bourgeau-Chavez, L. L., French, N. H. F., Graham, J., Whitman, E.,  
99 and Bourgeau-Chavez, L. L.: Quantifying surface severity of the 2014 and 2015 fires in the Great Slave Lake  
00 area of Canada, *Int. J. Wildland Fire*, 29, 892–906, <https://doi.org/10.1071/WF20008>, 2020b.
- 01 Frost, G. V., Loehman, R. A., Nelson, P. R., and Paradis, D. P.: ABoVE: Vegetation Composition across Fire  
02 History Gradients on the Y-K Delta, Alaska, ORNL DAAC, <https://doi.org/10.3334/ORN LDAAC/1772>,  
03 2020.

- 04 Gamon, J. A., Huemmrich, K. F., Peddle, D. R., Chen, J., Fuentes, D., Hall, F. G., Kimball, J. S., Goetz, S., Gu,  
05 J., McDonald, K. C., Miller, J. R., Moghaddam, M., Rahman, A. F., Roujean, J.-L., Smith, E. A., Walthall, C.  
06 L., Zarco-Tejada, P., Hu, B., Fernandes, R., and Cihlar, J.: Remote sensing in BOREAS: Lessons learned,  
07 *Remote Sens. Environ.*, 89, 139–162, <https://doi.org/10.1016/j.rse.2003.08.017>, 2004.
- 08 Goetz, SJ, Miller, CE, Griffith, PC, et al., An overview of NASA’s Arctic Boreal Vulnerability Experiment  
09 (ABoVE): An integrated research campaign to assess ecosystem vulnerability and its implications within the  
10 Arctic and boreal domain, *Environmental Research Letters* (ABoVE Special Collection), Manuscript ERL-  
11 112259, submitted, 2021
- 12 Greaves, H. E., Vierling, L., Eitel, J., Boelman, N., Magney, T., Prager, C., and Griffin, K.: High-Resolution  
13 Shrub Biomass and Uncertainty Maps, Toolik Lake Area, Alaska, 2013, ORNL DAAC,  
14 <https://doi.org/10.3334/ORNLDAAC/1573>, 2018.
- 15 Gusmeroli, A., Liu, L., Schaefer, K., Zhang, T., Schaefer, T., and Grosse, G.: Active Layer Stratigraphy and  
16 Organic Layer Thickness at a Thermokarst Site in Arctic Alaska Identified Using Ground Penetrating Radar,  
17 *Arct. Antarct. Alp. Res.*, 47, 195–202, <https://doi.org/10.1657/AAAR00C-13-301>, 2015.
- 18 He, J., Loboda, T. V., Jenkins, L., and Chen, D.: Mapping fractional cover of major fuel type components across  
19 Alaskan tundra, *Remote Sens. Environ.*, 232, 111324, <https://doi.org/10.1016/j.rse.2019.111324>, 2019.
- 20 He, J., Loboda, T. V., Jenkins, L., and Chen, D.: ABoVE: Distribution Maps of Wildland Fire Fuel Components  
21 across Alaskan Tundra, 2015, ORNL DAAC, <https://doi.org/10.3334/ORNLDAAC/1761>, 2020.
- 22 He, J., Chen, D., Jenkins, L., and Loboda, T. V.: Impacts of wildfire and landscape factors on organic soil  
23 properties in Arctic tussock tundra. *Environmental Research Letters.*, *Environ. Res. Lett.*, in review, n.d.  
24
- 25 Hensley, S., Oveisgharan, S., Saatchi, S., Simard, M., Ahmed, R. and Haddad, Z., 2014. An error model  
26 for biomass estimates derived from polarimetric radar backscatter. *IEEE Transactions on*  
27 *Geoscience and Remote Sensing*, 52(7), pp.4065-4082.
- 28 Hensley, S., Lou, Y., Michel, T., Muellerschoen, R., Hawkins, B., Lavalley, M., Pinto, N., Reigber, A.  
29 and Pardini, M., 2016, July. UAVSAR PolInSAR and tomographic experiments in Germany. In  
30 *Geoscience and Remote Sensing Symposium (IGARSS), 2016 IEEE International* (pp. 7517-7520).  
31 IEEE.
- 32 Hensley, S., Chapman, B., Lavalley, M., Hawkins, B., Riel, B., Michel, T., Muellerschoen, R., Lou, Y., and  
33 Simard, M.: UAVSAR L-Band and P-Band Tomographic Experiments in Boreal Forests, IGARSS 2018 -  
34 2018 IEEE International Geoscience and Remote Sensing Symposium, 8679–8682,  
35 <https://doi.org/10.1109/IGARSS.2018.8518784>, 2018.
- 36 Hensley, S., Ahmed, R., Chapman, B., Hawkins, B., Lavalley, M., Pinto, N., Pardini, M., Papathanassiou, K.,  
37 Siqueria, P., and Treuhaft, R.: Boreal Forest Radar Tomography at P, L and S-Bands at Berms and Delta  
38 Junction, IGARSS 2020 - 2020 IEEE International Geoscience and Remote Sensing Symposium, 96–99,  
39 <https://doi.org/10.1109/IGARSS39084.2020.9323337>, 2020.
- 40 Higuera, P. E., Barnes, J., Chipman, M. L., Urban, M., and Hu, F. S.: The Burning Tundra: A Look Back at the  
41 Last 6,000 Years of Fire in the Noatak National Preserve, Northwestern Alaska (U.S. National Park Service),  
42 *Alsk. Park Sci.*, 10, 36–41, 2011.
- 43 Hinzman, L. D., Deal, C. J., McGuire, A. D., Mernild, S. H., Polyakov, I. V., and Walsh, J. E.: Trajectory of the  
44 Arctic as an integrated system, *Ecol. Appl.*, 23, 1837–1868, <https://doi.org/10.1890/11-1498.1>, 2013.
- 45 Hogg, E. H., Michaelian, M., Hook, T. I., and Undershultz, M. E.: Recent climatic drying leads to age-  
46 independent growth reductions of white spruce stands in western Canada, *Glob. Change Biol.*, 23, 5297–  
47 5308, <https://doi.org/10.1111/gcb.13795>, 2017.

- 48 Hogg, E. H. (Ted) H. H., Brandt, J. P. B. P., and Michaelian, M. M.: Impacts of a regional drought on the  
49 productivity, dieback, and biomass of western Canadian aspen forests, *Can. J. For. Res.*,  
50 <https://doi.org/10.1139/X08-001>, 2008.
- 51 Holloway, J. E., Lewkowicz, A. G., Douglas, T. A., Li, X., Turetsky, M. R., Baltzer, J. L., and Jin, H.: Impact of  
52 wildfire on permafrost landscapes: A review of recent advances and future prospects, *Permafrost. Periglac.*  
53 *Process.*, 31, 371–382, <https://doi.org/10.1002/ppp.2048>, 2020.
- 54 Hopkinson, C., Crasto, N., Marsh, P., Forbes, D., and Lesack, L.: Investigating the spatial distribution of water  
55 levels in the Mackenzie Delta using airborne LiDAR, *Hydrol. Process.*, 25, 2995–3011,  
56 <https://doi.org/10.1002/hyp.8167>, 2011.
- 57 Horn, R., Jaeger, M., Keller, M., Limbach, M., Nottensteiner, A., Pardini, M., Reigber, A., and Scheiber, R.: F-  
58 SAR - recent upgrades and campaign activities, in: 2017 18th International Radar Symposium (IRS), 2017  
59 18th International Radar Symposium (IRS), 1–10, <https://doi.org/10.23919/IRS.2017.8008092>, 2017.
- 60 Hoy, E. E., Griffith, P., Miller, C. E., and Team, A. S.: ABoVE: Directory of Field Sites Associated with 2017  
61 ABoVE Airborne Campaign, ORNL DAAC, <https://doi.org/10.3334/ORNLDAAAC/1582>, 2018.
- 62 Hu, F. S., Higuera, P. E., Walsh, J. E., Chapman, W. L., Duffy, P. A., Brubaker, L. B., and Chipman, M. L.:  
63 Tundra burning in Alaska: Linkages to climatic change and sea ice retreat, *J. Geophys. Res. Biogeosciences*,  
64 115, <https://doi.org/10.1029/2009JG001270>, 2010.
- 65 Iwahana, G., Harada, K., Uchida, M., Tsuyuzaki, S., Saito, K., Narita, K., Kushida, K., and Hinzman, L. D.:  
66 Geomorphological and geochemistry changes in permafrost after the 2002 tundra wildfire in Kougarak,  
67 Seward Peninsula, Alaska, *J. Geophys. Res. Earth Surf.*, 121, 1697–1715,  
68 <https://doi.org/10.1002/2016JF003921>, 2016a.
- 69 Iwahana, G., Uchida, M., Liu, L., Gong, W., Meyer, F. J., Guritz, R., Yamanokuchi, T., and Hinzman, L.: InSAR  
70 Detection and Field Evidence for Thermokarst after a Tundra Wildfire, Using ALOS-PALSAR, *Remote*  
71 *Sens.*, 8, 218, <https://doi.org/10.3390/rs8030218>, 2016b.
- 72 Jafarov, E. E., Parsekian, A. D., Schaefer, K., Liu, L., Chen, A. C., Panda, S. K., and Zhang, T.: Estimating active  
73 layer thickness and volumetric water content from ground penetrating radar measurements in Barrow,  
74 Alaska, *Geosci. Data J.*, 4, 72–79, <https://doi.org/10.1002/gdj3.49>, 2017.
- 75 Jenkins, L. K., Bourgeau-Chavez, L. L., French, N. H. F., Loboda, T. V., and Thelen, B. J.: Development of  
76 Methods for Detection and Monitoring of Fire Disturbance in the Alaskan Tundra Using a Two-Decade Long  
77 Record of Synthetic Aperture Radar Satellite Images, *Remote Sens.*, 6, 6347–6364,  
78 <https://doi.org/10.3390/rs6076347>, 2014.
- 79 Johnston, C. E., Ewing, S. A., Harden, J. W., Varner, R. K., Wickland, K. P., Koch, J. C., Fuller, C. C., Manies,  
80 K., and Jorgenson, M. T.: Effect of permafrost thaw on CO<sub>2</sub> and CH<sub>4</sub> exchange in a western Alaska peatland  
81 chronosequence, *Environ. Res. Lett.*, 9, 085004, <https://doi.org/10.1088/1748-9326/9/8/085004>, 2014.
- 82 Jones, B. M., Kolden, C. A., Jandt, R., Abatzoglou, J. T., Urban, F., and Arp, C. D.: Fire Behavior, Weather, and  
83 Burn Severity of the 2007 Anaktuvuk River Tundra Fire, North Slope, Alaska, *Arct. Antarct. Alp. Res.*, 41,  
84 309–316, <https://doi.org/10.1657/1938-4246-41.3.309>, 2009.
- 85 Jones, B. M., Grosse, G., Arp, C. D., Miller, E., Liu, L., Hayes, D. J., and Larsen, C. F.: Recent Arctic tundra fire  
86 initiates widespread thermokarst development, *Sci. Rep.*, 5, 15865, <https://doi.org/10.1038/srep15865>, 2015.
- 87 Jones, M. C., Harden, J., O'Donnell, J., Manies, K., Jorgenson, T., Treat, C., and Ewing, S.: Rapid carbon loss  
88 and slow recovery following permafrost thaw in boreal peatlands, *Glob. Change Biol.*, 23, 1109–1127,  
89 <https://doi.org/10.1111/gcb.13403>, 2017.
- 90 Jorgenson, M. T., Harden, J., Kanevskiy, M., O'Donnell, J., Wickland, K., Ewing, S., Manies, K., Zhuang, Q.,  
91 Shur, Y., Striegl, R., and Koch, J.: Reorganization of vegetation, hydrology and soil carbon after permafrost  
92 degradation across heterogeneous boreal landscapes, *Environ. Res. Lett.*, 8, 035017,  
93 <https://doi.org/10.1088/1748-9326/8/3/035017>, 2013.

- 94 Karion, A., Sweeney, C., Miller, J. B., Andrews, A. E., Commane, R., Dinardo, S., Henderson, J. M., Lindaas, J.,  
95 Lin, J. C., Luus, K. A., Newberger, T., Tans, P., Wofsy, S. C., Wolter, S., and Miller, C. E.: Investigating  
96 Alaskan methane and carbon dioxide fluxes using measurements from the CARVE tower, *Atmospheric*  
97 *Chem. Phys.*, 16, 5383–5398, <https://doi.org/10.5194/acp-16-5383-2016>, 2016.
- 98 Kobayashi, H., Hiroki, I., and Suzuki, R.: AmeriFlux US-Prr Poker Flat Research Range Black Spruce Forest,  
99 Ver. 3-5, <https://doi.org/10.17190/AMF/1246153>, 2019.
- 00 Kokelj, S. V., Lacelle, D., Lantz, T. C., Tunnicliffe, J., Malone, L., Clark, I. D., and Chin, K. S.: Thawing of  
01 massive ground ice in mega slumps drives increases in stream sediment and solute flux across a range of  
02 watershed scales, *J. Geophys. Res. Earth Surf.*, 118, 681–692, <https://doi.org/10.1002/jgrf.20063>, 2013.
- 03 Kokelj, S. V., Tunnicliffe, J., Lacelle, D., Lantz, T. C., Chin, K. S., and Fraser, R.: Increased precipitation drives  
04 mega slump development and destabilization of ice-rich permafrost terrain, northwestern Canada, *Glob.*  
05 *Planet. Change*, 129, 56–68, <https://doi.org/10.1016/j.gloplacha.2015.02.008>, 2015.
- 06 Kokelj, S. V., Lantz, T. C., Tunnicliffe, J., Segal, R., and Lacelle, D.: Climate-driven thaw of permafrost  
07 preserved glacial landscapes, northwestern Canada, *Geology*, 45, 371–374, <https://doi.org/10.1130/G38626.1>,  
08 2017.
- 09 Kyzivat, E. D., Smith, L. C., Pitcher, L. H., Fayne, J. V., Cooley, S. W., Cooper, M. G., Topp, S. N., Langhorst,  
10 T., Harlan, M. E., Horvat, C., Gleason, C. J., and Pavelsky, T. M.: A High-Resolution Airborne Color-  
11 Infrared Camera Water Mask for the NASA ABoVE Campaign, *Remote Sens.*, 11, 2163,  
12 <https://doi.org/10.3390/rs11182163>, 2019.
- 13 Kyzivat, E. D., Smith, L. C., Pitcher, L. H., Fayne, J. V., Cooley, S. W., Cooper, M. G., Topp, S., Langhorst, T.,  
14 Harlan, M. E., Gleason, C. J., and Pavelsky, T. M.: ABoVE: AirSWOT Water Masks from Color-Infrared  
15 Imagery over Alaska and Canada, 2017, ORNL DAAC, <https://doi.org/10.3334/ORNLDAAC/1707>, 2020.
- 16 Lafleur, P. M. and Humphreys, E. R.: Tundra shrub effects on growing season energy and carbon dioxide  
17 exchange, *Environ. Res. Lett.*, 13, 055001, <https://doi.org/10.1088/1748-9326/aab863>, 2018.
- 18 Lantz, T. C. and Turner, K. W.: Changes in lake area in response to thermokarst processes and climate in Old  
19 Crow Flats, Yukon, *J. Geophys. Res. Biogeosciences*, 120, 513–524, <https://doi.org/10.1002/2014JG002744>,  
20 2015.
- 21 Laval, M., Hawkins, B., and Hensley, S.: Tomographic imaging with UAVSAR: Current status and new results  
22 from the 2016 AfriSAR campaign, 2017 IEEE International Geoscience and Remote Sensing Symposium  
23 (IGARSS), 2485–2488, <https://doi.org/10.1109/IGARSS.2017.8127498>, 2017.
- 24 Le Toan, T., Quegan, S., Davidson, M. W. J., Balzter, H., Pailou, P., Papathanassiou, K., Plummer, S., Rocca, F.,  
25 Saatchi, S., Shugart, H., and Ulander, L.: The BIOMASS mission: Mapping global forest biomass to better  
26 understand the terrestrial carbon cycle, *Remote Sens. Environ.*, 115, 2850–2860,  
27 <https://doi.org/10.1016/j.rse.2011.03.020>, 2011.
- 28 Liljedahl, A., Hinzman, L., Busey, R., and Yoshikawa, K.: Physical short-term changes after a tussock tundra  
29 fire, Seward Peninsula, Alaska, *J. Geophys. Res. Earth Surf.*, 112, <https://doi.org/10.1029/2006JF000554>,  
30 2007.
- 31 Lindsay, C., Zhu, J., Miller, A. E., Kirchner, P., and Wilson, T. L.: Deriving Snow Cover Metrics for Alaska  
32 from MODIS, *Remote Sens.*, 7, 12961–12985, <https://doi.org/10.3390/rs71012961>, 2015.
- 33 Lipovsky, P. S.: Summary of Yukon Geological Survey permafrost monitoring network results, 2008-2013, in:  
34 Yukon Exploration and Geology 2014, edited by: MacFarlane, K. E., Nordling, M. G., and Sack, P. J., Yukon  
35 Geological Survey, 113–122, 2015.
- 36 Liu, L., Schaefer, K., Zhang, T., and Wahr, J.: Estimating 1992–2000 average active layer thickness on the  
37 Alaskan North Slope from remotely sensed surface subsidence, *J. Geophys. Res. Earth Surf.*, 117,  
38 <https://doi.org/10.1029/2011JF002041>, 2012.



- 39 Liu, L., Jafarov, E. E., Schaefer, K. M., Jones, B. M., Zebker, H. A., Williams, C. A., Rogan, J., and Zhang, T.:  
40 InSAR detects increase in surface subsidence caused by an Arctic tundra fire, *Geophys. Res. Lett.*, 41, 3906–  
41 3913, <https://doi.org/10.1002/2014GL060533>, 2014.
- 42 Liu, L., Schaefer, K., Chen, A. C., Gusmeroli, A., Jafarov, E. E., Panda, S. K., Parsekian, A. D., Schaefer, T.,  
43 Zebker, H. A., and Zhang, T.: Pre-ABoVE: Remotely Sensed Active Layer Thickness, Barrow, Alaska, 2006–  
44 2011, ORNL DAAC, <https://doi.org/10.3334/ORNLDAAC/1266>, 2015a.
- 45 Liu, L., Schaefer, K., Chen, A. C., Gusmeroli, A., Jafarov, E. E., Panda, S. K., Parsekian, A. D., Schaefer, T.,  
46 Zebker, H. A., and Zhang, T.: Pre-ABoVE: Remotely Sensed Active Layer Thickness, Prudhoe Bay, Alaska,  
47 1992–2000, ORNL DAAC, <https://doi.org/10.3334/ORNLDAAC/1267>, 2015b.
- 48 Loboda, T. V., French, N. H. F., Hight-Harf, C., Jenkins, L., and Miller, M. E.: Mapping fire extent and burn  
49 severity in Alaskan tussock tundra: An analysis of the spectral response of tundra vegetation to wildland fire,  
50 *Remote Sens. Environ.*, 134, 194–209, <https://doi.org/10.1016/j.rse.2013.03.003>, 2013.
- 51 Loboda, T. V., Chen, D., He, J., and Baer, A.: ABoVE: Unburned and Burned Sites and Alaskan Tundra, ORNL  
52 DAAC, Submitted 1 May 2021, n.d.
- 53 Lopez-Sanchez, J. M., Ballester-Berman, J. D., Vicente-Guijalba, F., Cloude, S. R., McNairn, H., Shang, J.,  
54 Skriver, H., Jagdhuber, T., Hajnsek, I., Pottier, E., Marechal, C., Hubert-Moy, L., Corgne, S., Wdowski, S.,  
55 Touzi, R., Gosselin, G., Brooks, R., Yamaguchi, Y., and Singh, G.: Agriculture and Wetland Applications,  
56 in: *Polarimetric Synthetic Aperture Radar: Principles and Application*, vol. 25, edited by: Hajnsek, I. and  
57 Desnos, Y.-L., Springer International Publishing, Cham, 119–178, [https://doi.org/10.1007/978-3-030-56504-  
58 6\\_3](https://doi.org/10.1007/978-3-030-56504-6_3), 2021.
- 59 Lou, Y., Shimada, J. G., Michel, T. R., Muellerschoen, R. J., Zheng, Y., and Moghaddam, M.: Pre-ABoVE: L1  
60 S-0 Polarimetric Data from AirMOSS P-band SAR, Alaska, 2014–2015, ORNL DAAC,  
61 <https://doi.org/10.3334/ORNLDAAC/1678>, 2019.
- 62 Mack, M. C., Bret-Harte, M. S., Hollingsworth, T. N., Jandt, R. R., Schuur, E. A. G., Shaver, G. R., and Verbyla,  
63 D. L.: Carbon loss from an unprecedented Arctic tundra wildfire, *Nature*, 475, 489–492,  
64 <https://doi.org/10.1038/nature10283>, 2011.
- 65 Magagi, R., Berg, A. A., Goita, K., Belair, S., Jackson, T. J., Toth, B., Walker, A., McNairn, H., O'Neill, P. E.,  
66 Moghaddam, M., Gherboudj, I., Colliander, A., Cosh, M. H., Burgin, M., Fisher, J. B., Kim, S.-B.,  
67 Mladenova, I., Djamai, N., Rousseau, L.-P. B., Belanger, J., Shang, J., and Merzouki, A.: Canadian  
68 Experiment for Soil Moisture in 2010 (CanEx-SM10): Overview and Preliminary Results, *IEEE Trans.*  
69 *Geosci. Remote Sens.*, 51, 347–363, <https://doi.org/10.1109/TGRS.2012.2198920>, 2013.
- 70 Malone, T., Liang, J., and Packee, E. C.: Cooperative Alaska Forest Inventory, Gen Tech Rep PNW-GTR-785  
71 Portland US Dep. Agric. For. Serv. Pac. Northwest Res. Stn. 42 P, 785, [https://doi.org/10.2737/PNW-GTR-  
72 785](https://doi.org/10.2737/PNW-GTR-<br/>72 785), 2009.
- 73 Marsh, P., Russell, M., Pohl, S., Haywood, H., and Onclin, C.: Changes in thaw lake drainage in the Western  
74 Canadian Arctic from 1950 to 2000, *Hydrol. Process.*, 23, 145–158, <https://doi.org/10.1002/hyp.7179>, 2009a.
- 75 Marsh, P., Lesack, L., Hicks, F., Roberts, A., Hopkinson, C., Solomon, S., Forbes, D., Russell, M., and Haywood,  
76 H.: Hydrology of the Mackenzie Delta: off-channel water storage and delta interaction with the Beaufort Sea,  
77 2009b.
- 78 Marsh, P., Bartlett, P., MacKay, M., Pohl, S., and Lantz, T.: Snowmelt energetics at a shrub tundra site in the  
79 western Canadian Arctic, *Hydrol. Process.*, 24, 3603–3620, <https://doi.org/10.1002/hyp.7786>, 2010.
- 80 McCune, B., Arup, U., Breuss, O., Di Meglio, J., Esslinger, T. L., Magain, N., Miadlikowska, J., Miller, A. E.,  
81 Muggia, L., Nelson, P. R., Rosentreter, R., Schultz, M., Sheard, J. W., Tønsberg, T., and Walton, J.:  
82 Biodiversity and ecology of lichens of Katmai and Lake Clark National Parks and Preserves, Alaska,  
83 *Mycosphere*, 9, 859–930, 2018.

- 84 McGuire, A. D., Anderson, L. G., Christensen, T. R., Dallimore, S., Guo, L., Hayes, D. J., Heimann, M.,  
85 Lorenson, T. D., Macdonald, R. W., and Roulet, N.: Sensitivity of the carbon cycle in the Arctic to climate  
86 change, *Ecol. Monogr.*, 79, 523–555, <https://doi.org/10.1890/08-2025.1>, 2009.
- 87 Meddens, A. J. H., Vierling, L. A., Eitel, J. U. H., Jennewein, J. S., White, J. C., and Wulder, M. A.: Developing  
88 5 m resolution canopy height and digital terrain models from WorldView and ArcticDEM data, *Remote Sens.*  
89 *Environ.*, 218, 174–188, <https://doi.org/10.1016/j.rse.2018.09.010>, 2018.
- 90 Mehra, R. and Ramanujam, V. M.: L S Band Airborne SAR Data Products Calibration, in: 2019 URSI Asia-  
91 Pacific Radio Science Conference (AP-RASC), 2019 URSI Asia-Pacific Radio Science Conference (AP-  
92 RASC), 1–1, <https://doi.org/10.23919/URSIAP-RASC.2019.8738681>, 2019.
- 93 Meyer, G., Humphreys, E. R., Melton, J. R., Cannon, A. J., and Lafleur, P. M.: Simulating shrubs and their  
94 energy and carbon dioxide fluxes in Canada’s Low Arctic with the Canadian Land Surface Scheme Including  
95 biogeochemical Cycles (CLASSIC), *Biogeosciences Discuss.*, 1–34, <https://doi.org/10.5194/bg-2020-458>,  
96 2020.
- 97 Michaelian, M., Hogg, E. H., Hall, R. J., and Arsenault, E.: Massive mortality of aspen following severe drought  
98 along the southern edge of the Canadian boreal forest, *Glob. Change Biol.*, 17, 2084–2094,  
99 <https://doi.org/10.1111/j.1365-2486.2010.02357.x>, 2011.
- 00 Michaelides, R. J., Schaefer, K., Zebker, H. A., Parsekian, A., Liu, L., Chen, J., Natali, S., Ludwig, S., and  
01 Schaefer, S. R.: Inference of the impact of wildfire on permafrost and active layer thickness in a  
02 discontinuous permafrost region using the remotely sensed active layer thickness (ReSALT) algorithm,  
03 *Environ. Res. Lett.*, 14, 035007, <https://doi.org/10.1088/1748-9326/aa932>, 2019.
- 04 Michaelides, R. J., Chen, R. H., Zhao, Y., Schaefer, K., Parsekian, A. D., Sullivan, T., et al. (2021).  
05 Permafrost Dynamics Observatory—part I: Postprocessing and calibration methods of UAVSAR L-  
06 band InSAR data for seasonal subsidence estimation. *Earth and Space Science*, 8, e2020EA001630.  
07 <https://doi.org/10.1029/2020EA001630>
- 08 Miller, C. E., Griffith, P. C., Goetz, S. J., Hoy, E. E., Pinto, N., McCubbin, I. B., Thorpe, A. K., Hofton, M.,  
09 Hodkinson, D., Hansen, C., Woods, J., Larson, E., Kasischke, E. S., and Margolis, H. A.: An overview of  
10 ABoVE airborne campaign data acquisitions and science opportunities, *Environ. Res. Lett.*, 14, 080201,  
11 <https://doi.org/10.1088/1748-9326/ab0d44>, 2019.
- 12 Minions, C., Natali, S., Watts, J. D., Ludwig, S., and Risk, D.: ABoVE: Year-Round Soil CO<sub>2</sub> Efflux in Alaskan  
13 Ecosystems, Version 2, ORNL DAAC, <https://doi.org/10.3334/ORNLDAAC/1762>, 2020.
- 14 Minsley, B. J., Abraham, J. D., Smith, B. D., Cannia, J. C., Voss, C. I., Jorgenson, M. T., Walvoord, M. A.,  
15 Wylie, B. K., Anderson, L., Ball, L. B., Deszcz-Pan, M., Wellman, T. P., and Ager, T. A.: Airborne  
16 electromagnetic imaging of discontinuous permafrost, *Geophys. Res. Lett.*, 39,  
17 <https://doi.org/10.1029/2011GL050079>, 2012.
- 18 Moghaddam, M., Tabatabaenejad, A., Chen, R. H., Saatchi, S. S., Jaruwatanadilok, S., Burgin, M., Duan, X.,  
19 and Truong-Loi, M. L.: AirMOSS: L2/3 Volumetric Soil Moisture Profiles Derived From Radar, 2012-2015,  
20 ORNL DAAC, <https://doi.org/10.3334/ORNLDAAC/1418>, 2016.
- 21 Montesano, P. M., Sun, G., Dubayah, R. O., and Ranson, K. J.: Spaceborne potential for examining taiga–tundra  
22 ecotone form and vulnerability, *Biogeosciences*, 13, 3847–3861, <https://doi.org/10.5194/bg-13-3847-2016>,  
23 2016.
- 24 Myers-Smith, I. H., Forbes, B. C., Wilkening, M., Hallinger, M., Lantz, T., Blok, D., Tape, K. D., Macias-Fauria,  
25 M., Sass-Klaassen, U., Lévesque, E., Boudreau, S., Ropars, P., Hermanutz, L., Trant, A., Collier, L. S.,  
26 Weijers, S., Rozema, J., Rayback, S. A., Schmidt, N. M., Schaepman-Strub, G., Wipf, S., Rixen, C., Ménard,  
27 C. B., Venn, S., Goetz, S., Andreu-Hayles, L., Elmendorf, S., Ravolainen, V., Welker, J., Grogan, P., Epstein,

28 H. E., and Hik, D. S.: Shrub expansion in tundra ecosystems: dynamics, impacts and research priorities,  
29 *Environ. Res. Lett.*, 6, 045509, <https://doi.org/10.1088/1748-9326/6/4/045509>, 2011.

30 Natali, S. M., Schuur, E. A. G., Webb, E. E., Pries, C. E. H., and Crummer, K. G.: Permafrost degradation  
31 stimulates carbon loss from experimentally warmed tundra, *Ecology*, 95, 602–608,  
32 <https://doi.org/10.1890/13-0602.1>, 2014.

33 National Research Council: Opportunities to Use Remote Sensing in Understanding Permafrost and Related  
34 Ecological Characteristics: Report of a Workshop, The National Academies Press, Washington, DC, 2014.

35 Oechel, W. C., Vourlitis, G. L., Hastings, S. J., Zulueta, R. C., Hinzman, L., and Kane, D.: Acclimation of  
36 ecosystem CO<sub>2</sub> exchange in the Alaskan Arctic in response to decadal climate warming, *Nature*, 406, 978–  
37 981, <https://doi.org/10.1038/35023137>, 2000.

38 Pan, C. G., Kirchner, P. B., Kimball, J. S., and Du, J.: A Long-Term Passive Microwave Snowoff Record for the  
39 Alaska Region 1988–2016, *Remote Sens.*, 12, 153, <https://doi.org/10.3390/rs12010153>, 2020.

40 Pavelsky, T. M. and Smith, L. C.: Remote sensing of hydrologic recharge in the Peace-Athabasca Delta, Canada,  
41 *Geophys. Res. Lett.*, 35, <https://doi.org/10.1029/2008GL033268>, 2008.

42 Pietroniro, A., Peters, D. L., Yang, D., Fiset, J.-M., Saint-Jean, R., Fortin, V., Leconte, R., Bergeron, J., Siles, G.  
43 L., Trudel, M., Garnaud, C., Matte, P., Smith, L. C., Gleason, C. J., and Pavelsky, T. M.: Canada's  
44 Contributions to the SWOT Mission – Terrestrial Hydrology (SWOT-C TH), *Can. J. Remote Sens.*, 45, 116–  
45 138, <https://doi.org/10.1080/07038992.2019.1581056>, 2019.

46 Pitcher, L. H., Smith, L. C., Pavelsky, T. M., Fayne, J. V., Cooley, S. W., Altenau, E. H., Moller, D. K., and  
47 Arvesen, J.: ABoVE: AirSWOT Radar, Orthomosaic, and Water Masks, Yukon Flats Basin, Alaska, 2015,  
48 ORNL DAAC, <https://doi.org/10.3334/ORNLDAAC/1655>, 2019a.

49 Pitcher, L. H., Pavelsky, T. M., Smith, L. C., Moller, D. K., Altenau, E. H., Allen, G. H., Lion, C., Butman, D.,  
50 Cooley, S. W., Fayne, J. V., and Bertram, M.: AirSWOT InSAR Mapping of Surface Water Elevations and  
51 Hydraulic Gradients Across the Yukon Flats Basin, Alaska, *Water Resour. Res.*, 55, 937–953,  
52 <https://doi.org/10.1029/2018WR023274>, 2019b.

53 Pitcher, L. H., Smith, L. C., Cooley, S. W., Zaino, A., Carlson, R., Pettit, J., Gleason, C. J., Minear, J. T., Fayne,  
54 J. V., Willis, M. J., Hansen, J. S., Easterday, K. J., Harlan, M. E., Langhorst, T., Topp, S. N., Dolan, W.,  
55 Kyzivat, E. D., Pietroniro, A., Marsh, P., Yang, D., Carter, T., Onclin, C., Hosseini, N., Wilcox, E., Moreira,  
56 D., Berge-Nguyen, M., Cretaux, J.-F., and Pavelsky, T. M.: Advancing Field-Based GNSS Surveying for  
57 Validation of Remotely Sensed Water Surface Elevation Products, *Front. Earth Sci.*, 8,  
58 <https://doi.org/10.3389/feart.2020.00278>, 2020.

59 Plaza, C., Pegoraro, E., Bracho, R., Celis, G., Crummer, K. G., Hutchings, J. A., Hicks Pries, C. E., Mauritz, M.,  
60 Natali, S. M., Salmon, V. G., Schädel, C., Webb, E. E., and Schuur, E. A. G.: Direct observation of  
61 permafrost degradation and rapid soil carbon loss in tundra, *Nat. Geosci.*, 12, 627–631,  
62 <https://doi.org/10.1038/s41561-019-0387-6>, 2019.

63 Porter, C., Morin, P., Howat, I., Noh, M.-J., Bates, B., Peterman, K., Keeseey, S., Schlenk, M., Gardiner, J.,  
64 Tomko, K., Willis, M., Kelleher, C., Cloutier, M., Husby, E., Foga, S., Nakamura, H., Platson, M.,  
65 Wethington, M., Williamson, C., Bauer, G., Enos, J., Arnold, G., Kramer, W., Becker, P., Doshi, A.,  
66 D'Souza, C., Cummens, P., Laurier, F., and Bojesen, M.: ArcticDEM,  
67 <https://doi.org/10.7910/DVN/OHHUKH>, 2018.

68 Potter, C.: Ecosystem carbon emissions from 2015 forest fires in interior Alaska, *Carbon Balance Manag.*, 13, 2,  
69 <https://doi.org/10.1186/s13021-017-0090-0>, 2018.

70 Quegan, S., Le Toan, T., Chave, J., Dall, J., Exbrayat, J.-F., Minh, D. H. T., Lomas, M., D'Alessandro, M. M.,  
71 Paillou, P., Papathanassiou, K., Rocca, F., Saatchi, S., Scipal, K., Shugart, H., Smallman, T. L., Soja, M. J.,  
72 Tebaldini, S., Ulander, L., Villard, L., and Williams, M.: The European Space Agency BIOMASS mission:

- 73 Measuring forest above-ground biomass from space, *Remote Sens. Environ.*, 227, 44–60,  
74 <https://doi.org/10.1016/j.rse.2019.03.032>, 2019.
- 75 Quinton, W., Berg, A., Braverman, M., Carpino, O., Chasmer, L., Connon, R., Craig, J., Devoie, É., Hayashi, M.,  
76 Haynes, K., Olefeldt, D., Pietroniro, A., Rezaeehad, F., Schincariol, R., and Sonnentag, O.: A synthesis of  
77 three decades of hydrological research at Scotty Creek, NWT, Canada, *Hydrol. Earth Syst. Sci.*, 23, 2015–  
78 2039, <https://doi.org/10.5194/hess-23-2015-2019>, 2019.
- 79 Quinton, W. L., Adams, J. R., Baltzer, J. L., Berg, A. A., Craig, J. R., and Johnson, E.: Permafrost Ecosystems in  
80 Transition: Understanding and Predicting Hydrological and Ecological Change in the Southern Taiga Plains,  
81 Northeastern British Columbia and Southwestern Northwest Territories, 6, 2015.
- 82 Ramanujam, V. M. and Mehra, R.: L S Band SAR Data Processing and Products, in: 2019 URSI Asia-Pacific  
83 Radio Science Conference (AP-RASC), 2019 URSI Asia-Pacific Radio Science Conference (AP-RASC), 1–  
84 1, <https://doi.org/10.23919/URSIAP-RASC.2019.8738235>, 2019.
- 85 Ramanujam, V. M., Suneela, T. J. V. D., and Bhan, R.: ISRO’s dual frequency airborne SAR pre-cursor to  
86 NISAR, in: Earth Observing Missions and Sensors: Development, Implementation, and Characterization IV,  
87 Earth Observing Missions and Sensors: Development, Implementation, and Characterization IV, 98810A,  
88 <https://doi.org/10.1117/12.2228086>, 2016.
- 89 Rocha, A. V. and Shaver, G. R.: Burn severity influences postfire CO<sub>2</sub> exchange in arctic tundra, *Ecol. Appl.*, 21,  
90 477–489, <https://doi.org/10.1890/10-0255.1>, 2011a.
- 91 Rocha, A. V. and Shaver, G. R.: Postfire energy exchange in arctic tundra: the importance and climatic  
92 implications of burn severity, *Glob. Change Biol.*, 17, 2831–2841, <https://doi.org/10.1111/j.1365-2486.2011.02441.x>, 2011b.
- 94 Rosen, P.A., Kim, Y., Kumar, R., Misra, T., Bhan, R. and Sagi, V.R., 2017, May. Global persistent SAR  
95 sampling with the NASA-ISRO SAR (NISAR) mission. In *Radar Conference (RadarConf), 2017 IEEE* (pp.  
96 0410-0414). IEEE.
- 97 Roy, A., Toose, P., Mavrovic, A., Pappas, C., Royer, A., Derksen, C., Berg, A., Rowlandson, T., El-Amine, M.,  
98 Barr, A., Black, A., Langlois, A., and Sonnentag, O.: L-Band response to freeze/thaw in a boreal forest stand  
99 from ground- and tower-based radiometer observations, *Remote Sens. Environ.*, 237, 111542,  
00 <https://doi.org/10.1016/j.rse.2019.111542>, 2020.
- 01 Saatchi, S. S. and Moghaddam, M.: Estimation of crown and stem water content and biomass of boreal forest  
02 using polarimetric SAR imagery, *IEEE Trans. Geosci. Remote Sens.*, 38, 697–709,  
03 <https://doi.org/10.1109/36.841999>, 2000.
- 04 Saatchi, S., Xu, L., Yang, Y., and Yu, Y.: Evaluation of NISAR Biomass Algorithm in Temperate and Boreal  
05 Forests, IGARSS 2019 - 2019 IEEE International Geoscience and Remote Sensing Symposium, 7363–7366,  
06 <https://doi.org/10.1109/IGARSS.2019.8898657>, 2019.
- 07 Sadeghi, M., Tabatabaenejad, A., Tuller, M., Moghaddam, M., and Jones, S. B.: Advancing NASA’s AirMOSS  
08 P-Band Radar Root Zone Soil Moisture Retrieval Algorithm via Incorporation of Richards’ Equation,  
09 *Remote Sens.*, 9, 17, <https://doi.org/10.3390/rs9010017>, 2017.
- 10 Schaefer, K., Chen, A. C., Chen, J., Chen, R. H., Dogaheh, K., Jafarov, E., Liu, L., Michaelides, R. J.,  
11 Moghaddam, M., Parsekian, A. D., Sullivan, T. D., Tabatabaenejad, A., Thompson, J., and Zebker, H.: The  
12 Permafrost Dynamics Observatory, 2018a.
- 13 Schaefer, K., Chen, A. C., Chen, J., Chen, R. H., Dogaheh, K., Jafarov, E., Liu, L., Michaelides, R. J.,  
14 Moghaddam, M., Parsekian, A. D., Sullivan, T. D., Tabatabaenejad, A., Thompson, J., and Zebker, H.: The  
15 Permafrost Dynamics Observatory (PDO), 2018b.
- 16 Schaefer, K., Michaelides, R. J., Chen, R. H., Sullivan, T. D., Parsekian, A. D., Bakian-Dogaheh, K.,  
17 Tabatabaenejad, A., Moghaddam, M., Chen, J., Chen, A. C., Liu, L., and Zebker, H. A.: ABoVE: Active

18 Layer Thickness Derived from Airborne L- and P-band SAR, Alaska, 2017, ORNL DAAC,  
 19 <https://doi.org/10.3334/ORNLDAAC/1676>, 2019.

20 Schaefer, K., R.J. Michaelides, R.H. Chen, T.D. Sullivan, A.D. Parsekian, Y. Zhao, K. Bakian-Dogaheh, A.  
 21 Tabatabaenejad, M. Moghaddam, J. Chen, A.C. Chen, L. Liu, and H.A. Zebker. 2021. ABoVE: Active  
 22 Layer Thickness Derived from Airborne L- and P-band SAR, Alaska, 2017. ORNL DAAC, Oak Ridge,  
 23 Tennessee, USA. <https://doi.org/10.3334/ORNLDAAC/1796>

24 Schuur, E. A. G., Vogel, J. G., Crummer, K. G., Lee, H., Sickman, J. O., and Osterkamp, T. E.: The effect of  
 25 permafrost thaw on old carbon release and net carbon exchange from tundra, *Nature*, 459, 556–559,  
 26 <https://doi.org/10.1038/nature08031>, 2009.

27 Schuur, T.: AmeriFlux US-EML Eight Mile Lake Permafrost thaw gradient, Healy Alaska (3.5),  
 28 <https://doi.org/10.17190/AMF/1418678>, 2019.

29 Sellers, P., Hall, F., Margolis, H., Kelly, B., Baldocchi, D., Hartog, G. den, Cihlar, J., Ryan, M. G., Goodison, B.,  
 30 Crill, P., Ranson, K. J., Lettenmaier, D., and Wickland, D. E.: The Boreal Ecosystem–Atmosphere Study  
 31 (BOREAS): An Overview and Early Results from the 1994 Field Year, *Bull. Am. Meteorol. Soc.*, 76, 1549–  
 32 1577, [https://doi.org/10.1175/1520-0477\(1995\)076<1549:TBESAO>2.0.CO;2](https://doi.org/10.1175/1520-0477(1995)076<1549:TBESAO>2.0.CO;2), 1995.

33 Sellers, P. J., Hall, F. G., Kelly, R. D., Black, A., Baldocchi, D., Berry, J., Ryan, M., Ranson, K. J., Crill, P. M.,  
 34 Lettenmaier, D. P., Margolis, H., Cihlar, J., Newcomer, J., Fitzjarrald, D., Jarvis, P. G., Gower, S. T.,  
 35 Halliwell, D., Williams, D., Goodison, B., Wickland, D. E., and Guertin, F. E.: BOREAS in 1997:  
 36 Experiment overview, scientific results, and future directions, *J. Geophys. Res. Atmospheres*, 102, 28731–  
 37 28769, <https://doi.org/10.1029/97JD03300>, 1997.

38 Serrouya, R., Dickie, M., Lamb, C., van Oort, H., Kelly, A. P., DeMars, C., McLoughlin, P. D., Larter, N. C.,  
 39 Hervieux, D., Ford, A. T., and Boutin, S.: Trophic consequences of terrestrial eutrophication for a threatened  
 40 ungulate, *Proc. R. Soc. B Biol. Sci.*, 288, 20202811, <https://doi.org/10.1098/rspb.2020.2811>, 2021.

41 Sherriff, R. L., Miller, A. E., Muth, K., Schriver, M., and Batzel, R.: Spruce growth responses to warming vary  
 42 by ecoregion and ecosystem type near the forest-tundra boundary in south-west Alaska, *J. Biogeogr.*, 44,  
 43 1457–1468, <https://doi.org/10.1111/jbi.12968>, 2017.

44 Shugar, D. H., Clague, J. J., Best, J. L., Schoof, C., Willis, M. J., Copland, L., and Roe, G. H.: River piracy and  
 45 drainage basin reorganization led by climate-driven glacier retreat, *Nat. Geosci.*, 10, 370–375,  
 46 <https://doi.org/10.1038/ngeo2932>, 2017.

47 Silva, C. A., Duncanson, L., Hancock, S., Neuenschwander, A., Thomas, N., Hofton, M., Fatoyinbo, L., Simard,  
 48 M., Marshak, C. Z., Armston, J., Lutchke, S., and Dubayah, R.: Fusing simulated GEDI, ICESat-2 and  
 49 NISAR data for regional aboveground biomass mapping, *Remote Sens. Environ.*, 253, 112234,  
 50 <https://doi.org/10.1016/j.rse.2020.112234>, 2021.

51 Smith, L. C., Pavelsky, T., Lettenmaier, D. P., Gleason, C. J., Pietroniro, A., Applejohn, A., Arvesen, J. C.,  
 52 Bjella, K., Carter, T., Chao, R., Cooley, S. W., Cooper, M. G., Cretaux, J. F., Douglass, T., Faria, D., Fayne,  
 53 J., Fiset, J. M., Goodman, S., Hanna, B., Harlan, M., Langhorst, T., Marsh, P., Moreira, D. M., Minear, J. T.,  
 54 Onclin, C., Overstreet, B. T., Peters, D., Pettit, J., Pitcher, L. H., Russell, M., Spence, C., Topp, S., Turner, K.  
 55 W., Vimal, S., Wilcox, E., Woodward, J., Yang, D., and Zaino, A.: AirSWOT flights and field campaigns for  
 56 the 2017 Arctic-Boreal Vulnerability Experiment (ABoVE), in: AGU Fall Meeting Abstracts, C21F-1176,  
 57 2017a.

58 Smith, S. L., Roy, L.-P., Lewkowitz, A. G., and Chartrand, J.: Ground thermal data collection along the Alaska  
 59 Highway corridor (KP1559-1895), Yukon, summer 2016, Geological Survey of Canada, 2017b.

60 Spence, C. and Hedstrom, N.: Hydrometeorological data from Baker Creek Research Watershed, Northwest  
 61 Territories, Canada, *Earth Syst. Sci. Data*, 10, 1753–1767, <https://doi.org/10.5194/essd-10-1753-2018>, 2018.

62 Sun, G., K. J. Ranson, D. S. Kimes, J. B. Blair, and K. Kovacs (2008), Forest vertical structure from GLAS: An  
 63 evaluation using LVIS and SRTM data, *Remote Sens. Environ.*, **112**, 107–117, doi:[10.1016/j.rse.2006.09.036](https://doi.org/10.1016/j.rse.2006.09.036).

- 64 Tabatabaenejad, A., and M. Moghaddam, 2011. Retrieval of surface and deep soil moisture and effect  
65 of moisture profile on inversion accuracy. *IEEE Geosci. Remote Sensing Lett.*, vol. 8, no. 3, pp.  
66 477- 481, May 2011.
- 67 Tabatabaenejad, A., Burgin, M., Duan, X., and Moghaddam, M.: P-Band Radar Retrieval of Subsurface Soil  
68 Moisture Profile as a Second-Order Polynomial: First AirMOSS Results, *IEEE Trans. Geosci. Remote Sens.*,  
69 53, 645–658, <https://doi.org/10.1109/TGRS.2014.2326839>, 2015.
- 70 Tabatabaenejad, A., Chen, R. H., Burgin, M. S., Duan, X., Cuenca, R. H., Cosh, M. H., Scott, R. L., and  
71 Moghaddam, M.: Assessment and Validation of AirMOSS P-Band Root-Zone Soil Moisture Products, *IEEE*  
72 *Trans. Geosci. Remote Sens.*, 58, 6181–6196, <https://doi.org/10.1109/TGRS.2020.2974976>, 2020.
- 73 Tank, S., Olefeldt, D., Department of Renewable Resources, University of Alberta, Edmonton, Alberta, Canada,  
74 Quinton, W., Centre for Cold Regions and Water Science, Wilfred Laurier University, Waterloo, Ontario,  
75 Canada, Spence, C., Environment and Climate Change Canada, Saskatoon, Saskatchewan, Canada, Dion, N.,  
76 Water Resources Department, Government of Northwest Territories, Yellowknife, Northwest Territories,  
77 Canada, Ackley, C., Centre for Cold Regions and Water Science, Wilfred Laurier University, Waterloo,  
78 Ontario, Canada, Burd, K., Department of Renewable Resources, University of Alberta, Edmonton, Alberta,  
79 Canada, Hutchins, R., Department of Biological Sciences, University of Alberta, Edmonton, Alberta, Canada,  
80 Mengistu, S., and Department of Biological Sciences, University of Alberta, Edmonton, Alberta, Canada:  
81 Fire in the Arctic: The effect of wildfire across diverse aquatic ecosystems of the Northwest Territories, *Polar*  
82 *Knowl. Aqhalat Rep.*, 1, 31–38, <https://doi.org/10.35298/pkc.2018.04>, 2019.
- 83 Touzi, R., Deschamps, A., and Rother, G.: Phase of Target Scattering for Wetland Characterization Using  
84 Polarimetric C-Band SAR, *IEEE Trans. Geosci. Remote Sens.*, 47, 3241–3261,  
85 <https://doi.org/10.1109/TGRS.2009.2018626>, 2009.
- 86 Touzi, R., Omari, K., Sleep, B., and Jiao, X.: Scattered and Received Wave Polarization Optimization for  
87 Enhanced Peatland Classification and Fire Damage Assessment Using Polarimetric PALSAR, *IEEE J. Sel.*  
88 *Top. Appl. Earth Obs. Remote Sens.*, PP, 1–26, <https://doi.org/10.1109/JSTARS.2018.2873740>, 2018.
- 89 Touzi, R., Hong, G., Motohka, T., Shinichi, S., and De Lisle, D.: Investigation of Compact SAR L and C band  
90 Complementarity for Permafrost Characterization In Arctic Regions, *IGARSS 2019 - 2019 IEEE*  
91 *International Geoscience and Remote Sensing Symposium*, 4665–4667,  
92 <https://doi.org/10.1109/IGARSS.2019.8898510>, 2019a.
- 93 Touzi, R., Pawley, S., Hosseini, M., and Jiao, X.: Polarimetric L-band PALSAR2 for Discontinuous Permafrost  
94 Mapping In Peatland Regions, in: *IGARSS 2019 - 2019 IEEE International Geoscience and Remote Sensing*  
95 *Symposium, IGARSS 2019 - 2019 IEEE International Geoscience and Remote Sensing Symposium*,  
96 Yokohama, Japan, xvii–ccxxii, <https://doi.org/10.1109/IGARSS.2019.8900243>, 2019b.
- 97 Tsuyuzaki, S., Iwahana, G., and Saito, K.: Tundra fire alters vegetation patterns more than the resultant  
98 thermokarst, *Polar Biol.*, 41, 753–761, <https://doi.org/10.1007/s00300-017-2236-7>, 2018.
- 99 Ullmann, T., Banks, S. N., Schmitt, A., and Jagdhuber, T.: Scattering Characteristics of X-, C- and L-Band  
00 PolSAR Data Examined for the Tundra Environment of the Tuktoyaktuk Peninsula, Canada, *Appl. Sci.*, 7,  
01 595, <https://doi.org/10.3390/app7060595>, 2017.
- 02 Vincent, W. F., Callaghan, T. V., Dahl-Jensen, D., Johansson, M., Kovacs, K. M., Michel, C., Prowse, T., Reist,  
03 J. D., and Sharp, M.: Ecological Implications of Changes in the Arctic Cryosphere, *AMBIO*, 40, 87–99,  
04 <https://doi.org/10.1007/s13280-011-0218-5>, 2011.
- 05 Walker, B., Wilcox, E. J., and Marsh, P.: Accuracy assessment of late winter snow depth mapping for tundra  
06 environments using Structure-from-Motion photogrammetry1, *Arct. Sci.*, [https://doi.org/10.1139/as-2020-](https://doi.org/10.1139/as-2020-0006)  
07 0006, 2020.

- 08 Walker, X. J., Rogers, B. M., Baltzer, J. L., Cummings, S. R., Day, N. J., Goetz, S. J., Johnstone, J. F., Turetsky,  
09 M. R., and Mack, M. C.: ABoVE: Wildfire Carbon Emissions and Burned Plot Characteristics, NWT, CA,  
10 2014-2016, ORNL DAAC, <https://doi.org/10.3334/ORNLDAAC/1561>, 2018a.
- 11 Walker, X. J., Rogers, B. M., Baltzer, J. L., Cumming, S. G., Day, N. J., Goetz, S. J., Johnstone, J. F., Schuur, E.  
12 A. G., Turetsky, M. R., and Mack, M. C.: Cross-scale controls on carbon emissions from boreal forest  
13 megafires, *Glob. Change Biol.*, 24, 4251–4265, <https://doi.org/10.1111/gcb.14287>, 2018b.
- 14 Walker, X. J., Baltzer, J. L., Laurier, W., Cumming, S. G., Day, N. J., Goetz, S. J., Johnstone, J. F., Potter, S.,  
15 Rogers, B. M., Schuur, E. a. G., Turetsky, M. R., and Mack, M. C.: ABoVE: Characterization of Carbon  
16 Dynamics in Burned Forest Plots, NWT, Canada, 2014, ORNL DAAC,  
17 <https://doi.org/10.3334/ORNLDAAC/1664>, 2019a.
- 18 Walker, X. J., Baltzer, J. L., Cumming, S. G., Day, N. J., Ebert, C., Goetz, S., Johnstone, J. F., Potter, S., Rogers,  
19 B. M., Schuur, E. A. G., Turetsky, M. R., and Mack, M. C.: Increasing wildfires threaten historic carbon sink  
20 of boreal forest soils, *Nature*, 572, 520–523, <https://doi.org/10.1038/s41586-019-1474-y>, 2019b.
- 21 Whalen, D., Forbes, D. L., Hopkinson, C., Lavergne, J. C., Manson, G. K., Marsh, P., and Solomon, S. M.:  
22 Topographic LiDAR-Providing a new perspective in the Mackenzie Delta, 2009.
- 23 Whitley, M., Frost, G. V., Jorgenson, M. T., Macander, M., Maio, C. V., and Winder, S. G.: ABoVE: Permafrost  
24 Measurements and Distribution Across the Y-K Delta, Alaska, 2016, ORNL DAAC,  
25 <https://doi.org/10.3334/ORNLDAAC/1598>, 2018a.
- 26 Whitley, M. A., Frost, G. V., Jorgenson, M. T., Macander, M. J., Maio, C. V., and Winder, S. G.: Assessment of  
27 LiDAR and Spectral Techniques for High-Resolution Mapping of Sporadic Permafrost on the Yukon-  
28 Kuskokwim Delta, Alaska, *Remote Sens.*, 10, 258, <https://doi.org/10.3390/rs10020258>, 2018b.
- 29 Wilcox, E. J., Keim, D., Jong, T. de, Walker, B., Sonntag, O., Sniderhan, A. E., Mann, P., and Marsh, P.:  
30 Tundra shrub expansion may amplify permafrost thaw by advancing snowmelt timing, *Arct. Sci.*,  
31 <https://doi.org/10.1139/as-2018-0028>, 2019.
- 32 Wilson, C., Dann, J., Bolton, R., Charsley-Groffman, L., Jafarov, E., Musa, D., and Wulschleger, S.: In Situ Soil  
33 Moisture and Thaw Depth Measurements Coincident with Airborne SAR Data Collections, Barrow and  
34 Seward Peninsulas, Alaska, 2017, <https://doi.org/10.5440/1423892>, 2021.
- 35 Woodward, A. and Beever, E. A.: Conceptual ecological models to support detection of ecological change on  
36 Alaska National Wildlife Refuges, 2011.
- 37 Yi, Y., Kimball, J. S., Chen, R. H., Moghaddam, M., Reichle, R. H., Mishra, U., Zona, D., and Oechel, W. C.:  
38 Characterizing permafrost active layer dynamics and sensitivity to landscape spatial heterogeneity in Alaska,  
39 *The Cryosphere*, 12, 145–161, <https://doi.org/10.5194/tc-12-145-2018>, 2018.
- 40 Zhang, Y., Touzi, R., Feng, W., Hong, G., Lantz, T. C., and Kokelj, S. V.: Landscape-scale variations in near-  
41 surface soil temperature and active-layer thickness: Implications for high-resolution permafrost mapping,  
42 *Permafr. Periglac. Process. J.*, 2021.
- 43  
44  
45  
46
